# Supplementary material for: Transcriptome and Secretome Analyses of Endophyte Methylobacterium mesophilicum and Pathogen Xylella fastidiosa Interacting Show Nutrient Competition
Source: MDPI journal article supplement (doi:10.3390/microorganisms11112755), 2023-11-11
Supplement: s1 [file s1]

## Supplementary material

**Table S1.** Quantification of cDNA libraries using Nanodrop (absorbance values). Treatments: *Xf*: *X. fastidiosa* 9a5c; *Xf+Mm*: *X. fastidiosa* 9a5c + *M. mesophilicum* SR1.6/6; *Mm*: *M. mesophilicum* SR1.6/6.

|              |       | Replicate 1    |                | Replicate 2 |                | Replicate 3    |       |                |                |
|--------------|-------|----------------|----------------|-------------|----------------|----------------|-------|----------------|----------------|
| Treatment    | ng/μl | A260/A280 (nm) | A260/A230 (nm) | ng/μl       | A260/A280 (nm) | A260/A230 (nm) | ng/μl | A260/A280 (nm) | A260/A230 (nm) |
| <i>Xf</i>    | 64.7  | 1.89           | 2.23           | 79.1        | 1.88           | 2.29           | 71.4  | 1.86           | 2.19           |
| <i>Xf+Mm</i> | 35.1  | 1.89           | 2.20           | 46.5        | 1.87           | 2.20           | 50.9  | 1.87           | 2.11           |
| <i>Mm</i>    | 22.6  | 1.90           | 1.98           | 42.7        | 1.85           | 1.96           | 29.6  | 1.89           | 2.13           |

**Table S2.** Amount of reads per run and per treatment. Treatments: *Xf*: *X. fastidiosa* 9a5c; *Xf+Mm*: *X. fastidiosa* 9a5c + *M. mesophilicum* SR1.6/6; *Mm*: *M. mesophilicum* SR1.6/6.

| Treatment (replicate) | Index  | Runs | Reads percentage | Number of reads per treatment | Total reads of the run (PF-pass filter) | Total reads >Q30* (%) |
|-----------------------|--------|------|------------------|-------------------------------|-----------------------------------------|-----------------------|
| <i>Xf</i> (1)         | AGTTCC | 1    | 14.96            | 3,469,612                     | 24,782,942                              | 64.85                 |
| <i>Xf+Mm</i> (1)      | CCGTCC |      | 14.97            | 3,708,938                     |                                         |                       |
| <i>Mm</i> (1)         | GTCCGC |      | 13.57            | 3,345,697                     |                                         |                       |
| <i>Xf</i> (2)         | CTTGTA | 2    | 17.38            | 5,387,824                     | 31,143,494                              | 78.69                 |
| <i>Xf+Mm</i> (2)      | ATGTCA |      | 16.00            | 4,982,959                     |                                         |                       |
| <i>Mm</i> (2)         | GTGAAA |      | 14.67            | 4,546,950                     |                                         |                       |
| <i>Xf</i> (3)         | AGTCAA | 3    | 15.12            | 4,080,772                     | 26,989,232                              | 80.97                 |
| <i>Xf+Mm</i> (3)      | ATGTCA |      | 16.80            | 4,534,191                     |                                         |                       |
| <i>Mm</i> (3)         | GTCCGC |      | 14.86            | 4,010,600                     |                                         |                       |

\*Q30 score means an error probability of 1-1000 of a nucleotide assignment.

**Table S3.** Number of mapped reads in *Xf* and *Mm* using CLC Genomics Workbench software. *Xf*: *X. fastidiosa*; *Mm*: *M. mesophilicum*.

| Treatment                        | Biological replicate | Number of reads | Mapped reads in pairs | % mapped reads | Unique fragments |
|----------------------------------|----------------------|-----------------|-----------------------|----------------|------------------|
| <i>X. fastidiosa</i> monoculture |                      |                 |                       |                |                  |

|                                              |   |           |           |       |           |
|----------------------------------------------|---|-----------|-----------|-------|-----------|
| <i>Xf</i>                                    | 1 | 3,706,786 | 2,898,062 | 78.18 | 1,449,031 |
| <i>Xf</i> pXF51                              |   |           | 59,234    | 1.60  | 29,617    |
| <i>Xf</i>                                    | 2 | 5,413,426 | 4,259,328 | 78.68 | 2,129,664 |
| <i>Xf</i> pXF51                              |   |           | 94,616    | 1.75  | 47,308    |
| <i>Xf</i>                                    | 3 | 4,082,770 | 3,414,068 | 83.62 | 1,700,027 |
| <i>Xf</i> pXF51                              |   |           | 110,856   | 2.44  | 55,330    |
| Average                                      |   | 4,400,994 | 3,523,819 | 80.16 | 1,759,574 |
| <b>Co-culture mapped in <i>Xf</i> genome</b> |   |           |           |       |           |
| <u><i>Xf+Mm</i></u> in <i>Xf</i>             | 1 | 3,708,938 | 1,514,052 | 40.82 | 757,026   |
| <u><i>Xf+Mm</i></u> in <i>Xf</i> pXF51       |   |           | 56,182    | 1.51  | 28,091    |
| <u><i>Xf+Mm</i></u> in <i>Xf</i>             | 2 | 4,987,168 | 2,695,846 | 54.06 | 1,347,923 |
| <u><i>Xf+Mm</i></u> in <i>Xf</i> pXF51       |   |           | 103,718   | 2.08  | 51,859    |
| <u><i>Xf+Mm</i></u> in <i>Xf</i>             | 3 | 4,536,488 | 2,644,388 | 58.29 | 1 317,944 |
| <u><i>Xf+Mm</i></u> in <i>Xf</i> pXF51       |   |           | 89,750    | 2.20  | 29,417    |
| Average                                      |   | 4,410,865 | 2,284,762 | 51.05 | 1,140,964 |
| <b>Co-culture mapped in <i>Mm</i> genome</b> |   |           |           |       |           |
| <u><i>Xf+Mm</i></u> in <i>Mm</i>             | 1 | 3,708,938 | 1,053,066 | 28.39 | 526,533   |
| <u><i>Xf+Mm</i></u> in <i>Mm</i>             | 2 | 4,987,168 | 1,287,294 | 25.81 | 643,647   |
| <u><i>Xf+Mm</i></u> in <i>Mm</i>             | 3 | 4,536,488 | 1,135,146 | 25.02 | 564,667   |
| Average                                      |   | 4,410,865 | 1,158,502 | 26.41 | 578,282   |
| <b><i>M. mesophilicum</i> monoculture</b>    |   |           |           |       |           |
| <i>Mm</i>                                    | 1 | 3,362,754 | 1,853,878 | 55.13 | 926,939   |
| <i>Mm</i>                                    | 2 | 4,568,912 | 3,575,600 | 78.26 | 1,787,800 |
| <i>Mm</i>                                    | 3 | 4,011,524 | 3,248,148 | 80.97 | 1,617,962 |
| Average                                      |   | 3,981,063 | 2,892,542 | 71.45 | 1,444,234 |

**Table S4.** Differentially expressed genes in the endophyte *Xf* only and during co-culture.

| Class                    | Genic Category |                   | SeqName    | Gene product name                              | log2FoldChange | Description                                           | Length | #Hits | #GO | GO Names list                                                                                                                                   | Enzyme Codes list | InterPro IDs                                                                                                                                                                                                                                                                                                                         |
|--------------------------|----------------|-------------------|------------|------------------------------------------------|----------------|-------------------------------------------------------|--------|-------|-----|-------------------------------------------------------------------------------------------------------------------------------------------------|-------------------|--------------------------------------------------------------------------------------------------------------------------------------------------------------------------------------------------------------------------------------------------------------------------------------------------------------------------------------|
| Macromolecule metabolism | RNA metabolism | ribosomal protein | XF9a_01063 | ribosomal protein L2, bacterial/organellar     | -0.429978502   | RL2_XYLFA ame: Full=50S ribosomal L2                  | 275    | 5     | 5   | F:structural constituent of ribosome; C:large ribosomal subunit; F:transferase activity; F:rRNA binding; P:translation                          |                   | IPR022669 (SMART); IPR002171 (SMART); IPR022669 (PFAM); IPR005880 (TIGRFAM); IPR014726 (G3DSA:4.10.950.GENE3D); IPR022666 (PFAM); IPR002171 (PIRSF); G3DSA:2.40.50.140 (GENE3D); IPR014722 (G3DSA:2.30.30.GENE3D); PTHR13691:SF5 (PANTHER); IPR002171 (PANTHER); IPR005880 (HAMAP); IPR012340 (SUPERFAMILY); IPR008991 (SUPERFAMILY) |
|                          | RNA metabolism | ribosomal protein | XF9a_02489 | Ribosomal protein L10                          | -0.572760956   | RL10_XYLFA ame: Full=50S ribosomal L10                | 175    | 5     | 5   | F:structural constituent of ribosome; P:ribosome biogenesis; C:ribosome; F:large ribosomal subunit rRNA binding; P:translation                  |                   | G3DSA:3.30.70.1730 (GENE3D); IPR001790 (PFAM); PTHR11560 (PANTHER); PTHR11560:SF8 (PANTHER); IPR022973 (HAMAP); SSF160369 (SUPERFAMILY)                                                                                                                                                                                              |
|                          | RNA metabolism | ribosomal protein | XF9a_02485 | ribosomal protein S12, bacterial/organelle     | -0.650397594   | RS12_XYLFT ame: Full=30S ribosomal S12                | 132    | 5     | 5   | F:structural constituent of ribosome; C:small ribosomal subunit; F:tRNA binding; F:rRNA binding; P:translation                                  |                   | IPR006032 (PRINTS); IPR006032 (PIRSF); IPR005679 (TIGRFAM); IPR006032 (PFAM); G3DSA:2.40.50.140 (GENE3D); PTHR11652:SF1 (PANTHER); IPR006032 (PANTHER); IPR005679 (HAMAP); IPR012340 (SUPERFAMILY)                                                                                                                                   |
|                          | RNA metabolism | ribosomal protein | XF9a_02441 | ribosomal protein S2, bacterial type           | -0.55705189    | RS2_XYLFT ame: Full=30S ribosomal S2                  | 266    | 5     | 3   | F:structural constituent of ribosome; C:small ribosomal subunit; P:translation                                                                  |                   | IPR001865 (PRINTS); G3DSA:3.40.50.10490 (GENE3D); IPR005706 (TIGRFAM); G3DSA:1.10.287.610 (GENE3D); IPR001865 (PFAM); IPR005706 (PANTHER); PTHR12534:SFO (PANTHER); IPR005706 (HAMAP); IPR023591 (SUPERFAMILY)                                                                                                                       |
|                          | RNA metabolism | ribosomal protein | XF9a_01083 | ribosomal protein S4, bacterial/organelle type | -0.588341505   | RS4_XYLFA ame: Full=30S ribosomal S4                  | 208    | 5     | 5   | P:positive regulation of translational fidelity; F:structural constituent of ribosome; C:small ribosomal subunit; F:rRNA binding; P:translation |                   | IPR002942 (SMART); IPR001912 (SMART); G3DSA:1.10.1050.10 (GENE3D); IPR002942 (PFAM); IPR036986 (G3DSA:3.10.290.GENE3D); IPR005709 (TIGRFAM); IPR001912 (PFAM); IPR022801 (PANTHER); IPR005709 (PTHR11831:PANTHER); IPR005709 (HAMAP); IPR002942 (PROSITE_PROFILES); SSF55174 (SUPERFAMILY)                                           |
|                          | RNA metabolism | Elongation factor | XF9a_02440 | translation elongation factor Ts               | -0.518813753   | EFTS_XYLFA ame: Full=Elongation factor Ts Short=EF-Ts | 292    | 5     | 3   | F:translation elongation factor activity; C:cytoplasm; P:translational elongation                                                               |                   | IPR036402 (G3DSA:3.30.479.GENE3D); G3DSA:1.10.286.20 (GENE3D); IPR014039 (PFAM); G3DSA:1.10.8.10 (GENE3D);                                                                                                                                                                                                                           |

|  |                   |                   |            |                                           |              |                                                           |     |   |   |                                                                                                                                 |                                                                                                                                                                                                                                                                                                                                                                                                                                                                                                                                                                                                                                               |
|--|-------------------|-------------------|------------|-------------------------------------------|--------------|-----------------------------------------------------------|-----|---|---|---------------------------------------------------------------------------------------------------------------------------------|-----------------------------------------------------------------------------------------------------------------------------------------------------------------------------------------------------------------------------------------------------------------------------------------------------------------------------------------------------------------------------------------------------------------------------------------------------------------------------------------------------------------------------------------------------------------------------------------------------------------------------------------------|
|  |                   |                   |            |                                           |              |                                                           |     |   |   |                                                                                                                                 | IPR001816 (TIGRFAM);<br>IPR036402<br>(G3DSA:3.30.479.GENE3D);<br>IPR001816 (PANTHER);<br>IPR001816 (HAMAP);<br>IPR009060 (SUPERFAMILY);<br>IPR036402 (SUPERFAMILY);<br>IPR036402 (SUPERFAMILY)                                                                                                                                                                                                                                                                                                                                                                                                                                                |
|  | RNA<br>metabolism | Elongation factor | XF9a_02483 | translation elongation<br>factor EF-G     | -0.398759307 | EFG_XYLFA ame:<br>Full=Elongation factor<br>G Short=EF-G  | 705 | 5 | 5 | F:GTP binding; F:translation<br>elongation factor activity;<br>C:cytoplasm; F:GTPase<br>activity; P:translational<br>elongation | IPR000795 (PRINTS);<br>IPR000640 (SMART);<br>IPR005517 (SMART);<br>IPR005517 (PFAM);<br>G3DSA:2.40.30.10 (GENE3D);<br>G3DSA:3.30.70.240 (GENE3D);<br>IPR005225 (TIGRFAM);<br>IPR004161 (PFAM); IPR014721<br>(G3DSA:3.30.230.GENE3D);<br>G3DSA:3.40.50.300 (GENE3D);<br>PF14492 (PFAM); IPR000795<br>(PFAM); IPR000640 (PFAM);<br>IPR004540 (TIGRFAM);<br>G3DSA:3.30.70.870 (GENE3D);<br>PTHR43261:SF1 (PANTHER);<br>PTHR43261 (PANTHER);<br>IPR000795<br>(PROSITE_PROFILES);<br>IPR004540 (HAMAP);<br>IPR027417 (SUPERFAMILY);<br>IPR035647 (SUPERFAMILY);<br>IPR035647 (SUPERFAMILY);<br>IPR009000 (SUPERFAMILY);<br>IPR020568 (SUPERFAMILY) |
|  | RNA<br>metabolism | Elongation factor | XF9a_02333 | translation elongation<br>factor P        | -0.577403731 | EF_P_XYLFT ame:<br>Full=Elongation factor P<br>Short=EF-P | 188 | 5 | 3 | F:translation elongation<br>factor activity; C:cytoplasm;<br>P:translational elongation                                         | IPR015365 (SMART);<br>IPR001059 (SMART);<br>IPR020599 (PIRSF); IPR013185<br>(PFAM); IPR011768 (TIGRFAM);<br>IPR001059 (PFAM);<br>G3DSA:2.40.50.140 (GENE3D);<br>IPR014722<br>(G3DSA:2.30.30.GENE3D);<br>IPR015365 (PFAM);<br>G3DSA:2.40.50.140 (GENE3D);<br>IPR020599 (PANTHER);<br>IPR011768 (HAMAP);<br>IPR008991 (SUPERFAMILY);<br>IPR012340 (SUPERFAMILY);<br>IPR012340 (SUPERFAMILY)                                                                                                                                                                                                                                                     |
|  | RNA<br>metabolism | Elongation factor | XF9a_02099 | elongation factor P-<br>like protein YeiP | 0.854980632  | EFPL_XYLFA ame:<br>Full=Elongation factor P               | 188 | 5 | 3 | F:translation elongation<br>factor activity; C:cytoplasm;<br>P:translational elongation                                         | IPR015365 (SMART);<br>IPR001059 (SMART);<br>G3DSA:2.40.50.140 (GENE3D);<br>IPR015365 (PFAM); IPR013185<br>(PFAM); IPR014722<br>(G3DSA:2.30.30.GENE3D);<br>IPR020599 (PIRSF); IPR011897<br>(TIGRFAM); IPR001059 (PFAM);<br>G3DSA:2.40.50.140 (GENE3D);<br>PTHR30053:SF5 (PANTHER);<br>IPR020599 (PANTHER);<br>IPR011897 (HAMAP);<br>IPR008991 (SUPERFAMILY);<br>IPR012340 (SUPERFAMILY);<br>IPR012340 (SUPERFAMILY)                                                                                                                                                                                                                            |

|  |                |                                 |            |                                                                                            |              |                                                                                                                                                                                                                                                                                         |     |   |    |                                                                                                                                                                                                                                                                                                                                                                                                |              |                                                                                                                                                                                                                                                                                                                                                               |
|--|----------------|---------------------------------|------------|--------------------------------------------------------------------------------------------|--------------|-----------------------------------------------------------------------------------------------------------------------------------------------------------------------------------------------------------------------------------------------------------------------------------------|-----|---|----|------------------------------------------------------------------------------------------------------------------------------------------------------------------------------------------------------------------------------------------------------------------------------------------------------------------------------------------------------------------------------------------------|--------------|---------------------------------------------------------------------------------------------------------------------------------------------------------------------------------------------------------------------------------------------------------------------------------------------------------------------------------------------------------------|
|  | RNA metabolism |                                 | XF9a_02511 | Predicted N6-adenine-specific DNA methylase ( EC:2.1.1.173 )                               | 0.526446529  | RLMKL_XYLFA ame: Full=Ribosomal RNA large subunit methyltransferase K L Includes: ame: Full=23S rRNA m2G2445 methyltransferase ame: Full=rRNA (guanine-N(2)-)-methyltransferase Includes: ame: Full=23S rRNA m7G2069 methyltransferase ame: Full=rRNA (guanine-N(7)-)-methyltransferase | 748 | 5 | 5  | F:RNA binding; C:cytoplasm; F:rRNA (guanine-N7)-methyltransferase activity; F:23S rRNA (guanine(2445)-N(2))-methyltransferase activity; P:rRNA (guanine-N7)-methylation                                                                                                                                                                                                                        | EC:2.1.1.173 | IPR004114 (SMART); IPR017244 (PIRSF); G3DSA:3.30.750.80 (GENE3D); G3DSA:3.30.2130.30 (GENE3D); IPR004114 (PFAM); G3DSA:3.40.50.150 (GENE3D); G3DSA:3.40.50.150 (GENE3D); IPR000241 (PFAM); IPR019614 (PFAM); PTHR18895 (PANTHER); PTHR18895:SF62 (PANTHER); IPR004114 (PROSITE_PROFILES); IPR017244 (HAMAP); IPR029063 (SUPERFAMILY); IPR029063 (SUPERFAMILY) |
|  | RNA metabolism | transcription factor binding    | XF9a_02233 | Response regulator containing CheY-like receiver, AAA-type ATPase, and DNA-binding domains | 0.633263148  | Y2439_ANADF ame: Full=Response regulator receiver Anaef109_2439                                                                                                                                                                                                                         | 236 | 5 | 3  | P:regulation of cellular process; F:binding; P:cellular process                                                                                                                                                                                                                                                                                                                                |              | IPR001789 (SMART); IPR008207 (PFAM); IPR036641 (G3DSA:1.20.120.GENE3D); G3DSA:3.40.50.2300 (GENE3D); IPR001789 (PFAM); PTHR26402 (PANTHER); IPR001789 (PROSITE_PROFILES); IPR008207 (PROSITE_PROFILES); IPR011006 (SUPERFAMILY); IPR036641 (SUPERFAMILY)                                                                                                      |
|  | RNA metabolism |                                 | XF9a_02299 | integration host factor, beta subunit                                                      | -0.625635812 | IHFB_XYLFA ame: Full=integration host factor subunit beta Short=IHf-beta                                                                                                                                                                                                                | 104 | 5 | 7  | P:regulation of translation; F:DNA binding; P:transcription, DNA-templated; P:DNA recombination; C:cytosol; P:regulation of transcription, DNA-templated; C:chromosome                                                                                                                                                                                                                         |              | IPR000119 (PRINTS); IPR000119 (SMART); IPR000119 (PFAM); IPR010992 (G3DSA:4.10.520.GENE3D); IPR005685 (TIGRFAM); IPR000119 (PANTHER); PTHR33175:SF5 (PANTHER); IPR005685 (HAMAP); IPR010992 (SUPERFAMILY)                                                                                                                                                     |
|  | RNA metabolism |                                 | XF9a_01462 | Predicted nucleic acid-binding protein, contains PIN domain                                | -0.629265663 | Y4JK_RHISN ame: Full=ribonuclease Y4JK Short=RNase Y4JK ame: Full= plasmid stability Y4JK ame: Full=Toxin Y4JK                                                                                                                                                                          | 142 | 5 | 5  | P:nucleic acid phosphodiester bond hydrolysis; F:protein binding; F:metal ion binding; P:migration in host; F:nuclease activity                                                                                                                                                                                                                                                                |              | IPR002716 (PFAM); G3DSA:3.40.50.1010 (GENE3D); PTHR33653:SF1 (PANTHER); PTHR33653 (PANTHER); IPR022907 (HAMAP); IPR029060 (SUPERFAMILY)                                                                                                                                                                                                                       |
|  | RNA metabolism | post transcriptional regulation | XF9a_01626 | hypothetical protein                                                                       | -0.605930558 | TDRD7_MOUSE ame: Full=Tudor domain-containing 7 ame: Full=PCTAIRE2-binding ame: Full=Tudor repeat associator with PCTAIRE-2 Short=Trap                                                                                                                                                  | 208 | 2 | 17 | P:germ cell development; C:ribonucleoprotein granule; C:chromatoid body; P:lens morphogenesis in camera-type eye; P:posttranscriptional regulation of gene expression; F:protein binding; C:intracellular ribonucleoprotein complex; C:cytoplasm; C:mitochondrial matrix; F:protein N-terminus binding; C:P granule; P:cell differentiation; F:mRNA binding; P:lens fiber cell differentiation |              | no IPS match                                                                                                                                                                                                                                                                                                                                                  |
|  | RNA metabolism | miscRNA                         | XF9a_01899 | 6S / SsrS RNA ( miscRNA ) (XF9a_gi57014152.1: 2679305bp)                                   | 1.0111716    |                                                                                                                                                                                                                                                                                         | 186 |   |    |                                                                                                                                                                                                                                                                                                                                                                                                |              | no IPS match                                                                                                                                                                                                                                                                                                                                                  |
|  | RNA metabolism | miscRNA                         | XF9a_00950 | Bacterial signal recognition particle RNA ( miscRNA ) (XF9a_gi57014152.1: 2679305bp)       | 0.809822873  |                                                                                                                                                                                                                                                                                         | 100 |   |    |                                                                                                                                                                                                                                                                                                                                                                                                |              | no IPS match                                                                                                                                                                                                                                                                                                                                                  |

|                         |                    |                                     |            |                                                                      |              |                                                                                                                                                                             |     |   |   |                                                                                                                                                                                                                                                                                             |             |                                                                                                                                                                                                                                                                                      |
|-------------------------|--------------------|-------------------------------------|------------|----------------------------------------------------------------------|--------------|-----------------------------------------------------------------------------------------------------------------------------------------------------------------------------|-----|---|---|---------------------------------------------------------------------------------------------------------------------------------------------------------------------------------------------------------------------------------------------------------------------------------------------|-------------|--------------------------------------------------------------------------------------------------------------------------------------------------------------------------------------------------------------------------------------------------------------------------------------|
|                         | RNA metabolism     | miscRNA                             | XF9a_00973 | Bacterial RNase P class A ( miscRNA ) (XF9a_gi57014152.1: 2679305bp) | 2.329311093  |                                                                                                                                                                             | 350 |   |   |                                                                                                                                                                                                                                                                                             |             | no IPS match                                                                                                                                                                                                                                                                         |
|                         | Protein metabolism | tRNA                                | XF9a_00214 | tRNA_Met_CAT ( tRNA ) (XF9a_gi57014152.1: 2679305bp)                 | -0.755430102 |                                                                                                                                                                             | 77  |   |   |                                                                                                                                                                                                                                                                                             |             | no IPS match                                                                                                                                                                                                                                                                         |
|                         | Protein metabolism | tRNA                                | XF9a_02429 | asparaginyl-tRNA synthetase ( EC:6.1.1.22 )                          | -0.481090758 | SYN_XYLFA ame: Full=Asparagine--tRNA ligase ame: Full=Asparaginyl-tRNA synthetase Short=                                                                                    | 466 | 5 | 5 | F:nucleic acid binding; F:ATP binding; C:cytoplasm; F:asparagine-tRNA ligase activity; P:asparaginyl-tRNA aminoacylation                                                                                                                                                                    | EC:6.1.1.22 | IPR002312 (PRINTS); G3DSA:3.30.930.10 (GENE3D); G3DSA:2.40.50.140 (GENE3D); IPR004364 (PFAM); IPR004522 (TIGRFAM); IPR004365 (PFAM); PTHR22594 (PANTHER); PTHR22594:SF44 (PANTHER); IPR006195 (PROSITE_PROFILES); IPR004522 (HAMAP); SSF55681 (SUPERFAMILY); IPR012340 (SUPERFAMILY) |
|                         | Protein metabolism | tRNA                                | XF9a_00387 | tryptophanyl-tRNA synthetase ( EC:6.1.1.2 )                          | 0.677162266  | SYW_XYLFA ame: Full=Tryptophan--tRNA ligase ame: Full=Tryptophanyl-tRNA synthetase Short=                                                                                   | 430 | 5 | 4 | F:ATP binding; C:cytoplasm; P:tryptophanyl-tRNA aminoacylation; F:tryptophan-tRNA ligase activity                                                                                                                                                                                           | EC:6.1.1.2  | IPR002306 (PRINTS); G3DSA:1.10.240.10 (GENE3D); IPR014729 (G3DSA:3.40.50.GENE3D); IPR002306 (TIGRFAM); IPR002305 (PFAM); PTHR43766 (PANTHER); IPR024109 (HAMAP); IPR036913 (SUPERFAMILY); SSF52374 (SUPERFAMILY)                                                                     |
|                         | Protein metabolism | tRNA                                | XF9a_02509 | glutamyl-tRNA reductase ( EC:1.2.1.70 )                              | 0.528218218  | HEM1_XYLFA ame: Full=Glutamyl-tRNA reductase Short=                                                                                                                         | 418 | 5 | 4 | F:NADP binding; F:glutamyl-tRNA reductase activity; P:oxidation-reduction process; P:protoporphyrinogen IX biosynthetic process                                                                                                                                                             | EC:1.2.1.70 | IPR015895 (PFAM); IPR000343 (TIGRFAM); IPR006151 (PFAM); IPR000343 (PIRSF); G3DSA:3.40.50.720 (GENE3D); IPR015896 (PFAM); IPR036343 (G3DSA:3.30.460.GENE3D); PTHR43013 (PANTHER); IPR000343 (HAMAP); IPR036453 (SUPERFAMILY); IPR036343 (SUPERFAMILY); IPR036291 (SUPERFAMILY)       |
|                         |                    |                                     |            | presente no biofilme - trabalho de proteoma                          |              |                                                                                                                                                                             |     |   |   |                                                                                                                                                                                                                                                                                             |             |                                                                                                                                                                                                                                                                                      |
|                         |                    |                                     |            |                                                                      |              |                                                                                                                                                                             |     |   |   |                                                                                                                                                                                                                                                                                             |             |                                                                                                                                                                                                                                                                                      |
| Intermediary metabolism | Energy Production  | electron transport                  | XF9a_01056 | ATP synthase, F0 subunit c ( EC:3.6.3.14 )                           | -0.476177408 | ATPL_VEREI ame: Full=ATP synthase subunit c ame: Full=ATP synthase F(0) sector subunit c ame: Full=F-type ATPase subunit c Short=F-ATPase subunit c ame: Full=Lipid-binding | 101 | 5 | 6 | P:ATP hydrolysis coupled proton transport; C:plasma membrane proton-transporting ATP synthase complex, coupling factor F(o); C:integral component of membrane; F:lipid binding; P:ATP synthesis coupled proton transport; F:proton-transporting ATP synthase activity, rotational mechanism |             | IPR000454 (PRINTS); IPR005953 (TIGRFAM); IPR038662 (G3DSA:1.20.20.GENE3D); IPR002379 (PFAM); IPR000454 (PANTHER); PTHR10031:SF0 (PANTHER); IPR000454 (HAMAP); IPR035921 (SUPERFAMILY)                                                                                                |
|                         |                    | Sulfur Metabolism / ATP byssintesis | XF9a_01373 | sulfate adenyltransferase, small subunit ( EC:2.7.7.4 ) 60:60        | -0.906128907 | CYSD_XYLFA ame: Full=Sulfate adenyltransferase subunit 2 ame: Full=ATP-sulfurylase                                                                                          | 304 | 5 | 5 |                                                                                                                                                                                                                                                                                             | EC:2.7.7.4  | IPR011784 (PIRSF); IPR014729 (G3DSA:3.40.50.GENE3D); IPR002500 (PFAM); IPR011784 (TIGRFAM); PTHR43196 (PANTHER); IPR011784                                                                                                                                                           |

|  |  |                    |            |                                                                                 |              |                                                                                                                                                                                                                                                                                                                                                                              |     |   |   |                                                                                                                                                                                                                                          |                            |                                                                                                                                                                                                                                                                                                                                                                                                                                                                                           |
|--|--|--------------------|------------|---------------------------------------------------------------------------------|--------------|------------------------------------------------------------------------------------------------------------------------------------------------------------------------------------------------------------------------------------------------------------------------------------------------------------------------------------------------------------------------------|-----|---|---|------------------------------------------------------------------------------------------------------------------------------------------------------------------------------------------------------------------------------------------|----------------------------|-------------------------------------------------------------------------------------------------------------------------------------------------------------------------------------------------------------------------------------------------------------------------------------------------------------------------------------------------------------------------------------------------------------------------------------------------------------------------------------------|
|  |  |                    |            |                                                                                 |              | small subunit ame:<br>Full=Sulfate adenylate<br>transferase Short=SAT                                                                                                                                                                                                                                                                                                        |     |   |   |                                                                                                                                                                                                                                          |                            | (HAMAP); SSF52402<br>(SUPERFAMILY)                                                                                                                                                                                                                                                                                                                                                                                                                                                        |
|  |  | Sulfur Metabolism  | XF9a_01374 | sulfate<br>adenyltransferase,<br>large subunit ( EC:2.7.1.25,EC:2.7.7.4 )       | -0.444791682 | CYSNC_XYLFA ame:<br>Full=Bifunctional<br>enzyme Includes: ame:<br>Full=Sulfate<br>adenyltransferase<br>subunit 1 ame:<br>Full=ATP-sulfurylase<br>large subunit ame:<br>Full=Sulfate adenylate<br>transferase Short=SAT<br>Includes: ame:<br>Full=Adenyl-sulfate<br>kinase ame: Full=APS<br>kinase ame: Full=ATP<br>adenosine-5 -<br>phosphosulfate 3 -<br>phosphotransferase | 660 | 5 | 8 | F:GTP binding; F:ATP<br>binding; P:hydrogen sulfide<br>biosynthetic process;<br>F:GTPase activity;<br>F:adenylsulfate kinase<br>activity; F:sulfate<br>adenyltransferase (ATP)<br>activity; P:phosphorylation;<br>P:sulfate assimilation | EC:2.7.7.4;<br>EC:2.7.1.25 | IPR000795 (PRINTS);<br>G3DSA:3.40.50.300 (GENE3D);<br>IPR011779 (TIGRFAM);<br>PFO1583 (PFAM);<br>G3DSA:2.40.30.10 (GENE3D);<br>IPR002891 (TIGRFAM);<br>IPR000795 (PFAM);<br>G3DSA:2.40.30.10 (GENE3D);<br>G3DSA:3.40.50.300 (GENE3D);<br>PTHR11055:SF27 (PANTHER);<br>PTHR11055 (PANTHER);<br>IPR011779 (HAMAP);<br>IPR002891 (HAMAP);<br>IPR000795<br>(PROSITE_PROFILES);<br>IPR027417 (SUPERFAMILY);<br>IPR009001 (SUPERFAMILY);<br>IPR009000 (SUPERFAMILY);<br>IPR027417 (SUPERFAMILY) |
|  |  | Faz NADPH          | XF9a_01709 | ketol-acid<br>reductoisomerase ( EC:1.1.1.86 )                                  | -0.483212318 | ILVC_XYLFA ame:<br>Full=Ketol-acid<br>reductoisomerase<br>(NADP(+)) Short=KARI<br>ame:<br>Full=Acetohydroxy-acid<br>isomeroeductase<br>Short=AHIR ame:<br>Full=Alpha-keto-beta-<br>hydroxylacyl<br>reductoisomerase ame:<br>Full=Ketol-acid<br>reductoisomerase type<br>1 ame: Full=Ketol-acid<br>reductoisomerase type<br>I                                                 | 335 | 5 | 4 | P:isoleucine biosynthetic<br>process; P:valine<br>biosynthetic process;<br>P:oxidation-reduction<br>process; F:ketol-acid<br>reductoisomerase activity                                                                                   | EC:1.1.1.86                | IPR013116 (PFAM); IPR014359<br>(PIRSF); G3DSA:1.10.3730.40<br>(GENE3D); G3DSA:3.40.50.720<br>(GENE3D); IPR000506 (PFAM);<br>IPR013023 (TIGRFAM);<br>PTHR21371:SF1 (PANTHER);<br>IPR013023 (PANTHER);<br>IPR000506<br>(PROSITE_PROFILES);<br>IPR013116<br>(PROSITE_PROFILES);<br>IPR013023 (HAMAP);<br>IPR036291 (SUPERFAMILY);<br>IPR008927 (SUPERFAMILY)                                                                                                                                 |
|  |  | Faz NADPH          | XF9a_02062 | nicotinate<br>(nicotinamide)<br>nucleotide<br>adenyltransferase ( EC:2.7.7.18 ) | 0.608755034  | NADD_XYLFA ame:<br>Full=Probable<br>nicotinate-nucleotide<br>adenyltransferase<br>ame: Full=Deamido-<br>NAD(+)<br>diphosphorylase ame:<br>Full=Deamido-NAD(+)<br>pyrophosphorylase<br>ame: Full=Nicotinate<br>mononucleotide<br>adenyltransferase<br>Short=<br>adenyltransferase                                                                                             | 222 | 5 | 3 | F:ATP binding; F:nicotinate-<br>nucleotide<br>adenyltransferase activity;<br>P:NAD biosynthetic process                                                                                                                                  | EC:2.7.7.18                | IPR004821 (TIGRFAM);<br>IPR004821 (PFAM); IPR005248<br>(TIGRFAM); IPR014729<br>(G3DSA:3.40.50.GENE3D);<br>PTHR21342 (PANTHER);<br>IPR005248 (HAMAP); SSF52374<br>(SUPERFAMILY)                                                                                                                                                                                                                                                                                                            |
|  |  | electron transport | XF9a_00841 | ubiquinol-cytochrome<br>c reductase, iron-sulfur<br>subunit ( EC:1.10.2.2 )     | 1.012664941  | UCRI_ALLVD ame:<br>Full=Ubiquinol-<br>cytochrome c<br>reductase iron-sulfur<br>subunit ame:<br>Full=Rieske iron-sulfur<br>Short=RISP                                                                                                                                                                                                                                         | 210 | 5 | 7 | F:oxidoreductase activity;<br>C:intracellular membrane-<br>bounded organelle;<br>P:metabolic process;<br>C:cytoplasmic part;<br>C:membrane part;<br>F:binding; P:single-organism<br>process                                              |                            | IPR005805 (PRINTS);<br>IPR036922<br>(G3DSA:2.102.10.GENE3D);<br>IPR006317 (TIGRFAM);<br>IPR019470 (PFAM); IPR017941<br>(PFAM); PTHR10134:SF1<br>(PANTHER); IPR014349<br>(PANTHER); IPR017941<br>(PROSITE_PROFILES);<br>IPR036922 (SUPERFAMILY)                                                                                                                                                                                                                                            |

|               |                                                                         |                                          |            |                                                                                                                                                     |             |                                                                                                               |     |   |   |                                                                                                                                                                                                                                                                                             |                                                                                                                                                                                                                    |
|---------------|-------------------------------------------------------------------------|------------------------------------------|------------|-----------------------------------------------------------------------------------------------------------------------------------------------------|-------------|---------------------------------------------------------------------------------------------------------------|-----|---|---|---------------------------------------------------------------------------------------------------------------------------------------------------------------------------------------------------------------------------------------------------------------------------------------------|--------------------------------------------------------------------------------------------------------------------------------------------------------------------------------------------------------------------|
|               |                                                                         | citric acid cycle                        | XF9a_01739 | hydro-lyases, Fe-S type, tartrate/fumarate subfamily, alpha region/hydro-lyases, Fe-S type, tartrate/fumarate subfamily, beta region ( EC:4.2.1.2 ) | 0.48574495  | FUMB_ECOLI ame: Full=Fumarate hydratase class anaerobic ame: Full=D-tartrate dehydratase ame: Full=Fumarase B | 530 | 5 | 3 | F:hydro-lyase activity; F:binding; P:cellular process                                                                                                                                                                                                                                       | IPR011167 (PIRSF); IPR004646 (TIGRFAM); IPR004647 (PFAM); IPR004646 (PFAM); IPR036660 (G3DSA:3.20.130.GENE3D); IPR004647 (TIGRFAM); PTHR30389 (PANTHER); IPR036660 (SUPERFAMILY)                                   |
|               |                                                                         |                                          |            |                                                                                                                                                     |             |                                                                                                               |     |   |   |                                                                                                                                                                                                                                                                                             |                                                                                                                                                                                                                    |
|               |                                                                         |                                          |            |                                                                                                                                                     |             |                                                                                                               |     |   |   |                                                                                                                                                                                                                                                                                             |                                                                                                                                                                                                                    |
| Cell division |                                                                         |                                          | XF9a_02226 | Predicted integral membrane proteins containing uncharacterized repeats                                                                             | 0.558717254 | ---NA---                                                                                                      | 732 |   |   |                                                                                                                                                                                                                                                                                             | IPR005546 (SMART); G3DSA:2.40.128.130 (GENE3D); IPR005546 (PROSITE_PROFILES); IPR036709 (SUPERFAMILY)                                                                                                              |
|               |                                                                         |                                          | XF9a_00732 | Cell division septal protein                                                                                                                        | 1.009145116 | FTSQ_XANCP ame: Full=Cell division                                                                            | 278 | 5 | 4 | P:cell division; C:integral component of membrane; C:plasma membrane; P:cell cycle                                                                                                                                                                                                          | G3DSA:3.10.20.310 (GENE3D); IPR013685 (PFAM); IPR005548 (PFAM); G3DSA:3.40.50.11690 (GENE3D); IPR026579 (PANTHER); IPR026579 (HAMAP); IPR034746 (PROSITE_PROFILES)                                                 |
|               |                                                                         |                                          | XF9a_01036 | MAF protein                                                                                                                                         | 0.763840866 | Y1124_XYLFA ame: Full=Maf XF_1124                                                                             | 199 | 5 | 1 | C:cytoplasm                                                                                                                                                                                                                                                                                 | IPR003697 (TIGRFAM); IPR029001 (G3DSA:3.90.950.GENE3D); IPR003697 (PFAM); IPR003697 (PIRSF); IPR003697 (PANTHER); PTHR43213:SF7 (PANTHER); IPR003697 (HAMAP); IPR029001 (SUPERFAMILY)                              |
|               |                                                                         |                                          |            |                                                                                                                                                     |             |                                                                                                               |     |   |   |                                                                                                                                                                                                                                                                                             |                                                                                                                                                                                                                    |
| Transport     | The accumulation of this protein is enhanced under phosphate starvation | import nutrientes (phosphate starvation) | XF9a_02027 | phosphate ABC transporter, phosphate-binding protein                                                                                                | -0.50833056 | PSTS_XYLFA ame: Full=Phosphate-binding Short=PBP Flags: Precursor                                             | 364 | 5 | 6 | C:periplasmic space; F:phosphate ion binding; P:cellular response to phosphate starvation; F:ATPase-coupled phosphate ion transmembrane transporter activity; C:ATP-binding cassette (ABC) transporter complex; P:phosphate ion transmembrane transport                                     | IPR005673 (PIRSF); G3DSA:3.40.190.10 (GENE3D); IPR005673 (TIGRFAM); IPR024370 (PFAM); G3DSA:3.40.190.10 (GENE3D); PTHR42996 (PANTHER); PTHR42996:SF2 (PANTHER); PS51257 (PROSITE_PROFILES); SSF53850 (SUPERFAMILY) |
|               |                                                                         | transport ions                           | XF9a_00833 | Mg2+ and Co2+ transporters                                                                                                                          | 0.662012976 | CORA_THEMA ame: Full=Cobalt magnesium transport                                                               | 337 | 5 | 8 | F:magnesium ion binding; P:cobalt ion transport; C:integral component of plasma membrane; F:cobalt ion transmembrane transporter activity; P:protein homooligomerization; F:magnesium ion transmembrane transporter activity; P:magnesium ion transmembrane transport; F:cobalt ion binding | G3DSA:1.20.58.340 (GENE3D); G3DSA:1.20.58.340 (GENE3D); G3DSA:3.30.460.20 (GENE3D); IPR002523 (PFAM); PTHR21535 (PANTHER); PTHR21535:SF33 (PANTHER); SSF143865 (SUPERFAMILY); SSF144083 (SUPERFAMILY)              |
|               |                                                                         | transport sulphate, thiosulphate,        | XF9a_01231 | sulfate ABC transporter, permease protein CysW                                                                                                      | 0.480031167 | CYSW_SYNE7 ame: Full=Sulfate transport system permease                                                        | 319 | 5 | 5 | P:sulfate transport; P:sulfate assimilation; C:plasma membrane;                                                                                                                                                                                                                             | IPR000515 (PFAM); IPR011866 (TIGRFAM); IPR035906 (G3DSA:1.10.3720.GENE3D);                                                                                                                                         |



|                    |                  |                                                                        |            |                                               |             |                                                                                                                                                                                                   |     |   |    |                                                                                                                                                                                                                                                                                                                                                                                                                                                                                         |            |                                                                                                                                                       |
|--------------------|------------------|------------------------------------------------------------------------|------------|-----------------------------------------------|-------------|---------------------------------------------------------------------------------------------------------------------------------------------------------------------------------------------------|-----|---|----|-----------------------------------------------------------------------------------------------------------------------------------------------------------------------------------------------------------------------------------------------------------------------------------------------------------------------------------------------------------------------------------------------------------------------------------------------------------------------------------------|------------|-------------------------------------------------------------------------------------------------------------------------------------------------------|
|                    |                  | selenate, and selenite.                                                |            |                                               |             |                                                                                                                                                                                                   |     |   |    | C:plastid; F:sulfate transmembrane transporter activity                                                                                                                                                                                                                                                                                                                                                                                                                                 |            | IPR005667 (TIGRFAM); IPR011866 (PTHR30406:PANTHER); IPR005667 (PANTHER); IPR000515 (PROSITE_PROFILES); IPR035906 (SUPERFAMILY)                        |
|                    |                  |                                                                        | XF9a_00121 | Predicted permeases                           | 0.588757018 | LPTF_HAEIN ame: Full=Lipopolysaccharide export system permease                                                                                                                                    | 361 | 4 | 17 | P:transmembrane transport; P:deoxyribonucleoside monophosphate biosynthetic process; P:transport; F:thymidine kinase activity; C:plasma membrane; F:nucleotide binding; F:ATP binding; F:metal ion binding; C:membrane; C:integral component of membrane; P:DNA biosynthetic process; P:phosphorylation; F:transferase activity; F:kinase activity; F:lipopolysaccharide-transporting ATPase activity; C:ATP-binding cassette (ABC) transporter complex; P:lipopolysaccharide transport |            | IPR030922 (TIGRFAM); IPR005495 (PFAM); IPR005495 (PANTHER); PTHR33529:SF6 (PANTHER)                                                                   |
|                    |                  | small peptides, secondary amino acids bound to metals, and glutathione | XF9a_02149 | putative oligopeptide transporter, OPT family | 0.466887786 | Y561_HAEIN ame: Full= oligopeptide transporter HI_0561                                                                                                                                            | 653 | 4 | 1  | P:transport                                                                                                                                                                                                                                                                                                                                                                                                                                                                             |            | IPR004814 (TIGRFAM); IPR004813 (PFAM); IPR004813 (TIGRFAM); PTHR31645 (PANTHER); PTHR31645:SF0 (PANTHER)                                              |
|                    |                  | transport sugars, amino acids, organo cations                          | XF9a_02141 | transporter, SSS family                       | 0.601176148 | ACTP_PECPP ame: Full=Cation acetate symporter ame: Full=Acetate permease ame: Full=Acetate transporter                                                                                            | 577 | 5 | 6  | F:tellurite uptake transmembrane transporter activity; F:glycolate transmembrane transporter activity; C:integral component of plasma membrane; P:plasma membrane acetate transport; F:acetate transmembrane transporter activity; P:tellurite transport                                                                                                                                                                                                                                |            | IPR001734 (TIGRFAM); IPR038377 (G3DSA:1.20.1730.GENE3D); IPR001734 (PFAM); PTHR43291 (PANTHER); PTHR43291:SF2 (PANTHER); IPR001734 (PROSITE_PROFILES) |
|                    |                  |                                                                        |            |                                               |             |                                                                                                                                                                                                   |     |   |    |                                                                                                                                                                                                                                                                                                                                                                                                                                                                                         |            |                                                                                                                                                       |
| Response to stress |                  | ascorbate metabolism                                                   | XF9a_02311 | Uncharacterized protein conserved in bacteria | 0.461290917 | DLGD_HAEIG ame: Full=2,3-diketo-L-gulonate reductase Short=2,3-DKG reductase ame: Full=3-dehydro-L-gulonate 2-dehydrogenase                                                                       | 533 | 2 | 7  | F:oxidoreductase activity, acting on the CH-OH group of donors, NAD or NADP as acceptor; C:cytoplasm; F:oxidoreductase activity; P:metabolic process; P:oxidation-reduction process; F:NAD+ binding; F:3-dehydro-L-gulonate 2-dehydrogenase activity                                                                                                                                                                                                                                    |            | IPR016883 (PIRSF); G3DSA:1.50.10.140 (GENE3D); IPR019282 (PFAM); PS51257 (PROSITE_PROFILES)                                                           |
|                    |                  |                                                                        | XF9a_02312 | Stress-induced morphogen (activity unknown)   | 0.814400062 | SUFE1_ARATH ame: Full= chloroplastic mitochondrial ame: Full=Chloroplastic Short= uFE ame: Full= EMBRYO DEFECTIVE 1374 ame: Full= SULFUR E Short= ame: Full= SULFUR E 1 Short= 1 Flags: Precursor | 96  | 5 | 7  | F:protein binding; P:transcription, DNA-templated; C:mitochondrion; C:cytosol; F:enzyme activator activity; P:iron-sulfur cluster assembly                                                                                                                                                                                                                                                                                                                                              |            | G3DSA:3.30.300.90 (GENE3D); IPR002634 (PIRSF); IPR002634 (PFAM); IPR002634 (PANTHER); PTHR12735:SF23 (PANTHER); IPR036065 (SUPERFAMILY)               |
|                    | virulence factor |                                                                        | XF9a_01278 | lactoylglutathione lyase ( EC:4.4.1.5 )       | 0.733008607 | LGUL_PSEPU ame: Full=Lactoylglutathione lyase ame: Full=Aldoketomutase ame: Full=Glyoxalase I                                                                                                     | 163 | 5 | 9  | P:osteoclast differentiation; P:carbohydrate metabolic process; F:zinc ion binding; C:extracellular exosome; P:glutathione metabolic                                                                                                                                                                                                                                                                                                                                                    | EC:4.4.1.5 | IPR029068 (G3DSA:3.10.180.GENE3D); IPR004361 (TIGRFAM); IPR004360 (PFAM); PTHR10374:SF16 (PANTHER);                                                   |

|  |           |  |            |                                   |              |                                                                                                                                    |     |   |   |                                                                                                                                                                                                                                      |  |                                                                                                                                                                                                                                                                                                                                                                                                         |
|--|-----------|--|------------|-----------------------------------|--------------|------------------------------------------------------------------------------------------------------------------------------------|-----|---|---|--------------------------------------------------------------------------------------------------------------------------------------------------------------------------------------------------------------------------------------|--|---------------------------------------------------------------------------------------------------------------------------------------------------------------------------------------------------------------------------------------------------------------------------------------------------------------------------------------------------------------------------------------------------------|
|  |           |  |            |                                   |              | Short=Glx I ame:<br>Full=Ketone-aldehyde mutase ame:<br>Full=Methylglyoxalase ame: Full=S-D-lactoylglutathione methylglyoxal lyase |     |   |   | process; P:methylglyoxal catabolic process to D-lactate via S-lactoyl-glutathione; P:negative regulation of apoptotic process;<br>F:lactoylglutathione lyase activity; P:regulation of transcription from RNA polymerase II promoter |  | PTHR10374 (PANTHER);<br>IPR037523 (PROSITE_PROFILES);<br>IPR029068 (SUPERFAMILY)                                                                                                                                                                                                                                                                                                                        |
|  | chaperone |  | XF9a_00903 | Molecular chaperone, HSP90 family | -0.438068132 | HTPG_XYLFA ame:<br>Full=Chaperone ame:<br>Full=Heat shock ame: Full=High temperature G                                             | 637 | 5 | 5 | F:ATP binding; C:cytoplasm; F:unfolded protein binding; P:protein folding; P:response to stress                                                                                                                                      |  | IPR020575 (PRINTS);<br>IPR003594 (SMART);<br>G3DSA:3.40.50.11260 (GENE3D); G3DSA:3.30.230.80 (GENE3D); IPR003594 (PFAM);<br>IPR037196 (G3DSA:1.20.120.GENE3D);<br>IPR001404 (PIRSF); IPR001404 (PFAM); IPR036890 (G3DSA:3.30.565.GENE3D);<br>IPR001404 (PANTHER);<br>PTHR11528:SF54 (PANTHER);<br>IPR001404 (HAMAP);<br>IPR037196 (SUPERFAMILY);<br>IPR036890 (SUPERFAMILY);<br>IPR020568 (SUPERFAMILY) |
|  | chaperone |  | XF9a_00557 | chaperonin GroL                   | -0.783203974 | CH60_XYLFT ame:<br>Full=60 kDa chaperonin ame: Full= ame: Full=Cpn60                                                               | 547 | 5 | 4 | F:ATP binding; C:cytoplasm; F:unfolded protein binding; P:protein refolding                                                                                                                                                          |  | IPR001844 (PRINTS);<br>IPR027413 (G3DSA:1.10.560.GENE3D);<br>IPR002423 (PFAM); IPR027409 (G3DSA:3.50.7.GENE3D);<br>IPR027410 (G3DSA:3.30.260.GENE3D);<br>IPR001844 (TIGRFAM);<br>PTHR11353:SF169 (PANTHER);<br>PTHR11353 (PANTHER);<br>IPR001844 (HAMAP);<br>IPR027413 (SUPERFAMILY);<br>IPR027409 (SUPERFAMILY);<br>IPR027410 (SUPERFAMILY)                                                            |
|  | chaperone |  | XF9a_00558 | Co-chaperonin GroES (HSP10)       | -0.679042378 | CH10_XYLFT ame:<br>Full=10 kDa chaperonin ame: Full= ame: Full=Cpn10                                                               | 95  | 5 | 7 | F:ATP binding; F:metal ion binding; F:chaperone binding; P:chaperone mediated protein folding requiring cofactor; F:unfolded protein binding; P:response to unfolded protein; C:GroEL-GroES complex                                  |  | IPR020818 (PRINTS);<br>IPR020818 (SMART);<br>IPR037124 (G3DSA:2.30.33.GENE3D);<br>IPR020818 (PFAM);<br>PTHR10772:SF24 (PANTHER);<br>IPR020818 (PANTHER);<br>IPR020818 (HAMAP);<br>IPR011032 (SUPERFAMILY)                                                                                                                                                                                               |
|  | chaperone |  | XF9a_02217 | chaperone protein DnaK            | -0.691999608 | DNAK_XYLFA ame:<br>Full=Chaperone ame:<br>Full=HSP70 ame: Full=Heat shock 70 kDa ame: Full=Heat shock 70                           | 638 | 5 | 3 | F:ATP binding; F:unfolded protein binding; P:protein folding                                                                                                                                                                         |  | IPR013126 (PRINTS);<br>IPR029047 (G3DSA:2.60.34.GENE3D);<br>G3DSA:3.90.640.10 (GENE3D);<br>IPR029048 (G3DSA:1.20.1270.GENE3D);<br>IPR013126 (PFAM); IPR012725 (TIGRFAM); G3DSA:3.30.420.40 (GENE3D); G3DSA:3.30.420.40 (GENE3D); IPR013126 (PANTHER); PTHR19375:SF333 (PANTHER); IPR012725 (HAMAP); SSF53067 (SUPERFAMILY); IPR029047                                                                   |

[illegible]

|  |                       |                       |            |                                                                                                           |              |                                                                                                    |     |   |    |                                                                                                                                                                                                                                                                                                                                                                                                                                                                                                                                                                                                                                                                                                                                         |             |                                                                                                                                                                                                                       |
|--|-----------------------|-----------------------|------------|-----------------------------------------------------------------------------------------------------------|--------------|----------------------------------------------------------------------------------------------------|-----|---|----|-----------------------------------------------------------------------------------------------------------------------------------------------------------------------------------------------------------------------------------------------------------------------------------------------------------------------------------------------------------------------------------------------------------------------------------------------------------------------------------------------------------------------------------------------------------------------------------------------------------------------------------------------------------------------------------------------------------------------------------------|-------------|-----------------------------------------------------------------------------------------------------------------------------------------------------------------------------------------------------------------------|
|  |                       | lysozyme activity     | XF9a_00840 | Soluble lytic murein transglycosylase and related regulatory proteins (some contain LysM/invasin domains) | 0.582319236  | YIBJ_BACSU ame: Full=murein lytic transglycosylase                                                 | 297 | 5 | 6  | P:entry into host via enzymatic degradation of host anatomical structure; P:catabolism by organism of cell wall peptidoglycan in other organism; F:lyase activity; C:virion membrane; P:cellular process; F:lysozyme activity                                                                                                                                                                                                                                                                                                                                                                                                                                                                                                           | EC:3.2.1.17 | G3DSA:1.10.530.10 (GENE3D); IPR008258 (PFAM); PTHR45529 (PANTHER); IPR023346 (SUPERFAMILY)                                                                                                                            |
|  | bacterial pathogeneis | lipase activity       | XF9a_00323 | Esterase/lipase                                                                                           | -0.530879896 | LIPA_PSEAS ame: Full=Lipase A Short=Flags: Precursor                                               | 422 | 1 | 5  | P:lipid catabolic process; P:lipid metabolic process; F:triglyceride lipase activity; C:extracellular region; F:hydrolase activity                                                                                                                                                                                                                                                                                                                                                                                                                                                                                                                                                                                                      |             | IPR029058 (G3DSA:3.40.50.GENE3D); IPR005152 (PIRSF); IPR005152 (PFAM); IPR029058 (SUPERFAMILY)                                                                                                                        |
|  |                       | protease              | XF9a_00171 | Membrane protease subunits, stomatin/prohibitin homologs                                                  | -0.509672157 | QMCA_ECOLI ame: Full=                                                                              | 318 | 5 | 21 | P:positive regulation of cardiolipin metabolic process; P:positive regulation of mitochondrial DNA replication; C:T cell receptor complex; F:receptor binding; F:cardiolipin binding; C:mitochondrial inner membrane; P:mitochondrial calcium ion transport; P:mitochondrion organization; P:mitochondrial ATP synthesis coupled proton transport; C:immunological synapse; P:cellular calcium ion homeostasis; C:mitochondrial intermembrane space; P:positive regulation of mitochondrial membrane potential; F:GTPase binding; C:membrane raft; C:actin cytoskeleton; C:integral component of membrane; C:COP9 signalosome; C:extrinsic component of plasma membrane; P:T cell receptor signaling pathway; P:protein oligomerization |             | IPR001972 (PRINTS); IPR001107 (SMART); G3DSA:3.30.479.30 (GENE3D); IPR001107 (PFAM); IPR032435 (PFAM); PTHR43327 (PANTHER); PTHR43327:SF15 (PANTHER); IPR036013 (SUPERFAMILY)                                         |
|  |                       | Peptidase             | XF9a_01835 | Zn-dependent oligopeptidases ( EC:3.4.15.5 )                                                              | -0.61550075  | DCP_ECOLI ame: Full=Dipeptidyl carboxypeptidase ame: Full=Peptidyl-dipeptidase Dcp                 | 723 | 5 | 9  | F:carboxypeptidase activity; P:cellular macromolecule metabolic process; P:peptide metabolic process; P:proteolysis; C:cytosol; C:outer membrane-bounded periplasmic space; C:intracellular organelle part; F:metalloendopeptidase activity                                                                                                                                                                                                                                                                                                                                                                                                                                                                                             | EC:3.4.24   | IPR001567 (PFAM); G3DSA:1.10.1370.40 (GENE3D); IPR024077 (G3DSA:1.10.1370.GENE3D); PTHR43660 (PANTHER); SSF55486 (SUPERFAMILY)                                                                                        |
|  |                       |                       |            |                                                                                                           |              |                                                                                                    |     |   |    |                                                                                                                                                                                                                                                                                                                                                                                                                                                                                                                                                                                                                                                                                                                                         |             |                                                                                                                                                                                                                       |
|  | Nutrient assimilation | Iron storage proteins | XF9a_00357 | bacterioferritin                                                                                          | 0.564105152  | BFR_ECOL6 ame: Full=Bacterioferritin Short=BFR ame: Full=Cytochrome b-1 ame: Full=Cytochrome b-557 | 154 | 5 | 7  | F:identical protein binding; F:iron ion binding; C:cytosol; P:intracellular sequestering of iron ion; F:ferritinase activity; C:plasma membrane; F:heme binding                                                                                                                                                                                                                                                                                                                                                                                                                                                                                                                                                                         | EC:1.16.3.1 | IPR002024 (PRINTS); IPR002024 (TIGRFAM); IPR002024 (PIRSF); IPR008331 (PFAM); IPR012347 (G3DSA:1.20.1260.GENE3D); PTHR30295:SF0 (PANTHER); PTHR30295 (PANTHER); IPR009040 (PROSITE_PROFILES); IPR009078 (SUPERFAMILY) |
|  |                       | Copper biding         | XF9a_00870 | uncharacterized protein, YfiH family                                                                      | 0.64463894   | POLOX_XYLFA ame: Full=Polyphenol oxidase ame: Full=Multicopper oxidase XF_0940                     | 260 | 5 | 2  | F:copper ion binding; C:cytosol                                                                                                                                                                                                                                                                                                                                                                                                                                                                                                                                                                                                                                                                                                         |             | IPR003730 (PFAM); IPR038371 (G3DSA:3.60.140.GENE3D); IPR003730 (TIGRFAM); PTHR30616:SF2 (PANTHER); IPR003730 (PANTHER); IPR011324 (SUPERFAMILY)                                                                       |

|           |  |  |            |                                                                  |              |                                                                        |      |   |   |                                                                                       |  |                                                                                                                      |
|-----------|--|--|------------|------------------------------------------------------------------|--------------|------------------------------------------------------------------------|------|---|---|---------------------------------------------------------------------------------------|--|----------------------------------------------------------------------------------------------------------------------|
|           |  |  |            |                                                                  |              |                                                                        |      |   |   |                                                                                       |  |                                                                                                                      |
|           |  |  | XF9a_00872 | Uncharacterized protein conserved in bacteria                    | 0.914102568  | Y1259_ARATH ame: Full=DCC family chloroplastic Flags: Precursor        | 150  | 2 | 1 | C:plastoglobule                                                                       |  | IPR007263 (PFAM); PTHR33639:SF2 (PANTHER); PTHR33639 (PANTHER)                                                       |
|           |  |  | XF9a_00125 | Predicted acyltransferases                                       | 0.641265353  | ---NA---                                                               | 380  |   |   |                                                                                       |  | IPR002656 (PFAM); PTHR23028:SF53 (PANTHER); PTHR23028 (PANTHER)                                                      |
|           |  |  | XF9a_01725 | Uncharacterized conserved protein                                | -0.621647161 | Y473_VIBC3 ame: Full=UPF0312 VC0395_0473 VC395_A0785 Flags: Precursor  | 237  | 5 | 4 | P:biological_process; C:periplasmic space; C:cellular_component; F:molecular_function |  | IPR007372 (SMART); IPR007372 (PFAM); IPR036761 (G3DSA:2.40.128.GENE3D); PTHR34406 (PANTHER); IPR036761 (SUPERFAMILY) |
|           |  |  | XF9a_01038 | TIGR02099 family protein                                         | 0.486464537  | YHDP_ECOLIRecName: Full=Uncharacterized protein YhdP; Flags: Precursor | 1291 | 1 |   |                                                                                       |  | IPR032712 (PFAM); IPR011836 (TIGRFAM); IPR025263 (PFAM); IPR011836 (PANTHER)                                         |
|           |  |  | XF9a_01165 | hypothetical protein                                             | -0.451038693 | ---NA---                                                               | 293  |   |   |                                                                                       |  | SSF82171 (SUPERFAMILY)                                                                                               |
|           |  |  | XF9a_01240 | hypothetical protein                                             | 0.760319939  | ---NA---                                                               | 159  |   |   |                                                                                       |  | no IPS match                                                                                                         |
|           |  |  | XF9a_01241 | Uncharacterized protein required for cytochrome oxidase assembly | 0.653412489  | ---NA---                                                               | 387  |   |   |                                                                                       |  | IPR003780 (PFAM); PTHR35457 (PANTHER)                                                                                |
|           |  |  | XF9a_01460 | hypothetical protein                                             | -0.997445841 | ---NA---                                                               | 82   |   |   |                                                                                       |  | no IPS match                                                                                                         |
|           |  |  | XF9a_01903 | hypothetical protein                                             | 0.642951999  | ---NA---                                                               | 182  |   |   |                                                                                       |  | no IPS match                                                                                                         |
|           |  |  | XF9a_01997 | hypothetical protein                                             | 0.662464265  | ---NA---                                                               | 80   |   |   |                                                                                       |  | no IPS match                                                                                                         |
|           |  |  | XF9a_01998 | hypothetical protein                                             | 0.833060274  | ---NA---                                                               | 83   |   |   |                                                                                       |  | no IPS match                                                                                                         |
|           |  |  | XF9a_02098 | hypothetical protein                                             | 0.579292064  | ---NA---                                                               | 149  |   |   |                                                                                       |  | no IPS match                                                                                                         |
|           |  |  | XF9a_02150 | hypothetical protein                                             | 0.743111509  | ---NA---                                                               | 61   |   |   |                                                                                       |  | no IPS match                                                                                                         |
| Total: 69 |  |  | XF9a_00562 | hypothetical protein                                             | 0.708776861  | ---NA---                                                               | 96   |   |   |                                                                                       |  | no IPS match                                                                                                         |

| Class                    | Genic Category | SeqName         | Ncbi Locus tag  | Gene product name            | Description Blast2go                                                                                                    | log2FoldChange | Length | #Hits | e-Value  | sim mean | #GO | GO Names list                                                                                                                                                            | Enzy me Codes list | InterPro IDs                              |
|--------------------------|----------------|-----------------|-----------------|------------------------------|-------------------------------------------------------------------------------------------------------------------------|----------------|--------|-------|----------|----------|-----|--------------------------------------------------------------------------------------------------------------------------------------------------------------------------|--------------------|-------------------------------------------|
| Macromolecule metabolism | DNA metabolism | DNA replication | MMSR116 RS14125 | IS1182 family transposase    | RFC5_PIC1O ame:<br>Full=Replication factor C small subunit Short=RFC small subunit ame: Full=Clamp loader small subunit | 1.952894924    | 478    | 1     | 8.65E-3  | 56%      | 6   | F:nucleotide binding; F:DNA binding; F:ATP binding; F:DNA clamp loader activity; P:DNA replication; C:DNA replication factor C complex                                   |                    | no IPS match                              |
|                          | DNA metabolism | DNA replication | MMSR116 RS04575 | DNA methylase family protein | MTB1_BRUME ame:<br>Full=Modification methylase Short= ame: Full=Adenine-specific methyltransferase ame:                 | -1.460170741   | 444    | 5     | 9.78E-16 | 49%      | 10  | F:nucleic acid binding; F:DNA binding; P:DNA methylation; F:N-methyltransferase activity; P:DNA replication; F:methyltransferase activity; F:transferase activity; P:DNA |                    | IPR002187 (PRINTS);<br>IPR002187 (SMART); |

|  |                   |                                |                 |                                                                          |                                                                                                                                                                                    |              |      |   |          |        |    |                                                                                                                                                                                                                                                                                                                                                                                                                                                                |                                                                                                                                                                                                                           |
|--|-------------------|--------------------------------|-----------------|--------------------------------------------------------------------------|------------------------------------------------------------------------------------------------------------------------------------------------------------------------------------|--------------|------|---|----------|--------|----|----------------------------------------------------------------------------------------------------------------------------------------------------------------------------------------------------------------------------------------------------------------------------------------------------------------------------------------------------------------------------------------------------------------------------------------------------------------|---------------------------------------------------------------------------------------------------------------------------------------------------------------------------------------------------------------------------|
|  |                   |                                |                 |                                                                          | Full=DNA methyltransferase<br>ame: Full= ortholog                                                                                                                                  |              |      |   |          |        |    | methylation on adenine; F:site-specific DNA-<br>methyltransferase (adenine-specific) activity; P:methylation                                                                                                                                                                                                                                                                                                                                                   | IPR015867<br>(G3DSA:3.30.70.<br>GENE3D);<br>IPR002187<br>(PIRSF);<br>IPR002187<br>(PFAM);<br>PTHR301115:SF1<br>7 (PANTHER);<br>IPR002187<br>(PANTHER);<br>IPR002187<br>(PROSITE_PROFI<br>LES); IPR011322<br>(SUPERFAMILY) |
|  | DNA<br>metabolism | DNA replication                | MMSR116_RS06775 | ribonucleoside-diphosphate<br>reductase, adenosylcobalamin-<br>dependent | NRDJ_BRADU ame: Full=Vitamin<br>B12-dependent ribonucleotide<br>reductase ame:<br>Full=Ribonucleoside-<br>diphosphate reductase                                                    | -0.93963467  | 1243 | 5 | 0.00E+00 | 72.8%  | 9  | F:nucleotide binding; F:ribonucleoside-diphosphate<br>reductase activity, thioredoxin disulfide as acceptor;<br>F:cobalamin binding; P:DNA replication;<br>P:deoxyribonucleotide biosynthetic process; P:DNA<br>biosynthetic process; P:oxidation-reduction process;<br>C:ribonucleoside-diphosphate reductase complex; F:cobalt<br>ion binding                                                                                                                | IPR003846<br>(PFAM);<br>PTHR32057<br>(PANTHER);<br>IPR003846<br>(HAMAP)                                                                                                                                                   |
|  | DNA<br>metabolism | DNA replication                | MMSR116_RS05125 | DUF4112 domain-containing<br>protein                                     | DPB2_KLULA ame: Full=DNA<br>polymerase epsilon subunit B<br>ame: Full=DNA polymerase II<br>subunit 2                                                                               | 1.573558555  | 167  | 1 | 9.46E-2  | 48%    | 15 | F:nucleotidyltransferase activity; P:DNA replication; P:DNA-<br>dependent DNA replication; F:double-stranded DNA binding;<br>P:DNA-dependent DNA replication maintenance of fidelity;<br>P:mitotic DNA replication initiation; P:error-prone<br>translesion synthesis; C:epsilon DNA polymerase complex;<br>F:DNA binding; C:nucleus; F:DNA-directed DNA polymerase<br>activity; C:nuclear chromatin; C:cytoplasm; C:cytosol;<br>F:transferase activity        | IPR010707<br>(PIRSF);<br>G3DSA:3.10.540<br>.10 (GENE3D);<br>IPR023361<br>(G3DSA:2.30.27<br>0.GENE3D);<br>IPR010707<br>(PFAM)                                                                                              |
|  | DNA<br>metabolism | DNA replication                | MMSR116_RS14985 | nucleoid-associated protein,<br>YbaB/Ebfc family                         | Y275_METS8 ame:<br>Full=Nucleoid-associated<br>MsiI_Q275                                                                                                                           | 1.159032008  | 107  | 5 | 1.27E-32 | 77%    | 3  | F:DNA binding; C:bacterial<br>nucleoid; C:cytoplasm                                                                                                                                                                                                                                                                                                                                                                                                            | IPR027275<br>(PFAM);<br>G3DSA:2.30.30.<br>240 (GENE3D);<br>PTHR36505<br>(PANTHER);<br>IPR011033<br>(SUPERFAMILY)                                                                                                          |
|  | DNA<br>metabolism | nucleic acid<br>metabolism     | MMSR116_RS06070 | HD domain-containing protein                                             | SPOT_HAEIN ame:<br>Full=Guanosine-3',5'-<br>bis(diphosphate) 3'-<br>pyrophosphohydrolase ame:<br>Full=Penta-phosphate<br>guanosine-3'-<br>pyrophosphohydrolase<br>Short=(ppGpp)ase | 1.453764245  | 164  | 5 | 5.57E-4  | 44.4%  | 16 | P:guanosine tetraphosphate biosynthetic process;<br>P:metabolic process; P:response to starvation; F:guanosine-<br>3',5'-bis(diphosphate) 3'-diphosphatase activity; C:plasma<br>membrane; F:GTP diphosphokinase activity; F:nucleotide<br>binding; F:GTP binding; F:ATP binding; C:cell wall;<br>P:guanosine tetraphosphate metabolic process;<br>P:phosphorylation; F:amino acid binding; F:transferase<br>activity; F:kinase activity; F:hydrolase activity | IPR018648<br>(PFAM)                                                                                                                                                                                                       |
|  | DNA<br>metabolism | DNA repair                     | MMSR116_RS22200 | DNA repair protein MmcB-<br>related protein                              | ---NA---                                                                                                                                                                           | 1.144702594  | 170  |   |          |        |    | EC:4.2<br>.1.1                                                                                                                                                                                                                                                                                                                                                                                                                                                 | IPR001765<br>(SMART);<br>IPR036874<br>(G3DSA:3.40.10<br>50.GENE3D);<br>IPR001765<br>(PFAM);<br>PTHR11002<br>(PANTHER);<br>PTHR11002:SF1<br>3 (PANTHER);<br>IPR036874<br>(SUPERFAMILY)                                     |
|  | DNA<br>metabolism | Plasmid partition<br>protein A | MMSR116_RS02080 | ParA family protein                                                      | VIRC1_AGRRH ame: Full= virC1                                                                                                                                                       | -1.609143843 | 215  | 5 | 2.22E-6  | 47.6%  | 13 | F:ATPase activity; P:nucleic acid phosphodiester bond<br>hydrolysis; F:nucleotide binding; F:DNA binding; F:ATP<br>binding; F:protein binding; P:anion transmembrane<br>transport; P:response to arsenic-containing substance;<br>F:endonuclease activity; P:cation transmembrane transport;<br>P:detoxification of arsenic-containing substance; F:hydrolase<br>activity; F:ATPase-coupled arsenite transmembrane<br>transporter activity                     | IPR008807<br>(PFAM);<br>G3DSA:1.10.10.<br>1550 (GENE3D)                                                                                                                                                                   |
|  | RNA<br>metabolism | ribosomal silencing<br>factors | MMSR116_RS22505 | Uma2 family endonuclease                                                 | Y925_SYNY3RecName:<br>Full=Uncharacterized protein<br>slI0925                                                                                                                      | 1.31493907   | 187  | 3 | 6.95E-4  | 51.67% |    |                                                                                                                                                                                                                                                                                                                                                                                                                                                                | IPR031811<br>(PFAM)                                                                                                                                                                                                       |
|  | RNA<br>metabolism |                                | MMSR116_RS30410 | ribonuclease P protein<br>component                                      | RNPA_RUEPO ame:<br>Full=Ribonuclease P component<br>Short=RNase P Short=R ame:<br>Full= C5                                                                                         | -1.324393197 | 204  | 4 | 1.55E-4  | 61%    | 11 | P:RNA phosphodiester bond hydrolysis, endonucleolytic;<br>P:nucleic acid phosphodiester bond hydrolysis;<br>F:ribonuclease P activity; P:RNA phosphodiester bond<br>hydrolysis; F:RNA binding; P:tRNA processing;                                                                                                                                                                                                                                              | IPR00572<br>(PFAM);<br>IPR036374<br>(G3DSA:3.90.42                                                                                                                                                                        |

|  |                |                                        |                 |                                              |                                                                                               |              |     |   |           |       |   |                                                                                                                                                                                                                                                                                                                                             |                                                                                                                                                                                                                                                                                                                                                                          |
|--|----------------|----------------------------------------|-----------------|----------------------------------------------|-----------------------------------------------------------------------------------------------|--------------|-----|---|-----------|-------|---|---------------------------------------------------------------------------------------------------------------------------------------------------------------------------------------------------------------------------------------------------------------------------------------------------------------------------------------------|--------------------------------------------------------------------------------------------------------------------------------------------------------------------------------------------------------------------------------------------------------------------------------------------------------------------------------------------------------------------------|
|  |                |                                        |                 |                                              |                                                                                               |              |     |   |           |       |   | F:endonuclease activity; F:nuclease activity; F:tRNA binding; P:tRNA 5'-leader removal; F:hydrolase activity                                                                                                                                                                                                                                | 0.GENE3D); PTHR43032:SF3 (PANTHER); PTHR43032 (PANTHER); IPR022867 (HAMAP); IPR006311 (PROSITE_PROFILES); IPR036374 (SUPERFAMILY)                                                                                                                                                                                                                                        |
|  | RNA metabolism | Regulation of gene expression (stress) | MMSR116_RS00525 | ECF subfamily RNA polymerase sigma-24 factor | SIGK_MYCSS ame: Full=RNA polymerase sigma factor ame: Full=Sigma-K factor                     | -1.454061703 | 185 | 5 | 4.17E-29  | 54.6% | 5 | P:regulation of gene expression; F:binding; P:regulation of primary metabolic process; P:regulation of cellular metabolic process; C:cell periphery                                                                                                                                                                                         | PRO0173 (PRINTS); IPR001991 (PFAM); IPR036458 (G3DSA:1.10.38.60.GENE3D); PTHR42865:SF1 (PANTHER); PTHR42865 (PANTHER); IPR023954 (HAMAP); IPR036458 (SUPERFAMILY)                                                                                                                                                                                                        |
|  | RNA metabolism |                                        | MMSR116_RS05315 | transcription termination factor Rho         | RHO_RHOS4 ame: Full=Transcription termination factor Rho ame: Full=ATP-dependent helicase Rho | -1.37334379  | 428 | 5 | 0.00E+00  | 87%   | 6 | F:ATP binding; F:RNA binding; F:RNA-dependent ATPase activity; P:regulation of transcription, DNA-templated; F:helicase activity; P:DNA-templated transcription, termination                                                                                                                                                                | IPR011129 (SMART); IPR003593 (SMART); IPR011112 (SMART); G3DSA:3.40.50.300 (GENE3D); IPR011112 (PFAM); IPR004665 (TIGRFAM); IPR000194 (PFAM); IPR011113 (PFAM); G3DSA:1.10.720.10 (GENE3D); G3DSA:2.40.50.140 (GENE3D); PTHR15184 (PANTHER); IPR004665 (PTHR15184:PANTHER); IPR004665 (HAMAP); IPR027417 (SUPERFAMILY); IPR036269 (SUPERFAMILY); IPR012340 (SUPERFAMILY) |
|  | RNA metabolism | Transcription                          | MMSR116_RS11170 | RNA polymerase sigma factor RpoH             | RPOH_RHIRD ame: Full=RNA polymerase sigma factor ame: Full=RNA polymerase sigma-32 factor     | 1.44455512   | 297 | 5 | 6.21E-152 | 74.8% | 9 | P:transcription initiation from bacterial-type RNA polymerase promoter; F:DNA binding; F:sigma factor activity; F:transcription factor activity, sequence-specific DNA binding; F:zinc ion binding; P:response to heat; C:cytoplasm; P:regulation of transcription, DNA-templated; P:sporulation resulting in formation of a cellular spore | IPR002433 (PRINTS); IPR000183 (PRINTS); IPR022643 (PFAM); IPR029066 (G3DSA:3.20.20.GENE3D); IPR009006 (G3DSA:2.40.37.GENE3D); IPR022644 (PFAM); PTHR11482 (PANTHER); PTHR11482:SF6                                                                                                                                                                                       |

|  |                   |                                                           |                 |                                                      |                                                                                                                 |             |     |   |          |       |   |                                                                                                                                                                                                                                    |  |  |                  |                                                                                                                                                                                                                                                                                                                             |
|--|-------------------|-----------------------------------------------------------|-----------------|------------------------------------------------------|-----------------------------------------------------------------------------------------------------------------|-------------|-----|---|----------|-------|---|------------------------------------------------------------------------------------------------------------------------------------------------------------------------------------------------------------------------------------|--|--|------------------|-----------------------------------------------------------------------------------------------------------------------------------------------------------------------------------------------------------------------------------------------------------------------------------------------------------------------------|
|  |                   |                                                           |                 |                                                      |                                                                                                                 |             |     |   |          |       |   |                                                                                                                                                                                                                                    |  |  |                  | (PANTHER);<br>IPR029066<br>(SUPERFAMILY);<br>IPR009006<br>(SUPERFAMILY)                                                                                                                                                                                                                                                     |
|  | RNA<br>metabolism | Transcription                                             | MMSR116_RS04830 | DNA-binding response<br>regulator                    | ACTR_SINMW ame: Full=Acid<br>tolerance regulatory                                                               | 2.094536867 | 199 | 5 | 5.61E-84 | 82.4% | 6 | P:transcription, DNA-templated; P:phosphorelay<br>signal transduction system; P:regulation of<br>transcription, DNA-templated; F:sequence-<br>specific DNA binding; C:intracellular;<br>F:phosphorelay response regulator activity |  |  |                  | no IPS match                                                                                                                                                                                                                                                                                                                |
|  | RNA<br>metabolism | transcriptional<br>regulator                              | MMSR116_RS05115 | MucR family transcriptional<br>regulator             | MUCR_RHIME ame:<br>Full=Transcriptional regulatory                                                              | 1.216525504 | 180 | 5 | 3.24E-33 | 65.6% | 1 | F:binding                                                                                                                                                                                                                          |  |  |                  | G3DSA:3.40.174<br>0.10 (GENE3D);<br>IPR003774<br>(PFAM);<br>IPR003774<br>(PANTHER);<br>IPR003774<br>(HAMAP);<br>SSF143456<br>(SUPERFAMILY)                                                                                                                                                                                  |
|  | RNA<br>metabolism | transcriptional<br>regulator                              | MMSR116_RS26055 | MucR family transcriptional<br>regulator             | MUCR_RHIME ame:<br>Full=Transcriptional regulatory                                                              | 1.191641256 | 153 | 5 | 4.79E-38 | 64.2% | 1 | F:binding                                                                                                                                                                                                                          |  |  | EC:3.4<br>.18    | IPR038063<br>(G3DSA:2.40.44<br>0.GENE3D);<br>IPR005490<br>(PFAM);<br>PTHR30582:SF2<br>4 (PANTHER);<br>PTHR30582<br>(PANTHER);<br>PSS1257<br>(PROSITE_PROFI<br>LES); IPR038063<br>(SUPERFAMILY)                                                                                                                              |
|  | RNA<br>metabolism | transcriptional<br>regulator                              | MMSR116_RS18630 | MucR family transcriptional<br>regulator             | MUCR_RHIME ame:<br>Full=Transcriptional regulatory                                                              | 1.267343676 | 153 | 5 | 6.5E-30  | 64.4% | 1 | F:binding                                                                                                                                                                                                                          |  |  |                  | IPR001789<br>(SMART);<br>IPR001789<br>(PFAM);<br>IPR002197<br>(PFAM);<br>G3DSA:1.10.10.<br>60 (GENE3D);<br>G3DSA:3.40.50.<br>2300 (GENE3D);<br>PTHR32071:SF5<br>1 (PANTHER);<br>PTHR32071<br>(PANTHER);<br>IPR001789<br>(PROSITE_PROFI<br>LES); IPR011006<br>(SUPERFAMILY)                                                  |
|  | RNA<br>metabolism | transcriptional<br>regulator                              | MMSR116_RS07440 | MucR family transcriptional<br>regulator             | ROS_RHIRD ame:<br>Full=Transcriptional regulatory<br>ros                                                        | 1.99224614  | 164 | 5 | 9.62E-27 | 64%   | 1 | F:binding                                                                                                                                                                                                                          |  |  | EC:1.1<br>.99.14 | IPR004113<br>(PFAM);<br>IPR016171<br>(G3DSA:1.10.45.<br>GENE3D);<br>G3DSA:3.30.465<br>.40 (GENE3D);<br>G3DSA:3.30.70.<br>2740 (GENE3D);<br>IPR006094<br>(PFAM);<br>PTHR42934:SF1<br>(PANTHER);<br>PTHR42934<br>(PANTHER);<br>IPR016166<br>(PROSITE_PROFI<br>LES); IPR036318<br>(SUPERFAMILY);<br>IPR016164<br>(SUPERFAMILY) |
|  | RNA<br>metabolism | transcriptional<br>regulator - metal<br>sensing regulator | MMSR116_RS14485 | MerR family DNA-binding<br>transcriptional regulator | ZNTR_ECO57 ame: Full=HTH-<br>type transcriptional regulator<br>ame: Full=Zn(II)-responsive<br>regulator of zntA | 1.183609797 | 140 | 5 | 1.45E-24 | 58.2% | 3 | F:transcription factor activity, sequence-specific<br>DNA binding; P:positive regulation of<br>transcription, DNA-templated; F:binding                                                                                             |  |  |                  | IPR021273<br>(PFAM)                                                                                                                                                                                                                                                                                                         |



|  |                    |                                             |                 |                                                                                               |                                                                                                                                                                                                                                                                                                                                                                             |              |     |   |           |       |   |                                                                                                                                                                                                                                                                                                             |              |                                                                                                                                                                      |
|--|--------------------|---------------------------------------------|-----------------|-----------------------------------------------------------------------------------------------|-----------------------------------------------------------------------------------------------------------------------------------------------------------------------------------------------------------------------------------------------------------------------------------------------------------------------------------------------------------------------------|--------------|-----|---|-----------|-------|---|-------------------------------------------------------------------------------------------------------------------------------------------------------------------------------------------------------------------------------------------------------------------------------------------------------------|--------------|----------------------------------------------------------------------------------------------------------------------------------------------------------------------|
|  | RNA metabolism     | transcriptional regulator - stress response | MMSR116_RS00375 | Crp/Fnr family transcriptional regulator                                                      | FNRL_RHOS4 ame: Full=Transcriptional activator                                                                                                                                                                                                                                                                                                                              | 1.364127111  | 246 | 5 | 1.96E-13  | 44.8% | 6 | F:DNA binding; F:transcription factor activity, sequence-specific DNA binding; P:transcription, DNA-templated; P:regulation of transcription, DNA-templated; P:nitrogen fixation; C:intracellular                                                                                                           | EC:1.8 .4.11 | IPR036509 (G3DSA:3.30.10.60.GENE3D); IPR002569 (PFAM); IPR002569 (TIGRFAM); PTHR42799 (PANTHER); PTHR42799:SF6 (PANTHER); IPR002569 (HAMAP); IPR036509 (SUPERFAMILY) |
|  | RNA metabolism     | transcriptional regulator - stress response | MMSR116_RS30165 | bifunctional DNA-binding transcriptional regulator/O6-methylguanine-DNA methyltransferase Ada | ADA_ECOLI ame: Full=Bifunctional transcriptional activator DNA repair enzyme Ada ame: Full=Regulatory of adaptive response Includes: ame: Full=Methylphosphotriester-DNA--cysteine S-methyltransferase ame: Full=Methylphosphotriester-DNA methyltransferase Includes: ame: Full=Methylated-DNA--cysteine methyltransferase ame: Full=O6-methylguanine-DNA alkyltransferase | 1.631496098  | 369 | 5 | 7.49E-115 | 64.8% | 8 | P:DNA dealkylation involved in DNA repair; F:zinc ion binding; F:protein binding; P:DNA demethylation; P:response to nitrosative stress; F:methylated-DNA-[protein]-cysteine S-methyltransferase activity; F:damaged DNA binding; C:plasma membrane                                                         | EC:3.6 .1.3  | IPR002586 (PFAM); IPR010223 (TIGRFAM); G3DSA:3.40.50.300 (GENE3D); IPR025501 (PIRSF); PTHR43384 (PANTHER); PTHR43384:SF1 (PANTHER); IPR027417 (SUPERFAMILY)          |
|  | RNA metabolism     | transcription                               | MMSR116_RS23260 | methyltransferase domain-containing protein                                                   | ARSR_ECOLI ame: Full=Arsenical resistance operon repressor                                                                                                                                                                                                                                                                                                                  | 1.569178409  | 336 | 5 | 2.47E-12  | 62.2% | 4 | F:DNA binding; P:transcription, DNA-templated; P:response to arsenic-containing substance; P:regulation of transcription, DNA-templated                                                                                                                                                                     |              | no IPS match                                                                                                                                                         |
|  | RNA metabolism     | transcriptional regulator                   | MMSR116_RS08620 | transcriptional regulator                                                                     | YDEP_BACSU ame: Full=Uncharacterized HTH-type transcriptional regulator                                                                                                                                                                                                                                                                                                     | 1.71309569   | 121 | 5 | 3.58E-22  | 61%   | 3 | F:DNA binding; P:transcription, DNA-templated; P:regulation of transcription, DNA-templated                                                                                                                                                                                                                 |              | no IPS match                                                                                                                                                         |
|  | RNA metabolism     | transcriptional regulator                   | MMSR116_RS06015 | DNA-binding response regulator                                                                | OMPR_ECOLI ame: Full=Transcriptional regulatory                                                                                                                                                                                                                                                                                                                             | 1.417934447  | 239 | 5 | 3.89E-55  | 59.8% | 7 | F:transcription factor activity, sequence-specific DNA binding; F:identical protein binding; P:negative regulation of transcription, DNA-templated; P:positive regulation of transcription, DNA-templated; P:phosphorelay signal transduction system; C:cytosol; F:phosphorelay response regulator activity |              | IPR008258 (PFAM); G3DSA:1.10.530.10 (GENE3D); IPR023346 (SUPERFAMILY)                                                                                                |
|  | RNA metabolism     | Transcription                               | MMSR116_RS28615 | nitrogen regulatory protein P-II                                                              | GLNB_RHILO ame: Full=Nitrogen regulatory P-II                                                                                                                                                                                                                                                                                                                               | 1.048806401  | 112 | 5 | 9.09E-66  | 91.8% | 7 | F:nucleotide binding; P:transcription, DNA-templated; P:regulation of catalytic activity; P:regulation of transcription, DNA-templated; P:regulation of nitrogen utilization; P:nitrogen fixation; F:enzyme regulator activity                                                                              |              | IPR002563 (PFAM); IPR012349 (G3DSA:2.30.11.0.GENE3D); PTHR43567:SF1 (PANTHER); PTHR43567 (PANTHER); SSF50475 (SUPERFAMILY)                                           |
|  | Protein metabolism | Translation                                 | MMSR116_03410   | peptide chain release factor 2                                                                | RF2_MAGSA ame: Full=Peptide chain release factor 2 Short=RF-2                                                                                                                                                                                                                                                                                                               | -1.263522363 | 375 | 5 | 4.33E-176 | 76%   | 3 | P:translational termination; C:cytoplasm; F:translation release factor activity, codon specific                                                                                                                                                                                                             |              | no IPS match                                                                                                                                                         |
|  | Protein metabolism | Translation                                 | MMSR116_RS20855 | 50S ribosomal protein L28                                                                     | RL28_METRJ ame: Full=50S ribosomal L28                                                                                                                                                                                                                                                                                                                                      | -1.750003006 | 100 | 5 | 8.81E-66  | 92.6% | 3 | F:structural constituent of ribosome; C:ribosome; P:translation                                                                                                                                                                                                                                             |              | IPR003684 (PFAM)                                                                                                                                                     |
|  | Protein metabolism | Translation                                 | MMSR116_RS10555 | 30S ribosomal protein S20                                                                     | RS20_METRJ ame: Full=30S ribosomal S20                                                                                                                                                                                                                                                                                                                                      | -1.264945184 | 88  | 5 | 2.18E-48  | 94.2% | 4 | F:structural constituent of ribosome; C:ribosome; F:rRNA binding; P:translation                                                                                                                                                                                                                             | EC:1.3 .99.7 | G3DSA:2.40.110.10 (GENE3D); IPR009075 (PFAM); IPR013786 (PFAM); IPR006091 (PFAM); G3DSA:1.20.140.10 (GENE3D); IPR037069 (G3DSA:1.10.54                               |

|  |                       |                   |                 |                                                      |                                                                                          |              |     |   |               |       |    |                                                                                                                                                                                                                                                                                                                           |  |  |                |                                                                                                                                                                                                                                                                                                                                                                                                                              |
|--|-----------------------|-------------------|-----------------|------------------------------------------------------|------------------------------------------------------------------------------------------|--------------|-----|---|---------------|-------|----|---------------------------------------------------------------------------------------------------------------------------------------------------------------------------------------------------------------------------------------------------------------------------------------------------------------------------|--|--|----------------|------------------------------------------------------------------------------------------------------------------------------------------------------------------------------------------------------------------------------------------------------------------------------------------------------------------------------------------------------------------------------------------------------------------------------|
|  |                       |                   |                 |                                                      |                                                                                          |              |     |   |               |       |    |                                                                                                                                                                                                                                                                                                                           |  |  |                | 0.GENE3D);<br>PTHR42807<br>(PANTHER);<br>IPR009100<br>(SUPERFAMILY);<br>IPR036250<br>(SUPERFAMILY)                                                                                                                                                                                                                                                                                                                           |
|  | Protein<br>metabolism | translation       | MMSR116_RS03090 | 30S ribosomal protein S21                            | RS21_METNO ame: Full=30S<br>ribosomal S21                                                | -1.164760906 | 111 | 5 | 2.07E-28      | 90.8% | 3  | C:ribosomal subunit;<br>F:structural constituent of<br>ribosome; P:translation                                                                                                                                                                                                                                            |  |  | EC:1.2<br>.4.2 | IPR005475<br>(SMART);<br>IPR032106<br>(PFAM);<br>IPR001017<br>(PFAM);<br>G3DSA:3.40.50.<br>11610<br>(GENE3D);<br>IPR011603<br>(TIGRFAM);<br>G3DSA:1.10.287<br>.1150<br>(GENE3D);<br>G3DSA:3.40.50.<br>12470<br>(GENE3D);<br>IPR031717<br>(PFAM);<br>IPR005475<br>(PFAM);<br>IPR011603<br>(PIRSF);<br>G3DSA:3.40.50.<br>970 (GENE3D);<br>IPR011603<br>(PANTHER);<br>IPR029061<br>(SUPERFAMILY);<br>IPR029061<br>(SUPERFAMILY) |
|  | Protein<br>metabolism | translation       | MMSR116_RS25435 | RNA helicase                                         | RHLE_ECOLI ame: Full=ATP-<br>dependent RNA helicase                                      | -1.643055132 | 511 | 5 | 1.61E-<br>119 | 63.6% | 9  | F:nucleotide binding; P:response to heat; F:RNA strand-<br>exchange activity; F:RNA strand annealing activity; F:ATP-<br>dependent 5'-3' RNA helicase activity; P:RNA secondary<br>structure unwinding; C:cytosol; P:ribosome assembly; F:ATP-<br>dependent 3'-5' RNA helicase activity                                   |  |  |                | IPR010105<br>(TIGRFAM);<br>IPR036942<br>(G3DSA:2.40.17<br>0.GENE3D);<br>IPR037066<br>(G3DSA:2.170.1<br>30.GENE3D);<br>IPR000531<br>(PFAM);<br>IPR012910<br>(PFAM);<br>PTHR32552:SF6<br>5 (PANTHER);<br>PTHR32552<br>(PANTHER);<br>SSF56935<br>(SUPERFAMILY)                                                                                                                                                                  |
|  | Protein<br>metabolism | translation       | MMSR116_RS25130 | quinoprotein dehydrogenase-<br>associated SoxYZ-like | SYP_HALOH ame: Full=Proline--<br>tRNA ligase ame: Full=Prolyl-<br>tRNA synthetase Short= | 1.795242569  | 279 | 1 | 7.26E-2       | 38%   | 11 | F:nucleotide binding; P:tRNA aminoacylation for protein<br>translation; F:ATP binding; F:aminoacyl-tRNA ligase activity;<br>C:cytoplasm; P:regulation of translational fidelity; F:proline-<br>tRNA ligase activity; F:aminoacyl-tRNA editing activity;<br>P:prolyl-tRNA aminoacylation; F:ligase activity; P:translation |  |  |                | IPR029032<br>(G3DSA:1.20.12<br>90.GENE3D);<br>PTHR34846<br>(PANTHER);<br>PTHR34846:SF2<br>(PANTHER);<br>IPR029032<br>(SUPERFAMILY)                                                                                                                                                                                                                                                                                           |
|  | Protein<br>metabolism | nucleotide biding | MMSR116_RS12120 | ATP-dependent helicase                               | DEAD_BUCBP ame: Full=ATP-<br>dependent RNA helicase ame:<br>Full=Cold-shock DEAD box A   | -1.280011433 | 584 | 5 | 5.67E-69      | 48.2% | 3  | F:nucleic acid binding;<br>F:helicase activity;<br>P:cellular process                                                                                                                                                                                                                                                     |  |  |                | IPR030395<br>(PFAM);<br>IPR017946<br>(G3DSA:3.20.20.<br>GENE3D);<br>PTHR43620:SF7<br>(PANTHER);<br>PTHR43620<br>(PANTHER);<br>IPR030395<br>(PROSITE PROFI                                                                                                                                                                                                                                                                    |

|                         |                    |                                     |                 |                                             |                                                                                                                                                                                  |              |     |   |           |       |    |                                                                                                                                                                                                                                                                                                                                                                                                                                                                                                                                                                                                                                                                        |  |  |  |  |                                                                 |                                                                                                                                            |
|-------------------------|--------------------|-------------------------------------|-----------------|---------------------------------------------|----------------------------------------------------------------------------------------------------------------------------------------------------------------------------------|--------------|-----|---|-----------|-------|----|------------------------------------------------------------------------------------------------------------------------------------------------------------------------------------------------------------------------------------------------------------------------------------------------------------------------------------------------------------------------------------------------------------------------------------------------------------------------------------------------------------------------------------------------------------------------------------------------------------------------------------------------------------------------|--|--|--|--|-----------------------------------------------------------------|--------------------------------------------------------------------------------------------------------------------------------------------|
|                         |                    |                                     |                 |                                             |                                                                                                                                                                                  |              |     |   |           |       |    |                                                                                                                                                                                                                                                                                                                                                                                                                                                                                                                                                                                                                                                                        |  |  |  |  |                                                                 | LES); IPR017946 (SUPERFAMILY)                                                                                                              |
|                         | Protein metabolism | Protein folding                     | MMSR116_RS20870 | molecular chaperone DnaJ                    | YCB2_PSEDE ame: Full=Uncharacterized kDa in cobS 5 region ame: Full=ORF2                                                                                                         | 1.080068559  | 206 | 5 | 3.42E-43  | 65.8% | 1  | F:ion binding                                                                                                                                                                                                                                                                                                                                                                                                                                                                                                                                                                                                                                                          |  |  |  |  |                                                                 | IPR000100 (PFAM); IPR000100 (TIGRFAM); IPR014721 (G3DSA:3.30.23.0.GENE3D); IPR000100 (PANTHER); IPR000100 (HAMAP); IPR020568 (SUPERFAMILY) |
|                         | Protein metabolism | Protein biding                      | MMSR116_RS22230 | tetratricopeptide repeat-containing protein | Y940_METJA ame: Full=TPR repeat-containing MJ0940                                                                                                                                | -1.21586595  | 290 | 5 | 1.21E-17  | 47.6% | 19 | P:positive regulation of cellular protein metabolic process; F:UDP-glycosyltransferase activity; P:response to organic substance; P:carbohydrate derivative metabolic process; P:regulation of biosynthetic process; P:response to oxygen-containing compound; P:regulation of carbohydrate metabolic process; C:nucleus; F:protein binding; P:cellular glucose homeostasis; P:rhythmic process; C:cytoplasm; P:regulation of protein phosphorylation; P:histone modification; P:regulation of gene expression; P:cellular response to stimulus; F:N-acetyltransferase activity; P:negative regulation of protein modification process; P:peptidyl-lysine modification |  |  |  |  | IPR032807 (PFAM); PTHR32309 (PANTHER); PTHR32309:SF13 (PANTHER) |                                                                                                                                            |
|                         | Protein metabolism | Post translation modification       | MMSR116_RS02310 | isoprenylcysteine carboxylmethyltransferase | NRM_XENLA ame: Full=Nurim ame: Full=Nuclear envelope membrane ame: Full=Nuclear rim                                                                                              | 1.828852014  | 244 | 5 | 1.21E-10  | 48.6% | 2  | C:nucleus; C:membrane                                                                                                                                                                                                                                                                                                                                                                                                                                                                                                                                                                                                                                                  |  |  |  |  |                                                                 | IPR018661 (PFAM)                                                                                                                           |
|                         | Protein metabolism | novel chaperonins                   | MMSR116_RS13530 | ABC-1 domain protein                        | COQ8_YEAST ame: Full=Atypical kinase mitochondrial ame: Full=Activity of bc1 complex 1 ame: Full=Coenzyme Q 8 ame: Full=Ubiquinone biosynthesis COQ8 Flags: Precursor            | 1.153805314  | 453 | 5 | 1.13E-31  | 47.8% | 6  | C:mitochondrial part; C:membrane; P:phosphorylation; F:binding; F:kinase activity; P:organic substance metabolic process                                                                                                                                                                                                                                                                                                                                                                                                                                                                                                                                               |  |  |  |  |                                                                 | IPR027405 (G3DSA:1.10.10.0.GENE3D); IPR009282 (PFAM); IPR027405 (SUPERFAMILY)                                                              |
|                         | Protein metabolism | chaperone                           | MMSR116_RS29890 | cytochrome c maturation protein CcmE        | CCME_METRJ ame: Full=Cytochrome c-type biogenesis ame: Full=Cytochrome c maturation E ame: Full=Heme chaperone                                                                   | 1.120750101  | 170 | 5 | 1.78E-102 | 90.4% | 5  | F:metal ion binding; C:integral component of membrane; P:protein-heme linkage; P:cytochrome complex assembly; C:plasma membrane                                                                                                                                                                                                                                                                                                                                                                                                                                                                                                                                        |  |  |  |  |                                                                 | IPR013785 (G3DSA:3.20.20.0.GENE3D); IPR008567 (PFAM); IPR008567 (PANTHER); PTHR37418:SF2 (PANTHER)                                         |
| Intermediary metabolism | Energy Production  | electron transfer activity          | MMSR116_RS19245 | ATP synthase F0 subunit C                   | ATPL_JANSC ame: Full=ATP synthase subunit c ame: Full=ATP synthase F(0) sector subunit c ame: Full=F-type ATPase subunit c Short=F-type ATPase subunit c ame: Full=Lipid-binding | -1.808372095 | 75  | 5 | 3.18E-6   | 73.4% | 13 | P:proton transport; P:ATP hydrolysis coupled proton transport; C:proton-transporting two-sector ATPase complex, proton-transporting domain; F:hydrogen ion transmembrane transporter activity; F:lipid binding; P:ATP biosynthetic process; P:transport; C:plasma membrane; P:ion transport; C:proton-transporting ATP synthase complex, coupling factor F(0); C:membrane; C:integral component of membrane; P:ATP synthesis coupled proton transport                                                                                                                                                                                                                  |  |  |  |  |                                                                 | IPR009531 (PFAM)                                                                                                                           |
|                         | Energy Production  | electron transfer activity          | MMSR116_RS22760 | (2Fe-2S)-binding protein                    | IORA_BREDI ame: Full=Isouquinoline 1-oxidoreductase subunit alpha                                                                                                                | 1.677697423  | 151 | 5 | 3.00E-51  | 57.8% | 6  | P:aromatic compound catabolic process; F:oxidoreductase activity, acting on CH or CH2 groups; C:cytoplasm; F:oxidoreductase activity, acting on the aldehyde or oxo group of donors; P:oxidation-reduction process; F:2 iron, 2 sulfur cluster binding                                                                                                                                                                                                                                                                                                                                                                                                                 |  |  |  |  |                                                                 | IPR009593 (PIRSF); IPR009593 (PFAM)                                                                                                        |
|                         | Energy Production  | unknown fuction iron sufler cluster | MMSR116_RS28290 | YdiU family protein                         | Y5402_METPB ame: Full=UPF0061 Mpop_5402                                                                                                                                          | 1.178340739  | 489 | 5 | 0.00E+00  | 80%   |    |                                                                                                                                                                                                                                                                                                                                                                                                                                                                                                                                                                                                                                                                        |  |  |  |  |                                                                 | IPR012910 (PFAM); IPR010105 (TIGRFAM); IPR037066 (G3DSA:2.170.130.GENE3D); IPR000531 (PFAM); IPR036942 (G3DSA:2.40.17.0.GENE3D); PTHR32552 |

|  |  |  |  |  |  |  |  |  |  |  |  |  |  |  |  |  |  |  |  |  |  |  |  |  |  |  |  |  |  |  |  |  |  |  |  |  |  |  |  |  |  |  |  |  |  |  |  |  |  |  |  |  |  |  |  |  |  |  |  |  |  |  |  |  |  |  |  |  |  |  |  |  |  |  |  |  |  |  |  |  |  |  |  |  |  |  |  |  |  |  |  |  |  |  |  |  |  |  |  |  |  |  |  |  |  |  |  |  |  |  |  |  |  |  |  |  |  |  |  |  |  |  |  |  |  |  |  |  |  |  |  |  |  |  |  |  |  |  |  |  |  |  |  |  |  |  |  |  |  |  |  |  |  |  |  |  |  |  |  |  |  |  |  |  |  |  |  |  |  |  |  |  |  |  |  |  |  |  |  |  |  |  |  |  |  |  |  |  |  |  |  |  |  |  |  |  |  |  |  |  |  |  |  |  |  |  |  |  |  |  |  |  |  |  |  |  |  |  |  |  |  |  |  |  |  |  |  |  |  |  |  |  |  |  |  |  |  |  |  |  |  |  |  |  |  |  |  |  |  |  |  |  |  |  |  |  |  |  |  |  |  |  |  |  |  |  |  |  |  |  |  |  |  |  |  |  |  |  |  |  |  |  |  |  |  |  |  |  |  |  |  |  |  |  |  |  |  |  |  |  |  |  |  |  |  |  |  |  |  |  |  |  |  |  |  |  |  |  |  |  |  |  |  |  |  |  |  |  |  |  |  |  |  |  |  |  |  |  |  |  |  |  |  |  |  |  |  |  |  |  |  |  |  |  |  |  |  |  |  |  |  |  |  |  |  |  |  |  |  |  |  |  |  |  |  |  |  |  |  |  |  |  |  |  |  |  |  |  |  |  |  |  |  |  |  |  |  |  |  |  |  |  |  |  |  |  |  |  |  |  |  |  |  |  |  |  |  |  |  |  |  |  |  |  |  |  |  |  |  |  |  |  |  |  |  |  |  |  |  |  |  |  |  |  |  |  |  |  |  |  |  |  |  |  |  |  |  |  |  |  |  |  |  |  |  |  |  |  |  |  |  |  |  |  |  |  |  |  |  |  |  |  |  |  |  |  |  |  |  |  |  |  |  |  |  |  |  |  |  |  |  |  |  |  |  |  |  |  |  |  |  |  |  |  |  |  |  |  |  |  |  |  |  |  |  |  |  |  |  |  |  |  |  |  |  |  |  |  |  |  |  |  |  |  |  |  |  |  |  |  |  |  |  |  |  |  |  |  |  |  |  |  |  |  |  |  |  |  |  |  |  |  |  |  |  |  |  |  |  |  |  |  |  |  |  |  |  |  |  |  |  |  |  |  |  |  |  |  |  |  |  |  |  |  |  |  |  |  |  |  |  |  |  |  |  |  |  |  |  |  |  |  |  |  |  |  |  |  |  |  |  |  |  |  |  |  |  |  |  |  |  |  |  |  |  |  |  |  |  |  |  |  |  |  |  |  |  |  |  |  |  |  |  |  |  |  |  |  |  |  |  |  |  |  |  |  |  |  |  |  |  |  |  |  |  |  |  |  |  |  |  |  |  |  |  |  |  |  |  |  |  |  |  |  |  |  |  |  |  |  |  |  |  |  |  |  |  |  |  |  |  |  |  |  |  |  |  |  |  |  |  |  |  |  |  |  |  |  |  |  |  |  |  |  |  |  |  |  |  |  |  |  |  |  |  |  |  |  |  |  |  |  |  |  |  |  |  |  |  |  |  |  |  |  |  |  |  |  |  |  |  |  |  |  |  |  |  |  |  |  |  |  |  |  |  |  |  |  |  |  |  |  |  |  |  |  |  |  |  |  |  |  |  |  |  |  |  |  |  |  |  |  |  |  |  |  |  |  |  |  |  |  |  |  |  |  |  |  |  |  |  |  |  |  |  |  |  |  |  |  |  |  |  |  |  |  |  |  |  |  |  |  |  |  |  |  |  |  |  |  |  |  |  |  |  |  |  |  |  |  |  |  |  |  |  |  |  |  |  |  |  |  |  |  |  |  |  |  |  |  |  |  |  |  |  |  |  |  |  |  |  |  |  |  |  |  |  |  |  |  |  |  |  |  |  |  |  |  |  |  |  |  |  |  |  |  |  |  |  |  |  |  |  |  |  |  |  |  |  |  |  |  |  |  |  |  |  |  |  |  |  |  |  |  |  |  |  |  |  |  |  |  |  |  |  |  |  |  |  |  |  |  |  |  |  |  |  |  |  |  |  |  |  |  |  |  |  |  |  |  |  |  |  |  |  |  |  |  |  |  |  |  |  |  |  |  |  |  |  |  |  |  |  |  |  |  |  |  |  |  |  |  |  |  |  |  |  |  |  |  |  |  |  |  |  |  |  |  |  |  |  |  |  |  |  |  |  |  |  |  |  |  |  |  |  |  |  |  |  |  |  |  |  |  |  |  |  |  |  |  |  |  |  |  |  |  |  |  |  |  |  |  |  |  |  |  |  |  |  |  |  |  |  |  |  |  |  |  |  |  |  |  |  |  |  |  |  |  |  |  |  |  |  |  |  |  |  |  |  |  |  |  |  |  |  |  |  |  |  |  |  |  |  |  |  |  |  |  |  |  |  |  |  |  |  |  |  |  |  |  |  |  |  |  |  |  |  |  |  |  |  |  |  |  |  |  |  |  |  |  |  |  |  |  |  |  |  |  |  |  |  |  |  |  |  |  |  |  |  |  |  |  |  |  |  |  |  |  |  |  |  |  |  |  |  |  |  |  |  |  |  |  |  |  |  |  |  |  |  |  |  |  |  |  |  |  |  |  |  |  |  |  |  |  |  |  |  |  |  |  |  |  |  |  |  |  |  |  |  |  |  |  |  |  |  |  |  |  |  |  |  |  |  |  |  |  |  |  |  |  |  |  |  |  |  |  |  |  |  |  |  |  |  |  |  |  |  |  |  |  |  |  |  |  |  |  |  |  |  |  |  |  |  |  |  |  |  |  |  |  |  |  |  |  |  |  |  |  |  |  |  |  |  |  |  |  |  |  |  |  |  |  |  |  |  |  |  |  |  |  |  |  |  |  |  |  |  |  |  |  |  |  |  |  |    |
|--|--|--|--|--|--|--|--|--|--|--|--|--|--|--|--|--|--|--|--|--|--|--|--|--|--|--|--|--|--|--|--|--|--|--|--|--|--|--|--|--|--|--|--|--|--|--|--|--|--|--|--|--|--|--|--|--|--|--|--|--|--|--|--|--|--|--|--|--|--|--|--|--|--|--|--|--|--|--|--|--|--|--|--|--|--|--|--|--|--|--|--|--|--|--|--|--|--|--|--|--|--|--|--|--|--|--|--|--|--|--|--|--|--|--|--|--|--|--|--|--|--|--|--|--|--|--|--|--|--|--|--|--|--|--|--|--|--|--|--|--|--|--|--|--|--|--|--|--|--|--|--|--|--|--|--|--|--|--|--|--|--|--|--|--|--|--|--|--|--|--|--|--|--|--|--|--|--|--|--|--|--|--|--|--|--|--|--|--|--|--|--|--|--|--|--|--|--|--|--|--|--|--|--|--|--|--|--|--|--|--|--|--|--|--|--|--|--|--|--|--|--|--|--|--|--|--|--|--|--|--|--|--|--|--|--|--|--|--|--|--|--|--|--|--|--|--|--|--|--|--|--|--|--|--|--|--|--|--|--|--|--|--|--|--|--|--|--|--|--|--|--|--|--|--|--|--|--|--|--|--|--|--|--|--|--|--|--|--|--|--|--|--|--|--|--|--|--|--|--|--|--|--|--|--|--|--|--|--|--|--|--|--|--|--|--|--|--|--|--|--|--|--|--|--|--|--|--|--|--|--|--|--|--|--|--|--|--|--|--|--|--|--|--|--|--|--|--|--|--|--|--|--|--|--|--|--|--|--|--|--|--|--|--|--|--|--|--|--|--|--|--|--|--|--|--|--|--|--|--|--|--|--|--|--|--|--|--|--|--|--|--|--|--|--|--|--|--|--|--|--|--|--|--|--|--|--|--|--|--|--|--|--|--|--|--|--|--|--|--|--|--|--|--|--|--|--|--|--|--|--|--|--|--|--|--|--|--|--|--|--|--|--|--|--|--|--|--|--|--|--|--|--|--|--|--|--|--|--|--|--|--|--|--|--|--|--|--|--|--|--|--|--|--|--|--|--|--|--|--|--|--|--|--|--|--|--|--|--|--|--|--|--|--|--|--|--|--|--|--|--|--|--|--|--|--|--|--|--|--|--|--|--|--|--|--|--|--|--|--|--|--|--|--|--|--|--|--|--|--|--|--|--|--|--|--|--|--|--|--|--|--|--|--|--|--|--|--|--|--|--|--|--|--|--|--|--|--|--|--|--|--|--|--|--|--|--|--|--|--|--|--|--|--|--|--|--|--|--|--|--|--|--|--|--|--|--|--|--|--|--|--|--|--|--|--|--|--|--|--|--|--|--|--|--|--|--|--|--|--|--|--|--|--|--|--|--|--|--|--|--|--|--|--|--|--|--|--|--|--|--|--|--|--|--|--|--|--|--|--|--|--|--|--|--|--|--|--|--|--|--|--|--|--|--|--|--|--|--|--|--|--|--|--|--|--|--|--|--|--|--|--|--|--|--|--|--|--|--|--|--|--|--|--|--|--|--|--|--|--|--|--|--|--|--|--|--|--|--|--|--|--|--|--|--|--|--|--|--|--|--|--|--|--|--|--|--|--|--|--|--|--|--|--|--|--|--|--|--|--|--|--|--|--|--|--|--|--|--|--|--|--|--|--|--|--|--|--|--|--|--|--|--|--|--|--|--|--|--|--|--|--|--|--|--|--|--|--|--|--|--|--|--|--|--|--|--|--|--|--|--|--|--|--|--|--|--|--|--|--|--|--|--|--|--|--|--|--|--|--|--|--|--|--|--|--|--|--|--|--|--|--|--|--|--|--|--|--|--|--|--|--|--|--|--|--|--|--|--|--|--|--|--|--|--|--|--|--|--|--|--|--|--|--|--|--|--|--|--|--|--|--|--|--|--|--|--|--|--|--|--|--|--|--|--|--|--|--|--|--|--|--|--|--|--|--|--|--|--|--|--|--|--|--|--|--|--|--|--|--|--|--|--|--|--|--|--|--|--|--|--|--|--|--|--|--|--|--|--|--|--|--|--|--|--|--|--|--|--|--|--|--|--|--|--|--|--|--|--|--|--|--|--|--|--|--|--|--|--|--|--|--|--|--|--|--|--|--|--|--|--|--|--|--|--|--|--|--|--|--|--|--|--|--|--|--|--|--|--|--|--|--|--|--|--|--|--|--|--|--|--|--|--|--|--|--|--|--|--|--|--|--|--|--|--|--|--|--|--|--|--|--|--|--|--|--|--|--|--|--|--|--|--|--|--|--|--|--|--|--|--|--|--|--|--|--|--|--|--|--|--|--|--|--|--|--|--|--|--|--|--|--|--|--|--|--|--|--|--|--|--|--|--|--|--|--|--|--|--|--|--|--|--|--|--|--|--|--|--|--|--|--|--|--|--|--|--|--|--|--|--|--|--|--|--|--|--|--|--|--|--|--|--|--|--|--|--|--|--|--|--|--|--|--|--|--|--|--|--|--|--|--|--|--|--|--|--|--|--|--|--|--|--|--|--|--|--|--|--|--|--|--|--|--|--|--|--|--|--|--|--|--|--|--|--|--|--|--|--|--|--|--|--|--|--|--|--|--|--|--|--|--|--|--|--|--|--|--|--|--|--|--|--|--|--|--|--|--|--|--|--|--|--|--|--|--|--|--|--|--|--|--|--|--|--|--|--|--|--|--|--|--|--|--|--|--|--|--|--|--|--|--|--|--|--|--|--|--|--|--|--|--|--|--|--|--|--|--|--|--|--|--|--|--|--|--|--|--|--|--|--|--|--|--|--|--|--|--|--|--|--|--|--|--|--|--|--|--|--|--|--|--|--|--|--|--|--|--|--|--|--|--|--|--|--|--|--|--|--|--|--|--|--|--|--|--|--|--|--|--|--|--|--|--|--|--|--|--|--|--|--|--|--|--|--|--|--|--|--|--|--|--|--|--|--|--|--|--|--|--|--|--|--|--|--|--|--|--|--|--|--|--|--|--|--|--|--|--|--|--|--|--|--|--|--|--|--|--|--|--|--|--|--|--|--|--|--|--|--|--|--|--|--|--|--|----|
|  |  |  |  |  |  |  |  |  |  |  |  |  |  |  |  |  |  |  |  |  |  |  |  |  |  |  |  |  |  |  |  |  |  |  |  |  |  |  |  |  |  |  |  |  |  |  |  |  |  |  |  |  |  |  |  |  |  |  |  |  |  |  |  |  |  |  |  |  |  |  |  |  |  |  |  |  |  |  |  |  |  |  |  |  |  |  |  |  |  |  |  |  |  |  |  |  |  |  |  |  |  |  |  |  |  |  |  |  |  |  |  |  |  |  |  |  |  |  |  |  |  |  |  |  |  |  |  |  |  |  |  |  |  |  |  |  |  |  |  |  |  |  |  |  |  |  |  |  |  |  |  |  |  |  |  |  |  |  |  |  |  |  |  |  |  |  |  |  |  |  |  |  |  |  |  |  |  |  |  |  |  |  |  |  |  |  |  |  |  |  |  |  |  |  |  |  |  |  |  |  |  |  |  |  |  |  |  |  |  |  |  |  |  |  |  |  |  |  |  |  |  |  |  |  |  |  |  |  |  |  |  |  |  |  |  |  |  |  |  |  |  |  |  |  |  |  |  |  |  |  |  |  |  |  |  |  |  |  |  |  |  |  |  |  |  |  |  |  |  |  |  |  |  |  |  |  |  |  |  |  |  |  |  |  |  |  |  |  |  |  |  |  |  |  |  |  |  |  |  |  |  |  |  |  |  |  |  |  |  |  |  |  |  |  |  |  |  |  |  |  |  |  |  |  |  |  |  |  |  |  |  |  |  |  |  |  |  |  |  |  |  |  |  |  |  |  |  |  |  |  |  |  |  |  |  |  |  |  |  |  |  |  |  |  |  |  |  |  |  |  |  |  |  |  |  |  |  |  |  |  |  |  |  |  |  |  |  |  |  |  |  |  |  |  |  |  |  |  |  |  |  |  |  |  |  |  |  |  |  |  |  |  |  |  |  |  |  |  |  |  |  |  |  |  |  |  |  |  |  |  |  |  |  |  |  |  |  |  |  |  |  |  |  |  |  |  |  |  |  |  |  |  |  |  |  |  |  |  |  |  |  |  |  |  |  |  |  |  |  |  |  |  |  |  |  |  |  |  |  |  |  |  |  |  |  |  |  |  |  |  |  |  |  |  |  |  |  |  |  |  |  |  |  |  |  |  |  |  |  |  |  |  |  |  |  |  |  |  |  |  |  |  |  |  |  |  |  |  |  |  |  |  |  |  |  |  |  |  |  |  |  |  |  |  |  |  |  |  |  |  |  |  |  |  |  |  |  |  |  |  |  |  |  |  |  |  |  |  |  |  |  |  |  |  |  |  |  |  |  |  |  |  |  |  |  |  |  |  |  |  |  |  |  |  |  |  |  |  |  |  |  |  |  |  |  |  |  |  |  |  |  |  |  |  |  |  |  |  |  |  |  |  |  |  |  |  |  |  |  |  |  |  |  |  |  |  |  |  |  |  |  |  |  |  |  |  |  |  |  |  |  |  |  |  |  |  |  |  |  |  |  |  |  |  |  |  |  |  |  |  |  |  |  |  |  |  |  |  |  |  |  |  |  |  |  |  |  |  |  |  |  |  |  |  |  |  |  |  |  |  |  |  |  |  |  |  |  |  |  |  |  |  |  |  |  |  |  |  |  |  |  |  |  |  |  |  |  |  |  |  |  |  |  |  |  |  |  |  |  |  |  |  |  |  |  |  |  |  |  |  |  |  |  |  |  |  |  |  |  |  |  |  |  |  |  |  |  |  |  |  |  |  |  |  |  |  |  |  |  |  |  |  |  |  |  |  |  |  |  |  |  |  |  |  |  |  |  |  |  |  |  |  |  |  |  |  |  |  |  |  |  |  |  |  |  |  |  |  |  |  |  |  |  |  |  |  |  |  |  |  |  |  |  |  |  |  |  |  |  |  |  |  |  |  |  |  |  |  |  |  |  |  |  |  |  |  |  |  |  |  |  |  |  |  |  |  |  |  |  |  |  |  |  |  |  |  |  |  |  |  |  |  |  |  |  |  |  |  |  |  |  |  |  |  |  |  |  |  |  |  |  |  |  |  |  |  |  |  |  |  |  |  |  |  |  |  |  |  |  |  |  |  |  |  |  |  |  |  |  |  |  |  |  |  |  |  |  |  |  |  |  |  |  |  |  |  |  |  |  |  |  |  |  |  |  |  |  |  |  |  |  |  |  |  |  |  |  |  |  |  |  |  |  |  |  |  |  |  |  |  |  |  |  |  |  |  |  |  |  |  |  |  |  |  |  |  |  |  |  |  |  |  |  |  |  |  |  |  |  |  |  |  |  |  |  |  |  |  |  |  |  |  |  |  |  |  |  |  |  |  |  |  |  |  |  |  |  |  |  |  |  |  |  |  |  |  |  |  |  |  |  |  |  |  |  |  |  |  |  |  |  |  |  |  |  |  |  |  |  |  |  |  |  |  |  |  |  |  |  |  |  |  |  |  |  |  |  |  |  |  |  |  |  |  |  |  |  |  |  |  |  |  |  |  |  |  |  |  |  |  |  |  |  |  |  |  |  |  |  |  |  |  |  |  |  |  |  |  |  |  |  |  |  |  |  |  |  |  |  |  |  |  |  |  |  |  |  |  |  |  |  |  |  |  |  |  |  |  |  |  |  |  |  |  |  |  |  |  |  |  |  |  |  |  |  |  |  |  |  |  |  |  |  |  |  |  |  |  |  |  |  |  |  |  |  |  |  |  |  |  |  |  |  |  |  |  |  |  |  |  |  |  |  |  |  |  |  |  |  |  |  |  |  |  |  |  |  |  |  |  |  |  |  |  |  |  |  |  |  |  |  |  |  |  |  |  |  |  |  |  |  |  |  |  |  |  |  |  |  |  |  |  |  |  |  |  |  |  |  |  |  |  |  |  |  |  |  |  |  |  |  |  |  |  |  |  |  |  |  |  |  |  |  |  |  |  |  |  |  |  |  |  |  |  |  |  |  |  |  |  |  |  |  |  |  |  |  |  |  |  |  |  |  |  |  |  |  |  |  |  |  |  |  |  |  |  |  |  |  |  |  |  |  |  |  |  |  |  |  |  |  |  |  |  |  |  |  |  |  |  |  |  |  |  | </ |
|--|--|--|--|--|--|--|--|--|--|--|--|--|--|--|--|--|--|--|--|--|--|--|--|--|--|--|--|--|--|--|--|--|--|--|--|--|--|--|--|--|--|--|--|--|--|--|--|--|--|--|--|--|--|--|--|--|--|--|--|--|--|--|--|--|--|--|--|--|--|--|--|--|--|--|--|--|--|--|--|--|--|--|--|--|--|--|--|--|--|--|--|--|--|--|--|--|--|--|--|--|--|--|--|--|--|--|--|--|--|--|--|--|--|--|--|--|--|--|--|--|--|--|--|--|--|--|--|--|--|--|--|--|--|--|--|--|--|--|--|--|--|--|--|--|--|--|--|--|--|--|--|--|--|--|--|--|--|--|--|--|--|--|--|--|--|--|--|--|--|--|--|--|--|--|--|--|--|--|--|--|--|--|--|--|--|--|--|--|--|--|--|--|--|--|--|--|--|--|--|--|--|--|--|--|--|--|--|--|--|--|--|--|--|--|--|--|--|--|--|--|--|--|--|--|--|--|--|--|--|--|--|--|--|--|--|--|--|--|--|--|--|--|--|--|--|--|--|--|--|--|--|--|--|--|--|--|--|--|--|--|--|--|--|--|--|--|--|--|--|--|--|--|--|--|--|--|--|--|--|--|--|--|--|--|--|--|--|--|--|--|--|--|--|--|--|--|--|--|--|--|--|--|--|--|--|--|--|--|--|--|--|--|--|--|--|--|--|--|--|--|--|--|--|--|--|--|--|--|--|--|--|--|--|--|--|--|--|--|--|--|--|--|--|--|--|--|--|--|--|--|--|--|--|--|--|--|--|--|--|--|--|--|--|--|--|--|--|--|--|--|--|--|--|--|--|--|--|--|--|--|--|--|--|--|--|--|--|--|--|--|--|--|--|--|--|--|--|--|--|--|--|--|--|--|--|--|--|--|--|--|--|--|--|--|--|--|--|--|--|--|--|--|--|--|--|--|--|--|--|--|--|--|--|--|--|--|--|--|--|--|--|--|--|--|--|--|--|--|--|--|--|--|--|--|--|--|--|--|--|--|--|--|--|--|--|--|--|--|--|--|--|--|--|--|--|--|--|--|--|--|--|--|--|--|--|--|--|--|--|--|--|--|--|--|--|--|--|--|--|--|--|--|--|--|--|--|--|--|--|--|--|--|--|--|--|--|--|--|--|--|--|--|--|--|--|--|--|--|--|--|--|--|--|--|--|--|--|--|--|--|--|--|--|--|--|--|--|--|--|--|--|--|--|--|--|--|--|--|--|--|--|--|--|--|--|--|--|--|--|--|--|--|--|--|--|--|--|--|--|--|--|--|--|--|--|--|--|--|--|--|--|--|--|--|--|--|--|--|--|--|--|--|--|--|--|--|--|--|--|--|--|--|--|--|--|--|--|--|--|--|--|--|--|--|--|--|--|--|--|--|--|--|--|--|--|--|--|--|--|--|--|--|--|--|--|--|--|--|--|--|--|--|--|--|--|--|--|--|--|--|--|--|--|--|--|--|--|--|--|--|--|--|--|--|--|--|--|--|--|--|--|--|--|--|--|--|--|--|--|--|--|--|--|--|--|--|--|--|--|--|--|--|--|--|--|--|--|--|--|--|--|--|--|--|--|--|--|--|--|--|--|--|--|--|--|--|--|--|--|--|--|--|--|--|--|--|--|--|--|--|--|--|--|--|--|--|--|--|--|--|--|--|--|--|--|--|--|--|--|--|--|--|--|--|--|--|--|--|--|--|--|--|--|--|--|--|--|--|--|--|--|--|--|--|--|--|--|--|--|--|--|--|--|--|--|--|--|--|--|--|--|--|--|--|--|--|--|--|--|--|--|--|--|--|--|--|--|--|--|--|--|--|--|--|--|--|--|--|--|--|--|--|--|--|--|--|--|--|--|--|--|--|--|--|--|--|--|--|--|--|--|--|--|--|--|--|--|--|--|--|--|--|--|--|--|--|--|--|--|--|--|--|--|--|--|--|--|--|--|--|--|--|--|--|--|--|--|--|--|--|--|--|--|--|--|--|--|--|--|--|--|--|--|--|--|--|--|--|--|--|--|--|--|--|--|--|--|--|--|--|--|--|--|--|--|--|--|--|--|--|--|--|--|--|--|--|--|--|--|--|--|--|--|--|--|--|--|--|--|--|--|--|--|--|--|--|--|--|--|--|--|--|--|--|--|--|--|--|--|--|--|--|--|--|--|--|--|--|--|--|--|--|--|--|--|--|--|--|--|--|--|--|--|--|--|--|--|--|--|--|--|--|--|--|--|--|--|--|--|--|--|--|--|--|--|--|--|--|--|--|--|--|--|--|--|--|--|--|--|--|--|--|--|--|--|--|--|--|--|--|--|--|--|--|--|--|--|--|--|--|--|--|--|--|--|--|--|--|--|--|--|--|--|--|--|--|--|--|--|--|--|--|--|--|--|--|--|--|--|--|--|--|--|--|--|--|--|--|--|--|--|--|--|--|--|--|--|--|--|--|--|--|--|--|--|--|--|--|--|--|--|--|--|--|--|--|--|--|--|--|--|--|--|--|--|--|--|--|--|--|--|--|--|--|--|--|--|--|--|--|--|--|--|--|--|--|--|--|--|--|--|--|--|--|--|--|--|--|--|--|--|--|--|--|--|--|--|--|--|--|--|--|--|--|--|--|--|--|--|--|--|--|--|--|--|--|--|--|--|--|--|--|--|--|--|--|--|--|--|--|--|--|--|--|--|--|--|--|--|--|--|--|--|--|--|--|--|--|--|--|--|--|--|--|--|--|--|--|--|--|--|--|--|--|--|--|--|--|--|--|--|--|--|--|--|--|--|--|--|--|--|--|--|--|--|--|--|--|--|--|--|--|--|--|--|--|--|--|--|--|--|--|--|--|--|--|--|--|--|--|--|--|--|--|--|--|--|--|--|--|--|--|--|--|--|--|--|--|--|--|--|--|--|--|--|--|--|--|--|--|--|--|--|--|--|--|--|--|--|--|--|--|--|--|--|--|--|--|--|--|--|--|--|--|--|--|--|--|--|--|--|--|--|--|--|--|--|--|--|--|--|--|--|--|--|--|--|--|--|--|--|--|--|--|----|

|  |                   |                                      |                 |                                 |                                                                                               |              |     |   |          |       |   |                                                                                                                                                                                                                                                                                                                                                                             |             |                                                                                                                                                                                                                                                                 |
|--|-------------------|--------------------------------------|-----------------|---------------------------------|-----------------------------------------------------------------------------------------------|--------------|-----|---|----------|-------|---|-----------------------------------------------------------------------------------------------------------------------------------------------------------------------------------------------------------------------------------------------------------------------------------------------------------------------------------------------------------------------------|-------------|-----------------------------------------------------------------------------------------------------------------------------------------------------------------------------------------------------------------------------------------------------------------|
|  | Energy Production | electron-transfer proteins           | MMSR116_RS23965 | cytochrome c family protein     | CYC2_BLA VI ame:<br>Full=Cytochrome c2 Flags:<br>Precursor                                    | -1.062926614 | 123 | 5 | 4.58E-27 | 67.2% | 6 | F:metal ion binding; F:electron carrier activity;<br>P:oxidation-reduction process; P:photosynthesis;<br>C:periplasmic space; F:heme binding                                                                                                                                                                                                                                |             | no IPS match                                                                                                                                                                                                                                                    |
|  | Energy Production | <u>NAD(+)</u><br><u>biosynthesis</u> | MMSR116_RS22325 | alkene reductase                | NEMA_ECOLI ame: Full=N-ethylmaleimide reductase ame:<br>Full=N-ethylmaleimide reducing enzyme | 1.10349884   | 364 | 5 | 3.63E-90 | 57.6% | 9 | P:monocarboxylic acid biosynthetic process; F:N-ethylmaleimide reductase activity; F:FMN binding;<br>P:nitroglycerin metabolic process; P:2,4,6-trinitrotoluene catabolic process; F:chromate reductase activity; C:cytosol;<br>F:oxidoreductase activity, acting on other nitrogenous compounds as donors, with NAD or NADP as acceptor;<br>P:fatty acid metabolic process |             | IPRO04147 (PFAM);<br>PTHR43851.SF3 (PANTHER);<br>IPRO34646 (PANTHER);<br>IPRO11009 (SUPERFAMILY)                                                                                                                                                                |
|  | Energy Production | <u>NAD(+)</u><br><u>biosynthesis</u> | MMSR116_RS13000 | aldo/keto reductase             | Y2408_MYCS2 ame:<br>Full=Uncharacterized oxidoreductase MSMEG_2408 MSMEI_2347                 | 1.256531541  | 276 | 5 | 9.93E-99 | 67.6% | 2 | F:oxidoreductase activity;<br>P:oxidation-reduction process                                                                                                                                                                                                                                                                                                                 |             | IPRO36909 (G3DSA:1.10.76.0.GENE3D);<br>IPRO09056 (PFAM);<br>IPRO30991 (TIGRFAM);<br>PTHR37823 (PANTHER);<br>PTHR37823.SF1 (PANTHER);<br>IPRO09056 (PROSITE_PROFI LES);<br>IPRO36909 (SUPERFAMILY)                                                               |
|  | Energy Production | <u>NAD(+)</u><br><u>biosynthesis</u> | MMSR116_RS20305 | KR domain-containing protein    | YXNA_BACSU ame:<br>Full=Uncharacterized oxidoreductase                                        | 1.241503923  | 337 | 5 | 5.69E-26 | 45.4% | 7 | P:cellular ketone metabolic process; F:oxidoreductase activity, acting on the CH-OH group of donors, NAD or NADP as acceptor; C:intracellular membrane-bounded organelle;<br>C:membrane; C:cytoplasmic part; P:ammonium ion metabolic process; P:sphingolipid metabolic process                                                                                             |             | no IPS match                                                                                                                                                                                                                                                    |
|  | Energy Production | <u>NAD(+)</u><br><u>biosynthesis</u> | MMSR116_RS30315 | KR domain-containing protein    | YVAG_BACSU ame:<br>Full=Uncharacterized oxidoreductase                                        | 1.015049458  | 265 | 5 | 7.04E-81 | 54.6% | 2 | F:oxidoreductase activity, acting on the CH-OH group of donors, NAD or NADP as acceptor;<br>P:single-organism metabolic process                                                                                                                                                                                                                                             |             | G3DSA:3.40.630.10 (GENE3D);<br>IPRO17439 (TIGRFAM);<br>IPRO11650 (PFAM);<br>IPRO17439 (PIRSF);<br>G3DSA:3.30.70.360 (GENE3D);<br>IPRO02933 (PFAM);<br>PTHR11014.SF1 41 (PANTHER);<br>PTHR11014 (PANTHER);<br>IPRO36264 (SUPERFAMILY);<br>SSF53187 (SUPERFAMILY) |
|  | Energy Production | <u>NAD(+)</u><br><u>biosynthesis</u> | MMSR116_RS27740 | flavin reductase family protein | YDFE_BACSURecName:<br>Full=Uncharacterized protein Ydfe                                       | 1.58749893   | 249 | 2 | 4.76E-45 | 53.5% | 4 | F:oxidoreductase activity, acting on the CH-NH group of donors, NAD or NADP as acceptor;<br>F:FMN binding; F:oxidoreductase activity;<br>P:oxidation-reduction process                                                                                                                                                                                                      |             | PRO1036 (PRINTS);<br>IPRO11701 (PFAM);<br>G3DSA:1.20.172.0.10 (GENE3D);<br>G3DSA:1.20.125.0.20 (GENE3D);<br>PTHR23501 (PANTHER);<br>PTHR23501.SF1 06 (PANTHER);<br>IPRO20846 (PROSITE_PROFI LES);<br>IPRO36259 (SUPERFAMILY)                                    |
|  | Energy Production | <u>NAD(+)</u><br><u>biosynthesis</u> | MMSR116_RS08300 | flavin reductase family protein | P152_METTH ame: Full=MTH_152                                                                  | 1.119533127  | 230 | 5 | 1.26E-46 | 46.6% | 4 | F:oxidoreductase activity, acting on the CH-NH group of donors, NAD or NADP as acceptor;<br>F:FMN binding; F:oxidoreductase activity;<br>P:oxidation-reduction process                                                                                                                                                                                                      | EC:3.3.2.10 | IPRO00639 (PRINTS);<br>IPRO00073 (PRINTS);<br>IPRO00073 (PFAM);<br>IPRO29058 (G3DSA:3.40.50.GENE3D);                                                                                                                                                            |



|  |                   |                                                            |                 |                                            |                                                                                                                                                 |              |     |   |           |       |    |                                                                                                                                                                                                                                                                                                                                                                                                                                                                                      |  |                                                                                                                                                                      |
|--|-------------------|------------------------------------------------------------|-----------------|--------------------------------------------|-------------------------------------------------------------------------------------------------------------------------------------------------|--------------|-----|---|-----------|-------|----|--------------------------------------------------------------------------------------------------------------------------------------------------------------------------------------------------------------------------------------------------------------------------------------------------------------------------------------------------------------------------------------------------------------------------------------------------------------------------------------|--|----------------------------------------------------------------------------------------------------------------------------------------------------------------------|
|  | Energy Production | FAD                                                        | MMSR116_RS05110 | FAD-binding oxidoreductase                 | GLCD_ECOL6 ame: Full=Glycolate oxidase subunit                                                                                                  | 1.399373638  | 477 | 5 | 1.24E-124 | 53.6% | 5  | P:glycolate catabolic process; C:membrane; F:glycolate dehydrogenase activity; C:cytoplasmic part; P:cellular response to DNA damage stimulus                                                                                                                                                                                                                                                                                                                                        |  | no IPS match                                                                                                                                                         |
|  | Energy Production | NADP                                                       | MMSR116_RS08270 | aldo/keto reductase                        | YRPG_BACSU ame: Full=Uncharacterized oxidoreductase                                                                                             | -2.345369915 | 329 | 5 | 1.12E-128 | 54.4% | 4  | C:cytoplasm; C:membrane; P:single-organism metabolic process; P:organic substance metabolic process                                                                                                                                                                                                                                                                                                                                                                                  |  | IPR003593 (SMART); G3DSA:3.40.50.300 (GENE3D); IPR003439 (PFAM); PTHR42794 (PANTHER); IPR003439 (PROSITE_PROFILES); IPR027417 (SUPERFAMILY)                          |
|  | Energy Production | NADP/FAD                                                   | MMSR116_RS02450 | dehydrogenase                              | FDHA_DESGI ame: Full=Formate dehydrogenase subunit alpha Short=FDH subunit alpha ame: Full=Formate dehydrogenase large subunit Flags: Precursor | 1.302504318  | 197 | 5 | 2.99E-33  | 57.8% | 15 | F:formate dehydrogenase (quinone) activity; P:anaerobic respiration; F:selenium binding; F:electron carrier activity; F:molybdenum ion binding; P:cellular response to DNA damage stimulus; C:formate dehydrogenase complex; P:molybdenum incorporation into iron-sulfur cluster; F:protein binding; C:membrane; F:formate dehydrogenase (cytochrome-c-553) activity; C:cytosol; C:outer membrane-bounded periplasmic space; F:4 iron, 4 sulfur cluster binding; P:formate oxidation |  | IPR018677 (PFAM)                                                                                                                                                     |
|  | Energy Production | <u>NAD(+)</u> biosynthesis                                 | MMSR116_RS12995 | quinolinate synthase NadA                  | NADA2_RHILO ame: Full=Quinolinate synthase A 2                                                                                                  | 2.077021219  | 338 | 5 | 6.78E-172 | 84.6% | 7  | P:quinolinate biosynthetic process; C:cytoplasm; F:metal ion binding; P:NAD biosynthetic process; F:4 iron, 4 sulfur cluster binding; F:quinolinate synthetase A activity; F:transferase activity, transferring alkyl or aryl (other than methyl) groups                                                                                                                                                                                                                             |  | IPR001296 (PFAM); G3DSA:3.40.50.2000 (GENE3D); G3DSA:3.40.50.2000 (GENE3D); IPR028098 (PFAM); PTHR12526 (PANTHER); PTHR12526:SF554 (PANTHER); SSF53756 (SUPERFAMILY) |
|  | Energy Production | <u>NAD(+)</u> biosynthesis                                 | MMSR116_RS19090 | NADH dehydrogenase                         | NUON_DESAP ame: Full=NADH-quinone oxidoreductase subunit N ame: Full=NADH dehydrogenase I subunit N ame: Full=NDH-1 subunit N                   | -1.187346084 | 584 | 5 | 1.35E-22  | 49.4% | 1  | P:transport                                                                                                                                                                                                                                                                                                                                                                                                                                                                          |  | IPR036526 (G3DSA:3.60.11.0.GENE3D); IPR003010 (PFAM); PTHR23088 (PANTHER); PTHR23088:SF27 (PANTHER); IPR003010 (PROSITE_PROFILES); IPR036526 (SUPERFAMILY)           |
|  | Energy Production | Luciferase                                                 | MMSR116_RS22605 | LLM class flavin-dependent oxidoreductase  | YHBW_ECOL6 ame: Full=Luciferase-like monooxygenase                                                                                              | 1.827202051  | 342 | 5 | 4.16E-79  | 55.8% | 1  | C:cytosol                                                                                                                                                                                                                                                                                                                                                                                                                                                                            |  | G3DSA:3.40.50.1980 (GENE3D); G3DSA:3.40.50.1980 (GENE3D); IPR002491 (PFAM); PTHR30535 (PANTHER); IPR002491 (PROSITE_PROFILES); SSF53807 (SUPERFAMILY)                |
|  | Energy Production | Regulation of macromolecule metabolic process - Luciferase | MMSR116_RS04130 | SMP-30/gluconolactonase/LRE family protein | GALAB_RHIME ame: Full= sugar lactone lactonase                                                                                                  | 2.244206328  | 296 | 5 | 5.18E-88  | 48.8% | 8  | P:positive regulation of hydrolase activity; P:regulation of macromolecule metabolic process; F:metal ion binding; C:intracellular part; P:single-organism process; P:positive regulation of biological process; P:regulation of primary metabolic process; P:negative regulation of cellular metabolic process                                                                                                                                                                      |  | IPR025668 (PFAM); IPR008490 (PFAM); PTHR33408:SF2 (PANTHER); PTHR33408 (PANTHER)                                                                                     |
|  | Energy Production |                                                            | MMSR116_RS06605 | GNAT family N-acetyltransferase            | ---NA---                                                                                                                                        | 1.515096631  | 197 |   |           |       |    |                                                                                                                                                                                                                                                                                                                                                                                                                                                                                      |  | IPR001155 (PFAM); IPR013785                                                                                                                                          |





|  |                      |                                   |                 |                                                     |                                                                                       |             |     |   |           |       |    |                                                                                                                                                                                                                                                                                                                                                                                                                                                                          |  |                                   |                                                                                                                                                                                                                                                                                                                                                                                                                                                                                             |
|--|----------------------|-----------------------------------|-----------------|-----------------------------------------------------|---------------------------------------------------------------------------------------|-------------|-----|---|-----------|-------|----|--------------------------------------------------------------------------------------------------------------------------------------------------------------------------------------------------------------------------------------------------------------------------------------------------------------------------------------------------------------------------------------------------------------------------------------------------------------------------|--|-----------------------------------|---------------------------------------------------------------------------------------------------------------------------------------------------------------------------------------------------------------------------------------------------------------------------------------------------------------------------------------------------------------------------------------------------------------------------------------------------------------------------------------------|
|  |                      |                                   |                 |                                                     |                                                                                       |             |     |   |           |       |    |                                                                                                                                                                                                                                                                                                                                                                                                                                                                          |  |                                   | (PANTHER);<br>IPRO06311<br>(PROSITE_PROFI<br>LES); SSF53850<br>(SUPERFAMILY)                                                                                                                                                                                                                                                                                                                                                                                                                |
|  | Energy<br>Production | Glycerophospholipid<br>metabolism | MMSR116_R528550 | glycerophosphoryl diester<br>phosphodiesterase      | A4177_ARTBC ame:<br>Full=Extracellular ARB_04177                                      | 1.251883106 | 408 | 5 | 5.02E-87  | 46.4% | 14 | P:glycerol metabolic process; C:cell outer membrane;<br>C:periplasmic space; C:extracellular region;<br>F:glycerophosphodiester phosphodiesterase activity;<br>C:vacuole; C:plasma membrane; F:metal ion binding;<br>F:calcium ion binding; C:cell wall; P:lipid metabolic process;<br>C:membrane; F:phosphoric diester hydrolase activity;<br>F:hydrolase activity                                                                                                      |  |                                   | IPRO10827<br>(PFAM);<br>G3DSA:3.10.20.<br>310 (GENE3D);<br>IPRO23707<br>(PIRSF);<br>G3DSA:2.40.160.<br>.50 (GENE3D);<br>G3DSA:2.40.160.<br>.50 (GENE3D);<br>G3DSA:3.10.20.<br>310 (GENE3D);<br>IPRO23707<br>(TIGRFAM);<br>G3DSA:3.10.20.<br>310 (GENE3D);<br>IPRO00184<br>(PFAM);<br>G3DSA:3.10.20.<br>310 (GENE3D);<br>G3DSA:3.10.20.<br>310 (GENE3D);<br>IPRO23707<br>(PTHR12815:PAN<br>THER);<br>PTHR12815<br>(PANTHER);<br>IPRO23707<br>(HAMAP);<br>IPRO34746<br>(PROSITE_PROFI<br>LES) |
|  | Energy<br>Production | fatty acid<br>biosynthesis        | MMSR116_R506645 | beta-ketoacyl-[acyl-carrier-<br>protein] synthase I | FABP_PSEAB ame: Full=3-oxoacyl-[acyl-carrier-]<br>synthase 1 ame: Full=3-oxoacyl-     | 0.9220399   | 408 | 5 | 2.78E-165 | 71.6% | 3  | F:3-oxoacyl-[acyl-carrier-<br>protein] synthase activity;<br>C:cytosol; P:fatty acid<br>biosynthetic process                                                                                                                                                                                                                                                                                                                                                             |  | EC:6.2<br>.1.5;<br>EC:6.2<br>.1.4 | PRO1798<br>(PRINTS);<br>IPRO03781<br>(SMART);<br>IPRO05811<br>(PFAM);<br>G3DSA:3.40.50.<br>720 (GENE3D);<br>IPRO16102<br>(G3DSA:3.40.50.<br>GENE3D);<br>IPRO05810<br>(PIRSF);<br>IPRO03781<br>(PFAM);<br>IPRO05810<br>(TIGRFAM);<br>PTHR11117:SF2<br>(PANTHER);<br>PTHR11117<br>(PANTHER);<br>IPRO05810<br>(HAMAP);<br>IPRO16102<br>(SUPERFAMILY);<br>IPRO36291<br>(SUPERFAMILY)                                                                                                            |
|  | Energy<br>Production | fatty acid                        | MMSR116_R503285 | acyl-CoA dehydrogenase                              | GCDH_CAEEL ame:<br>Full=Probable glutaryl-mitochondrial Short=GCD Flags:<br>Precursor | 0.958418912 | 409 | 5 | 2.53E-179 | 78%   | 12 | P:fatty-acyl-CoA biosynthetic process; P:fatty acid beta-oxidation using acyl-CoA dehydrogenase; C:mitochondrial matrix; F:fatty-acyl-CoA binding; F:flavin adenine dinucleotide binding; F:electron carrier activity; F:oxidoreductase activity, acting on the CH-CH group of donors, with a flavin as acceptor; P:lipid homeostasis; F:glutaryl-CoA dehydrogenase activity; P:tryptophan metabolic process; C:mitochondrial inner membrane; P:lysine catabolic process |  |                                   | IPRO01650<br>(SMART);<br>IPRO14001<br>(SMART);<br>G3DSA:3.40.50.<br>300 (GENE3D);<br>G3DSA:3.40.50.<br>300 (GENE3D);<br>IPRO01650<br>(PFAM);<br>IPRO05580<br>(PFAM);                                                                                                                                                                                                                                                                                                                        |

|  |  |  |  |  |  |  |  |  |  |  |  |  |  |  |  |  |  |  |  |  |  |  |  |  |  |  |  |  |  |  |  |  |  |  |  |  |  |  |  |  |  |  |  |  |  |  |  |  |  |  |  |  |  |  |  |  |  |  |  |  |  |  |  |  |  |  |  |  |  |  |  |  |  |  |  |  |  |  |  |  |  |  |  |  |  |  |  |  |  |  |  |  |  |  |  |  |  |  |  |  |  |  |  |  |  |  |  |  |  |  |  |  |  |  |  |  |  |  |  |  |  |  |  |  |  |  |  |  |  |  |  |  |  |  |  |  |  |  |  |  |  |  |  |  |  |  |  |  |  |  |  |  |  |  |  |  |  |  |  |  |  |  |  |  |  |  |  |  |  |  |  |  |  |  |  |  |  |  |  |  |  |  |  |  |  |  |  |  |  |  |  |  |  |  |  |  |  |  |  |  |  |  |  |  |  |  |  |  |  |  |  |  |  |  |  |  |  |  |  |  |  |  |  |  |  |  |  |  |  |  |  |  |  |  |  |  |  |  |  |  |  |  |  |  |  |  |  |  |  |  |  |  |  |  |  |  |  |  |  |  |  |  |  |  |  |  |  |  |  |  |  |  |  |  |  |  |  |  |  |  |  |  |  |  |  |  |  |  |  |  |  |  |  |  |  |  |  |  |  |  |  |  |  |  |  |  |  |  |  |  |  |  |  |  |  |  |  |  |  |  |  |  |  |  |  |  |  |  |  |  |  |  |  |  |  |  |  |  |  |  |  |  |  |  |  |  |  |  |  |  |  |  |  |  |  |  |  |  |  |  |  |  |  |  |  |  |  |  |  |  |  |  |  |  |  |  |  |  |  |  |  |  |  |  |  |  |  |  |  |  |  |  |  |  |  |  |  |  |  |  |  |  |  |  |  |  |  |  |  |  |  |  |  |  |  |  |  |  |  |  |  |  |  |  |  |  |  |  |  |  |  |  |  |  |  |  |  |  |  |  |  |  |  |  |  |  |  |  |  |  |  |  |  |  |  |  |  |  |  |  |  |  |  |  |  |  |  |  |  |  |  |  |  |  |  |  |  |  |  |  |  |  |  |  |  |  |  |  |  |  |  |  |  |  |  |  |  |  |  |  |  |  |  |  |  |  |  |  |  |  |  |  |  |  |  |  |  |  |  |  |  |  |  |  |  |  |  |  |  |  |  |  |  |  |  |  |  |  |  |  |  |  |  |  |  |  |  |  |  |  |  |  |  |  |  |  |  |  |  |  |  |  |  |  |  |  |  |  |  |  |  |  |  |  |  |  |  |  |  |  |  |  |  |  |  |  |  |  |  |  |  |  |  |  |  |  |  |  |  |  |  |  |  |  |  |  |  |  |  |  |  |  |  |  |  |  |  |  |  |  |  |  |  |  |  |  |  |  |  |  |  |  |  |  |  |  |  |  |  |  |  |  |  |  |  |  |  |  |  |  |  |  |  |  |  |  |  |  |  |  |  |  |  |  |  |  |  |  |  |  |  |  |  |  |  |  |  |  |  |  |  |  |  |  |  |  |  |  |  |  |  |  |  |  |  |  |  |  |  |  |  |  |  |  |  |  |  |  |  |  |  |  |  |  |  |  |  |  |  |  |  |  |  |  |  |  |  |  |  |  |  |  |  |  |  |  |  |  |  |  |  |  |  |  |  |  |  |  |  |  |  |  |  |  |  |  |  |  |  |  |  |  |  |  |  |  |  |  |  |  |  |  |  |  |  |  |  |  |  |  |  |  |  |  |  |  |  |  |  |  |  |  |  |  |  |  |  |  |  |  |  |  |  |  |  |  |  |  |  |  |  |  |  |  |  |  |  |  |  |  |  |  |  |  |  |  |  |  |  |  |  |  |  |  |  |  |  |  |  |  |  |  |  |  |  |  |  |  |  |  |  |  |  |  |  |  |  |  |  |  |  |  |  |  |  |  |  |  |  |  |  |  |  |  |  |  |  |  |  |  |  |  |  |  |  |  |  |  |  |  |  |  |  |  |  |  |  |  |  |  |  |  |  |  |  |  |  |  |  |  |  |  |  |  |  |  |  |  |  |  |  |  |  |  |  |  |  |  |  |  |  |  |  |  |  |  |  |  |  |  |  |  |  |  |  |  |  |  |  |  |  |  |  |  |  |  |  |  |  |  |  |  |  |  |  |  |  |  |  |  |  |  |  |  |  |  |  |  |  |  |  |  |  |  |  |  |  |  |  |  |  |  |  |  |  |  |  |  |  |  |  |  |  |  |  |  |  |  |  |  |  |  |  |  |  |  |  |  |  |  |  |  |  |  |  |  |  |  |  |  |  |  |  |  |  |  |  |  |  |  |  |  |  |  |  |  |  |  |  |  |  |  |  |  |  |  |  |  |  |  |  |  |  |  |  |  |  |  |  |  |  |  |  |  |  |  |  |  |  |  |  |  |  |  |  |  |  |  |  |  |  |  |  |  |  |  |  |  |  |  |  |  |  |  |  |  |  |  |  |  |  |  |  |  |  |  |  |  |  |  |  |  |  |  |  |  |  |  |  |  |  |  |  |  |  |  |  |  |  |  |  |  |  |  |  |  |  |  |  |  |  |  |  |  |  |  |  |  |  |  |  |  |  |  |  |  |  |  |  |  |  |  |  |  |  |  |  |  |  |  |  |  |  |  |  |  |  |  |  |  |  |  |  |  |  |  |  |  |  |  |  |  |  |  |  |  |  |  |  |  |  |  |  |  |  |  |  |  |  |  |  |  |  |  |  |  |  |  |  |  |  |  |  |  |  |  |  |  |  |  |  |  |  |  |  |  |  |  |  |  |  |  |  |  |  |  |  |  |  |  |  |  |  |  |  |  |  |  |  |  |  |  |  |  |  |  |  |  |  |  |  |  |  |  |  |  |  |  |  |  |  |  |  |  |  |  |  |  |  |  |  |  |  |  |  |  |  |  |  |  |  |  |  |  |  |  |  |  |  |  |  |  |  |  |  |  |  |  |  |  |  |  |  |  |  |  |  |  |  |  |  |  |  |  |  |  |  |  |  |  |  |  |  |  |  |  |  |  |  |  |  |  |  |  |  |  |
|--|--|--|--|--|--|--|--|--|--|--|--|--|--|--|--|--|--|--|--|--|--|--|--|--|--|--|--|--|--|--|--|--|--|--|--|--|--|--|--|--|--|--|--|--|--|--|--|--|--|--|--|--|--|--|--|--|--|--|--|--|--|--|--|--|--|--|--|--|--|--|--|--|--|--|--|--|--|--|--|--|--|--|--|--|--|--|--|--|--|--|--|--|--|--|--|--|--|--|--|--|--|--|--|--|--|--|--|--|--|--|--|--|--|--|--|--|--|--|--|--|--|--|--|--|--|--|--|--|--|--|--|--|--|--|--|--|--|--|--|--|--|--|--|--|--|--|--|--|--|--|--|--|--|--|--|--|--|--|--|--|--|--|--|--|--|--|--|--|--|--|--|--|--|--|--|--|--|--|--|--|--|--|--|--|--|--|--|--|--|--|--|--|--|--|--|--|--|--|--|--|--|--|--|--|--|--|--|--|--|--|--|--|--|--|--|--|--|--|--|--|--|--|--|--|--|--|--|--|--|--|--|--|--|--|--|--|--|--|--|--|--|--|--|--|--|--|--|--|--|--|--|--|--|--|--|--|--|--|--|--|--|--|--|--|--|--|--|--|--|--|--|--|--|--|--|--|--|--|--|--|--|--|--|--|--|--|--|--|--|--|--|--|--|--|--|--|--|--|--|--|--|--|--|--|--|--|--|--|--|--|--|--|--|--|--|--|--|--|--|--|--|--|--|--|--|--|--|--|--|--|--|--|--|--|--|--|--|--|--|--|--|--|--|--|--|--|--|--|--|--|--|--|--|--|--|--|--|--|--|--|--|--|--|--|--|--|--|--|--|--|--|--|--|--|--|--|--|--|--|--|--|--|--|--|--|--|--|--|--|--|--|--|--|--|--|--|--|--|--|--|--|--|--|--|--|--|--|--|--|--|--|--|--|--|--|--|--|--|--|--|--|--|--|--|--|--|--|--|--|--|--|--|--|--|--|--|--|--|--|--|--|--|--|--|--|--|--|--|--|--|--|--|--|--|--|--|--|--|--|--|--|--|--|--|--|--|--|--|--|--|--|--|--|--|--|--|--|--|--|--|--|--|--|--|--|--|--|--|--|--|--|--|--|--|--|--|--|--|--|--|--|--|--|--|--|--|--|--|--|--|--|--|--|--|--|--|--|--|--|--|--|--|--|--|--|--|--|--|--|--|--|--|--|--|--|--|--|--|--|--|--|--|--|--|--|--|--|--|--|--|--|--|--|--|--|--|--|--|--|--|--|--|--|--|--|--|--|--|--|--|--|--|--|--|--|--|--|--|--|--|--|--|--|--|--|--|--|--|--|--|--|--|--|--|--|--|--|--|--|--|--|--|--|--|--|--|--|--|--|--|--|--|--|--|--|--|--|--|--|--|--|--|--|--|--|--|--|--|--|--|--|--|--|--|--|--|--|--|--|--|--|--|--|--|--|--|--|--|--|--|--|--|--|--|--|--|--|--|--|--|--|--|--|--|--|--|--|--|--|--|--|--|--|--|--|--|--|--|--|--|--|--|--|--|--|--|--|--|--|--|--|--|--|--|--|--|--|--|--|--|--|--|--|--|--|--|--|--|--|--|--|--|--|--|--|--|--|--|--|--|--|--|--|--|--|--|--|--|--|--|--|--|--|--|--|--|--|--|--|--|--|--|--|--|--|--|--|--|--|--|--|--|--|--|--|--|--|--|--|--|--|--|--|--|--|--|--|--|--|--|--|--|--|--|--|--|--|--|--|--|--|--|--|--|--|--|--|--|--|--|--|--|--|--|--|--|--|--|--|--|--|--|--|--|--|--|--|--|--|--|--|--|--|--|--|--|--|--|--|--|--|--|--|--|--|--|--|--|--|--|--|--|--|--|--|--|--|--|--|--|--|--|--|--|--|--|--|--|--|--|--|--|--|--|--|--|--|--|--|--|--|--|--|--|--|--|--|--|--|--|--|--|--|--|--|--|--|--|--|--|--|--|--|--|--|--|--|--|--|--|--|--|--|--|--|--|--|--|--|--|--|--|--|--|--|--|--|--|--|--|--|--|--|--|--|--|--|--|--|--|--|--|--|--|--|--|--|--|--|--|--|--|--|--|--|--|--|--|--|--|--|--|--|--|--|--|--|--|--|--|--|--|--|--|--|--|--|--|--|--|--|--|--|--|--|--|--|--|--|--|--|--|--|--|--|--|--|--|--|--|--|--|--|--|--|--|--|--|--|--|--|--|--|--|--|--|--|--|--|--|--|--|--|--|--|--|--|--|--|--|--|--|--|--|--|--|--|--|--|--|--|--|--|--|--|--|--|--|--|--|--|--|--|--|--|--|--|--|--|--|--|--|--|--|--|--|--|--|--|--|--|--|--|--|--|--|--|--|--|--|--|--|--|--|--|--|--|--|--|--|--|--|--|--|--|--|--|--|--|--|--|--|--|--|--|--|--|--|--|--|--|--|--|--|--|--|--|--|--|--|--|--|--|--|--|--|--|--|--|--|--|--|--|--|--|--|--|--|--|--|--|--|--|--|--|--|--|--|--|--|--|--|--|--|--|--|--|--|--|--|--|--|--|--|--|--|--|--|--|--|--|--|--|--|--|--|--|--|--|--|--|--|--|--|--|--|--|--|--|--|--|--|--|--|--|--|--|--|--|--|--|--|--|--|--|--|--|--|--|--|--|--|--|--|--|--|--|--|--|--|--|--|--|--|--|--|--|--|--|--|--|--|--|--|--|--|--|--|--|--|--|--|--|--|--|--|--|--|--|--|--|--|--|--|--|--|--|--|--|--|--|--|--|--|--|--|--|--|--|--|--|--|--|--|--|--|--|--|--|--|--|--|--|--|--|--|--|--|--|--|--|--|--|--|--|--|--|--|--|--|--|--|--|--|--|--|--|--|--|--|--|--|--|--|--|--|--|--|--|--|--|--|--|--|--|--|--|--|--|--|--|--|--|--|--|--|--|--|--|--|--|--|--|--|--|--|--|--|--|--|--|--|--|--|--|--|--|--|--|--|--|--|--|--|--|--|--|--|--|--|--|--|--|--|--|--|--|--|--|--|--|--|--|--|--|--|
|  |  |  |  |  |  |  |  |  |  |  |  |  |  |  |  |  |  |  |  |  |  |  |  |  |  |  |  |  |  |  |  |  |  |  |  |  |  |  |  |  |  |  |  |  |  |  |  |  |  |  |  |  |  |  |  |  |  |  |  |  |  |  |  |  |  |  |  |  |  |  |  |  |  |  |  |  |  |  |  |  |  |  |  |  |  |  |  |  |  |  |  |  |  |  |  |  |  |  |  |  |  |  |  |  |  |  |  |  |  |  |  |  |  |  |  |  |  |  |  |  |  |  |  |  |  |  |  |  |  |  |  |  |  |  |  |  |  |  |  |  |  |  |  |  |  |  |  |  |  |  |  |  |  |  |  |  |  |  |  |  |  |  |  |  |  |  |  |  |  |  |  |  |  |  |  |  |  |  |  |  |  |  |  |  |  |  |  |  |  |  |  |  |  |  |  |  |  |  |  |  |  |  |  |  |  |  |  |  |  |  |  |  |  |  |  |  |  |  |  |  |  |  |  |  |  |  |  |  |  |  |  |  |  |  |  |  |  |  |  |  |  |  |  |  |  |  |  |  |  |  |  |  |  |  |  |  |  |  |  |  |  |  |  |  |  |  |  |  |  |  |  |  |  |  |  |  |  |  |  |  |  |  |  |  |  |  |  |  |  |  |  |  |  |  |  |  |  |  |  |  |  |  |  |  |  |  |  |  |  |  |  |  |  |  |  |  |  |  |  |  |  |  |  |  |  |  |  |  |  |  |  |  |  |  |  |  |  |  |  |  |  |  |  |  |  |  |  |  |  |  |  |  |  |  |  |  |  |  |  |  |  |  |  |  |  |  |  |  |  |  |  |  |  |  |  |  |  |  |  |  |  |  |  |  |  |  |  |  |  |  |  |  |  |  |  |  |  |  |  |  |  |  |  |  |  |  |  |  |  |  |  |  |  |  |  |  |  |  |  |  |  |  |  |  |  |  |  |  |  |  |  |  |  |  |  |  |  |  |  |  |  |  |  |  |  |  |  |  |  |  |  |  |  |  |  |  |  |  |  |  |  |  |  |  |  |  |  |  |  |  |  |  |  |  |  |  |  |  |  |  |  |  |  |  |  |  |  |  |  |  |  |  |  |  |  |  |  |  |  |  |  |  |  |  |  |  |  |  |  |  |  |  |  |  |  |  |  |  |  |  |  |  |  |  |  |  |  |  |  |  |  |  |  |  |  |  |  |  |  |  |  |  |  |  |  |  |  |  |  |  |  |  |  |  |  |  |  |  |  |  |  |  |  |  |  |  |  |  |  |  |  |  |  |  |  |  |  |  |  |  |  |  |  |  |  |  |  |  |  |  |  |  |  |  |  |  |  |  |  |  |  |  |  |  |  |  |  |  |  |  |  |  |  |  |  |  |  |  |  |  |  |  |  |  |  |  |  |  |  |  |  |  |  |  |  |  |  |  |  |  |  |  |  |  |  |  |  |  |  |  |  |  |  |  |  |  |  |  |  |  |  |  |  |  |  |  |  |  |  |  |  |  |  |  |  |  |  |  |  |  |  |  |  |  |  |  |  |  |  |  |  |  |  |  |  |  |  |  |  |  |  |  |  |  |  |  |  |  |  |  |  |  |  |  |  |  |  |  |  |  |  |  |  |  |  |  |  |  |  |  |  |  |  |  |  |  |  |  |  |  |  |  |  |  |  |  |  |  |  |  |  |  |  |  |  |  |  |  |  |  |  |  |  |  |  |  |  |  |  |  |  |  |  |  |  |  |  |  |  |  |  |  |  |  |  |  |  |  |  |  |  |  |  |  |  |  |  |  |  |  |  |  |  |  |  |  |  |  |  |  |  |  |  |  |  |  |  |  |  |  |  |  |  |  |  |  |  |  |  |  |  |  |  |  |  |  |  |  |  |  |  |  |  |  |  |  |  |  |  |  |  |  |  |  |  |  |  |  |  |  |  |  |  |  |  |  |  |  |  |  |  |  |  |  |  |  |  |  |  |  |  |  |  |  |  |  |  |  |  |  |  |  |  |  |  |  |  |  |  |  |  |  |  |  |  |  |  |  |  |  |  |  |  |  |  |  |  |  |  |  |  |  |  |  |  |  |  |  |  |  |  |  |  |  |  |  |  |  |  |  |  |  |  |  |  |  |  |  |  |  |  |  |  |  |  |  |  |  |  |  |  |  |  |  |  |  |  |  |  |  |  |  |  |  |  |  |  |  |  |  |  |  |  |  |  |  |  |  |  |  |  |  |  |  |  |  |  |  |  |  |  |  |  |  |  |  |  |  |  |  |  |  |  |  |  |  |  |  |  |  |  |  |  |  |  |  |  |  |  |  |  |  |  |  |  |  |  |  |  |  |  |  |  |  |  |  |  |  |  |  |  |  |  |  |  |  |  |  |  |  |  |  |  |  |  |  |  |  |  |  |  |  |  |  |  |  |  |  |  |  |  |  |  |  |  |  |  |  |  |  |  |  |  |  |  |  |  |  |  |  |  |  |  |  |  |  |  |  |  |  |  |  |  |  |  |  |  |  |  |  |  |  |  |  |  |  |  |  |  |  |  |  |  |  |  |  |  |  |  |  |  |  |  |  |  |  |  |  |  |  |  |  |  |  |  |  |  |  |  |  |  |  |  |  |  |  |  |  |  |  |  |  |  |  |  |  |  |  |  |  |  |  |  |  |  |  |  |  |  |  |  |  |  |  |  |  |  |  |  |  |  |  |  |  |  |  |  |  |  |  |  |  |  |  |  |  |  |  |  |  |  |  |  |  |  |  |  |  |  |  |  |  |  |  |  |  |  |  |  |  |  |  |  |  |  |  |  |  |  |  |  |  |  |  |  |  |  |  |  |  |  |  |  |  |  |  |  |  |  |  |  |  |  |  |  |  |  |  |  |  |  |  |  |  |  |  |  |  |  |  |  |  |  |  |  |  |  |  |  |  |  |  |  |  |  |  |  |  |  |  |  |  |  |  |  |  |  |  |  |  |  |  |  |  |  |  |  |  |  |  |  |  |  |  |  |  |  |  |  |  |  |  |  |  |  |  |  |  |  |  |  |  |  |  |  |  |  |  |  |  |  |  |  |  |  |  |
|--|--|--|--|--|--|--|--|--|--|--|--|--|--|--|--|--|--|--|--|--|--|--|--|--|--|--|--|--|--|--|--|--|--|--|--|--|--|--|--|--|--|--|--|--|--|--|--|--|--|--|--|--|--|--|--|--|--|--|--|--|--|--|--|--|--|--|--|--|--|--|--|--|--|--|--|--|--|--|--|--|--|--|--|--|--|--|--|--|--|--|--|--|--|--|--|--|--|--|--|--|--|--|--|--|--|--|--|--|--|--|--|--|--|--|--|--|--|--|--|--|--|--|--|--|--|--|--|--|--|--|--|--|--|--|--|--|--|--|--|--|--|--|--|--|--|--|--|--|--|--|--|--|--|--|--|--|--|--|--|--|--|--|--|--|--|--|--|--|--|--|--|--|--|--|--|--|--|--|--|--|--|--|--|--|--|--|--|--|--|--|--|--|--|--|--|--|--|--|--|--|--|--|--|--|--|--|--|--|--|--|--|--|--|--|--|--|--|--|--|--|--|--|--|--|--|--|--|--|--|--|--|--|--|--|--|--|--|--|--|--|--|--|--|--|--|--|--|--|--|--|--|--|--|--|--|--|--|--|--|--|--|--|--|--|--|--|--|--|--|--|--|--|--|--|--|--|--|--|--|--|--|--|--|--|--|--|--|--|--|--|--|--|--|--|--|--|--|--|--|--|--|--|--|--|--|--|--|--|--|--|--|--|--|--|--|--|--|--|--|--|--|--|--|--|--|--|--|--|--|--|--|--|--|--|--|--|--|--|--|--|--|--|--|--|--|--|--|--|--|--|--|--|--|--|--|--|--|--|--|--|--|--|--|--|--|--|--|--|--|--|--|--|--|--|--|--|--|--|--|--|--|--|--|--|--|--|--|--|--|--|--|--|--|--|--|--|--|--|--|--|--|--|--|--|--|--|--|--|--|--|--|--|--|--|--|--|--|--|--|--|--|--|--|--|--|--|--|--|--|--|--|--|--|--|--|--|--|--|--|--|--|--|--|--|--|--|--|--|--|--|--|--|--|--|--|--|--|--|--|--|--|--|--|--|--|--|--|--|--|--|--|--|--|--|--|--|--|--|--|--|--|--|--|--|--|--|--|--|--|--|--|--|--|--|--|--|--|--|--|--|--|--|--|--|--|--|--|--|--|--|--|--|--|--|--|--|--|--|--|--|--|--|--|--|--|--|--|--|--|--|--|--|--|--|--|--|--|--|--|--|--|--|--|--|--|--|--|--|--|--|--|--|--|--|--|--|--|--|--|--|--|--|--|--|--|--|--|--|--|--|--|--|--|--|--|--|--|--|--|--|--|--|--|--|--|--|--|--|--|--|--|--|--|--|--|--|--|--|--|--|--|--|--|--|--|--|--|--|--|--|--|--|--|--|--|--|--|--|--|--|--|--|--|--|--|--|--|--|--|--|--|--|--|--|--|--|--|--|--|--|--|--|--|--|--|--|--|--|--|--|--|--|--|--|--|--|--|--|--|--|--|--|--|--|--|--|--|--|--|--|--|--|--|--|--|--|--|--|--|--|--|--|--|--|--|--|--|--|--|--|--|--|--|--|--|--|--|--|--|--|--|--|--|--|--|--|--|--|--|--|--|--|--|--|--|--|--|--|--|--|--|--|--|--|--|--|--|--|--|--|--|--|--|--|--|--|--|--|--|--|--|--|--|--|--|--|--|--|--|--|--|--|--|--|--|--|--|--|--|--|--|--|--|--|--|--|--|--|--|--|--|--|--|--|--|--|--|--|--|--|--|--|--|--|--|--|--|--|--|--|--|--|--|--|--|--|--|--|--|--|--|--|--|--|--|--|--|--|--|--|--|--|--|--|--|--|--|--|--|--|--|--|--|--|--|--|--|--|--|--|--|--|--|--|--|--|--|--|--|--|--|--|--|--|--|--|--|--|--|--|--|--|--|--|--|--|--|--|--|--|--|--|--|--|--|--|--|--|--|--|--|--|--|--|--|--|--|--|--|--|--|--|--|--|--|--|--|--|--|--|--|--|--|--|--|--|--|--|--|--|--|--|--|--|--|--|--|--|--|--|--|--|--|--|--|--|--|--|--|--|--|--|--|--|--|--|--|--|--|--|--|--|--|--|--|--|--|--|--|--|--|--|--|--|--|--|--|--|--|--|--|--|--|--|--|--|--|--|--|--|--|--|--|--|--|--|--|--|--|--|--|--|--|--|--|--|--|--|--|--|--|--|--|--|--|--|--|--|--|--|--|--|--|--|--|--|--|--|--|--|--|--|--|--|--|--|--|--|--|--|--|--|--|--|--|--|--|--|--|--|--|--|--|--|--|--|--|--|--|--|--|--|--|--|--|--|--|--|--|--|--|--|--|--|--|--|--|--|--|--|--|--|--|--|--|--|--|--|--|--|--|--|--|--|--|--|--|--|--|--|--|--|--|--|--|--|--|--|--|--|--|--|--|--|--|--|--|--|--|--|--|--|--|--|--|--|--|--|--|--|--|--|--|--|--|--|--|--|--|--|--|--|--|--|--|--|--|--|--|--|--|--|--|--|--|--|--|--|--|--|--|--|--|--|--|--|--|--|--|--|--|--|--|--|--|--|--|--|--|--|--|--|--|--|--|--|--|--|--|--|--|--|--|--|--|--|--|--|--|--|--|--|--|--|--|--|--|--|--|--|--|--|--|--|--|--|--|--|--|--|--|--|--|--|--|--|--|--|--|--|--|--|--|--|--|--|--|--|--|--|--|--|--|--|--|--|--|--|--|--|--|--|--|--|--|--|--|--|--|--|--|--|--|--|--|--|--|--|--|--|--|--|--|--|--|--|--|--|--|--|--|--|--|--|--|--|--|--|--|--|--|--|--|--|--|--|--|--|--|--|--|--|--|--|--|--|--|--|--|--|--|--|--|--|--|--|--|--|--|--|--|--|--|--|--|--|--|--|--|--|--|--|--|--|--|--|--|--|--|--|--|--|--|--|--|--|--|--|--|--|--|--|--|--|--|--|--|--|--|--|--|--|--|--|--|--|--|--|--|--|--|--|--|--|--|--|--|--|--|--|--|--|--|--|--|--|--|--|--|--|--|--|--|--|--|--|

|  |                      |                           |                 |                                                              |                                                                                                                                                                        |             |     |   |               |       |    |                                                                                                                                                                                                                                                                                                                                                                                                                                                     |  |  |  |                                                                                                                                                                                                   |                                                                                                                                                                                                                                                                                                                     |
|--|----------------------|---------------------------|-----------------|--------------------------------------------------------------|------------------------------------------------------------------------------------------------------------------------------------------------------------------------|-------------|-----|---|---------------|-------|----|-----------------------------------------------------------------------------------------------------------------------------------------------------------------------------------------------------------------------------------------------------------------------------------------------------------------------------------------------------------------------------------------------------------------------------------------------------|--|--|--|---------------------------------------------------------------------------------------------------------------------------------------------------------------------------------------------------|---------------------------------------------------------------------------------------------------------------------------------------------------------------------------------------------------------------------------------------------------------------------------------------------------------------------|
|  |                      |                           |                 |                                                              |                                                                                                                                                                        |             |     |   |               |       |    |                                                                                                                                                                                                                                                                                                                                                                                                                                                     |  |  |  |                                                                                                                                                                                                   | (PROSITE_PROFI<br>LES); IPRO36282<br>(SUPERFAMILY);<br>IPRO36249<br>(SUPERFAMILY)                                                                                                                                                                                                                                   |
|  | Energy<br>Production | amino acid                | MMSR116_RS07215 | aspartate-semialdehyde<br>dehydrogenase                      | DHAS_AQUAE ame:<br>Full=Aspartate-semialdehyde<br>dehydrogenase Short=ASA<br>dehydrogenase<br>ame: Full=Aspartate-beta-<br>semialdehyde dehydrogenase                  | 0.950720408 | 345 | 5 | 2.68E-<br>133 | 68.2% | 6  | F:nucleotide binding; P:methionine biosynthetic<br>process; P:lysine biosynthetic process;<br>F:coenzyme binding; P:diaminopimelate<br>metabolic process; F:oxidoreductase activity,<br>acting on the aldehyde or oxo group of donors,<br>NAD or NADP as acceptor                                                                                                                                                                                   |  |  |  |                                                                                                                                                                                                   | no IPS match                                                                                                                                                                                                                                                                                                        |
|  | Energy<br>Production | amino acid                | MMSR116_RS01745 | D-amino acid dehydrogenase                                   | DADA3_RHILO ame: Full=D-<br>amino acid dehydrogenase 3                                                                                                                 | 1.202565188 | 420 | 5 | 0.00E+00      | 58%   | 2  | F:oxidoreductase activity;<br>P:D-amino acid catabolic<br>process                                                                                                                                                                                                                                                                                                                                                                                   |  |  |  | IPRO14440<br>(PIRSF);<br>G3DSA:3.40.30.<br>10 (GENE3D);<br>IPRO01853<br>(PFAM);<br>PTHR42943:SF2<br>(PANTHER);<br>PTHR42943<br>(PANTHER);<br>IPRO36249<br>(SUPERFAMILY)                           |                                                                                                                                                                                                                                                                                                                     |
|  | Energy<br>Production | amino acid<br>degradation | MMSR116_RS25555 | methylmalonate-semialdehyde<br>dehydrogenase (CoA acylating) | BAUC_PSEAE ame: Full= 3-<br>oxopropanoate dehydrogenase                                                                                                                | 0.910031492 | 498 | 5 | 0.00E+00      | 67%   | 12 | F:aldehyde dehydrogenase (NAD) activity; P:response to<br>oxidative stress; P:brown fat cell differentiation;<br>C:extracellular exosome; F:copper ion binding; P:beta-<br>alanine biosynthetic process; C:mitochondrial matrix;<br>F:methylmalonate-semialdehyde dehydrogenase (acylating)<br>activity; P:valine catabolic process; P:thymine catabolic<br>process; F:malonate-semialdehyde dehydrogenase<br>(acetylating) activity; C:nucleoplasm |  |  |  |                                                                                                                                                                                                   | PF13515<br>(PFAM);<br>IPRO32692<br>(PFAM)                                                                                                                                                                                                                                                                           |
|  | Energy<br>Production | amino acid - serine       | MMSR116_RS11755 | D-serine ammonia-lyase                                       | SDHD_PSEP1 ame:<br>Full=Probable D-serine<br>dehydratase ame: Full=D-serine<br>deaminase Short=DSD                                                                     | 1.132621646 | 429 | 5 | 1.37E-91      | 60%   | 3  | F:lyase activity; P:serine<br>family amino acid<br>metabolic process; P:D-<br>amino acid metabolic<br>process                                                                                                                                                                                                                                                                                                                                       |  |  |  | IPRO02347<br>(PRINTS);<br>IPRO02347<br>(PRINTS);<br>PF13561<br>(PFAM);<br>G3DSA:3.40.50.<br>720 (GENE3D);<br>PTHR42898:SF8<br>(PANTHER);<br>PTHR42898<br>(PANTHER);<br>IPRO36291<br>(SUPERFAMILY) |                                                                                                                                                                                                                                                                                                                     |
|  | Energy<br>Production | protease                  | MMSR116_RS01620 | serine protease                                              | DEGPL_CHLTR ame:<br>Full=Probable periplasmic<br>serine endoprotease -like ame:<br>Full=59 kDa immunogenic ame:<br>Full=Protease Do ame:<br>Full=SK59 Flags: Precursor | 1.156233945 | 324 | 5 | 1.71E-10      | 47.6% | 10 | P:proteolysis; C:membrane; C:integral component of<br>membrane; F:serine-type endopeptidase activity; F:serine-<br>type peptidase activity; C:outer membrane-bounded<br>periplasmic space; C:cell outer membrane; F:peptidase<br>activity; C:periplasmic space; F:hydrolase activity                                                                                                                                                                |  |  |  |                                                                                                                                                                                                   | IPRO04046<br>(PFAM);<br>G3DSA:1.20.105<br>0.10 (GENE3D);<br>G3DSA:3.40.30.<br>10 (GENE3D);<br>IPRO04045<br>(PFAM);<br>PTHR44051<br>(PANTHER);<br>PTHR44051:SF1<br>(PANTHER);<br>IPRO10987<br>(PROSITE_PROFI<br>LES); IPRO04045<br>(PROSITE_PROFI<br>LES); IPRO36249<br>(SUPERFAMILY);<br>IPRO36282<br>(SUPERFAMILY) |
|  | Energy<br>Production | amino acid - serine       | MMSR116_RS25615 | serine O-acetyltransferase                                   | CYSE_SALTY ame: Full=Serine<br>acetyltransferase Short=SAT<br>ame: Full=Serine transacetylase                                                                          | 1.032283522 | 283 | 5 | 6.05E-97      | 69.2% | 5  | F:serine O-acetyltransferase activity; C:cytosol;<br>C:cysteine synthase complex; P:sulfate<br>assimilation; P:cysteine biosynthetic process<br>from serine                                                                                                                                                                                                                                                                                         |  |  |  |                                                                                                                                                                                                   | IPRO18077<br>(SMART);<br>IPRO02053<br>(PFAM);<br>G3DSA:3.20.20.<br>80 (GENE3D);<br>PTHR34135:SF2<br>(PANTHER);<br>PTHR34135<br>(PANTHER);                                                                                                                                                                           |

|               |                      |                                   |                 |                                              |                                                                                                                                                                                                                         |             |     |   |               |       |    |                                                                                                                                                                                                                                                                                                                                                                                                    |  |  |                 |                                                                                                                                                                                               |                                                                                                                                                                 |
|---------------|----------------------|-----------------------------------|-----------------|----------------------------------------------|-------------------------------------------------------------------------------------------------------------------------------------------------------------------------------------------------------------------------|-------------|-----|---|---------------|-------|----|----------------------------------------------------------------------------------------------------------------------------------------------------------------------------------------------------------------------------------------------------------------------------------------------------------------------------------------------------------------------------------------------------|--|--|-----------------|-----------------------------------------------------------------------------------------------------------------------------------------------------------------------------------------------|-----------------------------------------------------------------------------------------------------------------------------------------------------------------|
|               |                      |                                   |                 |                                              |                                                                                                                                                                                                                         |             |     |   |               |       |    |                                                                                                                                                                                                                                                                                                                                                                                                    |  |  |                 |                                                                                                                                                                                               | IPR017853<br>(SUPERFAMILY)                                                                                                                                      |
|               | Energy<br>Production | amino acid - serine               | MMSR116_RS24210 | PrkA family serine protein<br>kinase         | PRKA_BACSU ame: Full=                                                                                                                                                                                                   | 1.685977014 | 650 | 3 | 0.00E+00      | 62%   | 2  | F:protein kinase activity;<br>P:protein phosphorylation                                                                                                                                                                                                                                                                                                                                            |  |  |                 |                                                                                                                                                                                               | IPR020013<br>(TIGRFAM);<br>IPR010930<br>(PFAM);<br>IPR001444<br>(PFAM);<br>PTHR30435:SF1<br>(PANTHER);<br>PTHR30435<br>(PANTHER);<br>IPR037925<br>(SUPERFAMILY) |
|               | Energy<br>Production | amino acid                        | MMSR116_RS21385 | hypothetical protein                         | PKN1_CHLPN ame: Full=Serine<br>threonine- kinase pkn1                                                                                                                                                                   | 2.033602624 | 595 | 5 | 7.45E-15      | 42.4% | 14 | F:protein homodimerization activity; C:endoplasmic<br>reticulum; F:protein kinase activity; F:protein<br>serine/threonine kinase activity; P:protein phosphorylation;<br>F:nucleotide binding; C:endoplasmic reticulum lumen; F:ATP<br>binding; F:oxidoreductase activity; F:metal ion binding;<br>P:oxidation-reduction process; P:phosphorylation;<br>F:transferase activity; F:kinase activity  |  |  |                 | G3DSA:3.40.162<br>0.10 (GENE3D);<br>TIGR01552<br>(TIGRFAM);<br>IPR006442<br>(PFAM);<br>IPR036165<br>(SUPERFAMILY)                                                                             |                                                                                                                                                                 |
|               |                      | purine metabolism,                | MMSR116_RS22755 | xanthine dehydrogenase family<br>protein     | IORB_BREDI ame:<br>Full=Isoquinoline 1-<br>oxidoreductase subunit beta                                                                                                                                                  | 1.348806998 | 731 | 5 | 6.59E-88      | 42.8% | 4  | P:regulation of cellular<br>process; F:oxidoreductase<br>activity; F:binding;<br>P:negative regulation of<br>biological process                                                                                                                                                                                                                                                                    |  |  | EC:2.7<br>.1.69 | IPR036662<br>(G3DSA:3.40.50.<br>GENE3D);<br>IPR004701<br>(PFAM);<br>PTHR33799<br>(PANTHER);<br>PTHR33799:SF1<br>(PANTHER);<br>IPR004701<br>(PROSITE_PROFI<br>LES); IPR036662<br>(SUPERFAMILY) |                                                                                                                                                                 |
|               |                      | pyrimidine<br>metabolism,         | MMSR116_RS29495 | hypothetical protein                         | CODA_ECOLI ame:<br>Full=Cytosine deaminase<br>Short=CD Short=CDA<br>Short=CDase ame: Full=Cytosine<br>aminohydrolase ame:<br>Full=Isoguanine deaminase                                                                  | 1.199115381 | 410 | 5 | 2.08E-53      | 45.2% | 9  | P:cellular nitrogen compound catabolic process; P:aromatic<br>compound catabolic process; F:transition metal ion binding;<br>P:organic cyclic compound catabolic process; F:hydrolase<br>activity, acting on carbon-nitrogen (but not peptide) bonds,<br>in cyclic amidines; C:cytoplasm; P:organonitrogen<br>compound catabolic process; P:heterocycle catabolic<br>process; F:deaminase activity |  |  |                 | no IPS match                                                                                                                                                                                  |                                                                                                                                                                 |
|               |                      | pyrimidine<br>metabolism,         | MMSR116_RS09635 | NUDIX domain-containing<br>protein           | ADPP_METJA ame: Full=ADP-<br>ribose pyrophosphatase ame:<br>Full=ADP-ribose diphosphatase<br>ame: Full=ADP-ribose<br>phosphohydrolase ame:<br>Full=Adenosine<br>diphosphoribose<br>pyrophosphatase Short=ADPR-<br>PPase | 1.888358904 | 243 | 1 | 8.32E-6       | 51%   | 3  | F:ADP-ribose<br>diphosphatase activity;<br>F:metal ion binding;<br>F:hydrolase activity                                                                                                                                                                                                                                                                                                            |  |  |                 | no IPS match                                                                                                                                                                                  |                                                                                                                                                                 |
|               |                      | biosynthesis of<br>the pyrimidine | MMSR116_RS15475 | NMT1/THIS-like domain-<br>containing protein | SSUA_ECOLI ame: Full= aliphatic<br>sulfonates-binding Flags:<br>Precursor                                                                                                                                               | 2.096549284 | 316 | 5 | 8.65E-7       | 47.8% | 10 | C:ATP-binding cassette (ABC) transporter complex,<br>substrate-binding subunit-containing; P:sulfur compound<br>metabolic process; F:alkanesulfonate transporter activity;<br>C:membrane; P:alkanesulfonate transport; C:periplasmic<br>space; P:transport; P:thiamine diphosphate biosynthetic<br>process; C:plasma membrane; P:thiamine biosynthetic<br>process                                  |  |  |                 | G3DSA:3.40.630<br>.30 (GENE3D);<br>IPR007434<br>(PFAM);<br>PTHR31384:SF4<br>2 (PANTHER);<br>PTHR31384<br>(PANTHER);<br>IPR016181<br>(SUPERFAMILY)                                             |                                                                                                                                                                 |
|               |                      | stress reponse                    | MMSR116_RS14700 | polyphosphate kinase 2                       | PK21C_RHIME ame:<br>Full=Polyphosphate:ADP<br>phosphotransferase 3 ame:<br>Full=Polyphosphate kinase PPK2<br>3                                                                                                          | 1.887535652 | 280 | 5 | 4.34E-<br>108 | 72.2% | 2  | P:phosphorylation;<br>F:polyphosphate kinase<br>activity                                                                                                                                                                                                                                                                                                                                           |  |  |                 | no IPS match                                                                                                                                                                                  |                                                                                                                                                                 |
| Cell division |                      |                                   | MMSR116_RS28465 | hypothetical protein                         | SLMA_SHEBS ame:<br>Full=Nucleoid occlusion factor                                                                                                                                                                       | 1.651132292 | 242 | 5 | 3.3E-2        | 48.4% | 9  | C:nucleoid; P:cell division; P:regulation of cell<br>division; F:DNA binding; C:bacterial nucleoid;<br>C:cytoplasm; P:negative regulation of barrier<br>septum assembly; F:sequence-specific DNA<br>binding; P:cell cycle                                                                                                                                                                          |  |  |                 | IPR001789<br>(SMART);<br>IPR001789<br>(PFAM);<br>G3DSA:3.40.50.<br>2300 (GENE3D);<br>PTHR43228<br>(PANTHER);<br>IPR001789                                                                     |                                                                                                                                                                 |

|  |  |  |                 |                                                       |                                                                                                                                                                                                     |              |     |   |               |       |    |                                                                                                                                                                                                                                                                                                                                                                                                                                                                                                                                                                                                                                                                                                                                                                                                                                                                                                                                                                                                                                                                                                                                                                                                                                                                                   |  |  |                                                                                                                                                                                                                                                                                                                                                                                    |                                                                                                                            |
|--|--|--|-----------------|-------------------------------------------------------|-----------------------------------------------------------------------------------------------------------------------------------------------------------------------------------------------------|--------------|-----|---|---------------|-------|----|-----------------------------------------------------------------------------------------------------------------------------------------------------------------------------------------------------------------------------------------------------------------------------------------------------------------------------------------------------------------------------------------------------------------------------------------------------------------------------------------------------------------------------------------------------------------------------------------------------------------------------------------------------------------------------------------------------------------------------------------------------------------------------------------------------------------------------------------------------------------------------------------------------------------------------------------------------------------------------------------------------------------------------------------------------------------------------------------------------------------------------------------------------------------------------------------------------------------------------------------------------------------------------------|--|--|------------------------------------------------------------------------------------------------------------------------------------------------------------------------------------------------------------------------------------------------------------------------------------------------------------------------------------------------------------------------------------|----------------------------------------------------------------------------------------------------------------------------|
|  |  |  |                 |                                                       |                                                                                                                                                                                                     |              |     |   |               |       |    |                                                                                                                                                                                                                                                                                                                                                                                                                                                                                                                                                                                                                                                                                                                                                                                                                                                                                                                                                                                                                                                                                                                                                                                                                                                                                   |  |  |                                                                                                                                                                                                                                                                                                                                                                                    | (PROSITE_PROFI<br>LES); IPRO11006<br>(SUPERFAMILY)                                                                         |
|  |  |  | MMSR116_RS07170 | tetratricopeptide repeat<br>protein                   | Y3534_RHIEC ame: Full=TPR<br>repeat-containing Flags:<br>Precursor                                                                                                                                  | 1.09925917   | 203 | 5 | 9.03E-20      | 51%   | 29 | P:cell proliferation; C:nucleoplasm; F:protein complex<br>scaffold; P:negative regulation of transcription, DNA-<br>templated; C:intracellular membrane-bounded organelle;<br>C:cytosol; P:metaphase/anaphase transition of mitotic cell<br>cycle; P:protein K11-linked ubiquitination; F:protein<br>phosphatase binding; C:anaphase-promoting complex;<br>C:endoplasmic reticulum; P:defense response to bacterium;<br>P:protein ubiquitination involved in ubiquitin-dependent<br>protein catabolic process; P:defense response to bacterium,<br>incompatible interaction; C:spindle microtubule; C:nucleus;<br>P:proteasome-mediated ubiquitin-dependent protein<br>catabolic process; C:centrosome; C:perinuclear region of<br>cytoplasm; F:protein binding; C:cytoplasm; C:integral<br>component of membrane; C:spindle; P:anaphase-promoting<br>complex-dependent catabolic process; P:regulation of<br>ubiquitin-protein ligase activity involved in mitotic cell cycle;<br>P:positive regulation of ubiquitin-protein ligase activity<br>involved in regulation of mitotic cell cycle transition;<br>P:negative regulation of defense response; P:protein<br>ubiquitination; P:negative regulation of ubiquitin-protein<br>ligase activity involved in mitotic cell cycle |  |  | no IPS match                                                                                                                                                                                                                                                                                                                                                                       |                                                                                                                            |
|  |  |  | MMSR116_RS12015 | cell division topological<br>specificity factor       | MINE_METRJ ame: Full=Cell<br>division topological specificity<br>factor                                                                                                                             | -1.478018814 | 112 | 5 | 2.19E-48      | 84.2% | 3  | P:cell division; P:regulation<br>of barrier septum<br>assembly; P:cell cycle                                                                                                                                                                                                                                                                                                                                                                                                                                                                                                                                                                                                                                                                                                                                                                                                                                                                                                                                                                                                                                                                                                                                                                                                      |  |  | IPRO01867<br>(SMART);<br>IPRO01789<br>(SMART);<br>IPRO01867<br>(PFAM);<br>IPRO36388<br>(G3DSA:1.10.10.<br>GENE3D);<br>G3DSA:3.40.50.<br>2300 (GENE3D);<br>IPRO01789<br>(PFAM);<br>PTHR26402:SF7<br>19 (PANTHER);<br>PTHR26402<br>(PANTHER);<br>IPRO01867<br>(PROSITE_PROFI<br>LES); IPRO01789<br>(PROSITE_PROFI<br>LES); IPRO11006<br>(SUPERFAMILY);<br>IPRO16032<br>(SUPERFAMILY) |                                                                                                                            |
|  |  |  | MMSR116_RS19700 | cell division protein FtsA                            | FTSA_AGRFC ame: Full=Cell<br>division                                                                                                                                                               | -1.208080745 | 440 | 5 | 1.23E-<br>146 | 59.6% | 4  | P:cell division; F:protein<br>binding; C:plasma<br>membrane; P:cell cycle                                                                                                                                                                                                                                                                                                                                                                                                                                                                                                                                                                                                                                                                                                                                                                                                                                                                                                                                                                                                                                                                                                                                                                                                         |  |  | G3DSA:1.10.321<br>0.10 (GENE3D);<br>IPRO03607<br>(PFAM);<br>PTHR21262:SF2<br>7 (PANTHER);<br>PTHR21262<br>(PANTHER);<br>SSF109604<br>(SUPERFAMILY)                                                                                                                                                                                                                                 |                                                                                                                            |
|  |  |  | MMSR116_RS30440 | hypothetical protein                                  | NUF2_RAT ame:<br>Full=Kinetochore Nuf2 ame:<br>Full=Cell division cycle-<br>associated 1                                                                                                            | -1.473068699 | 163 | 2 | 3.53E-5       | 54%   | 8  | P:cell division; C:nucleus; C:Ndc80 complex;<br>C:membrane; P:mitotic nuclear division;<br>C:condensed chromosome kinetochore;<br>P:transport; P:protein secretion                                                                                                                                                                                                                                                                                                                                                                                                                                                                                                                                                                                                                                                                                                                                                                                                                                                                                                                                                                                                                                                                                                                |  |  |                                                                                                                                                                                                                                                                                                                                                                                    | IPRO00182<br>(PFAM);<br>G3DSA:3.40.630<br>.30 (GENE3D);<br>IPRO00182<br>(PROSITE_PROFI<br>LES); IPRO16181<br>(SUPERFAMILY) |
|  |  |  | MMSR116_RS30380 | UDP-N-acetylglucosamine 1-<br>carboxyvinyltransferase | MURA_METRJ ame: Full=UDP-<br>N-acetylglucosamine 1-<br>carboxyvinyltransferase ame:<br>Full=Enoylpyruvate transferase<br>ame: Full=UDP-N-<br>acetylglucosamine enolpyruvyl<br>transferase Short=EPT | -1.678445869 | 429 | 5 | 0.00E+00      | 94.6% | 8  | P:regulation of cell shape; P:cell division; F:UDP-<br>N-acetylglucosamine 1-carboxyvinyltransferase<br>activity; C:cytoplasm; P:peptidoglycan<br>biosynthetic process; P:UDP-N-<br>acetylglucosamine biosynthetic process; P:cell<br>wall organization; P:cell cycle                                                                                                                                                                                                                                                                                                                                                                                                                                                                                                                                                                                                                                                                                                                                                                                                                                                                                                                                                                                                             |  |  |                                                                                                                                                                                                                                                                                                                                                                                    | no IPS match                                                                                                               |



|           |  |                                                           |                 |                                              |                                                                                                                                                                                                                                                                                                                                                                                                                         |             |     |   |          |        |    |                                                                                                                                                                                                                                                                                                                                                                                                                                                                                                                                                                                                                               |  |  |                                                                         |                                                                                                                                                                                                                                             |
|-----------|--|-----------------------------------------------------------|-----------------|----------------------------------------------|-------------------------------------------------------------------------------------------------------------------------------------------------------------------------------------------------------------------------------------------------------------------------------------------------------------------------------------------------------------------------------------------------------------------------|-------------|-----|---|----------|--------|----|-------------------------------------------------------------------------------------------------------------------------------------------------------------------------------------------------------------------------------------------------------------------------------------------------------------------------------------------------------------------------------------------------------------------------------------------------------------------------------------------------------------------------------------------------------------------------------------------------------------------------------|--|--|-------------------------------------------------------------------------|---------------------------------------------------------------------------------------------------------------------------------------------------------------------------------------------------------------------------------------------|
| Transport |  | K+ channels                                               | MMSR116_RS24965 | mechanosensitive ion channel family protein  | ---NA---                                                                                                                                                                                                                                                                                                                                                                                                                | 1.174333667 | 374 |   |          |        |    |                                                                                                                                                                                                                                                                                                                                                                                                                                                                                                                                                                                                                               |  |  |                                                                         | no IPS match                                                                                                                                                                                                                                |
|           |  | Anion transporter                                         | MMSR116_RS02620 | oxalate/formate MFS antiporter               | OXLT_OXAFO ame:<br>Full=Oxalate:formate antiporter<br>Short=OFA ame:<br>Full=Oxalate:formate antiport<br>ame: Full=Oxalate:formate<br>exchange                                                                                                                                                                                                                                                                          | 1.004986847 | 425 | 5 | 4.22E-61 | 45%    | 3  | C:membrane; C:cell part;<br>P:transport                                                                                                                                                                                                                                                                                                                                                                                                                                                                                                                                                                                       |  |  |                                                                         | no IPS match                                                                                                                                                                                                                                |
|           |  | anion transporters                                        | MMSR116_RS21710 | STAS/SEC14 domain-containing protein         | ---NA---                                                                                                                                                                                                                                                                                                                                                                                                                | 1.11312872  | 120 |   |          |        |    |                                                                                                                                                                                                                                                                                                                                                                                                                                                                                                                                                                                                                               |  |  |                                                                         | no IPS match                                                                                                                                                                                                                                |
|           |  | ion transport                                             | MMSR116_RS16110 | citrate transporter                          | MEMP_CUPNH ame:<br>Full=Membrane                                                                                                                                                                                                                                                                                                                                                                                        | 2.649028173 | 432 | 1 | 3.51E-10 | 46%    | 6  | P:sodium ion transport; P:transmembrane<br>transport; C:membrane; C:integral component of<br>membrane; F:transporter activity; C:plasma<br>membrane                                                                                                                                                                                                                                                                                                                                                                                                                                                                           |  |  |                                                                         | no IPS match                                                                                                                                                                                                                                |
|           |  | inorganic anion uptake transporters                       | MMSR116_RS01695 | SulP family inorganic anion transporter      | YVDB_BACSU ame: Full= sulfate<br>transporter                                                                                                                                                                                                                                                                                                                                                                            | 1.285344313 | 516 | 2 | 1.12E-3  | 59.5%  | 17 | P:sulfate transport; P:L-aspartate transmembrane transport;<br>P:fumarate transport; F:secondary active sulfate<br>transmembrane transporter activity; P:transmembrane<br>transport; F:succinate transmembrane transporter activity;<br>P:sulfate transmembrane transport; F:L-aspartate<br>transmembrane transporter activity; P:transport; C:plasma<br>membrane; C:integral component of plasma membrane;<br>C:membrane; C:integral component of membrane;<br>P:succinate transmembrane transport; P:aspartate<br>transport; F:fumarate transmembrane transporter activity;<br>F:sulfate transmembrane transporter activity |  |  | IPR006698<br>(PFAM);<br>IPR006698<br>(PANTHER);<br>IPR006698<br>(HAMAP) |                                                                                                                                                                                                                                             |
|           |  | sulfate exporter                                          | MMSR116_RS08495 | putative sulfate exporter family transporter | Y3189_BRADU ame:<br>Full=UPF0324 membrane<br>blr3189                                                                                                                                                                                                                                                                                                                                                                    | 1.44770817  | 362 | 5 | 8.49E-96 | 73.4%  | 1  | C:membrane                                                                                                                                                                                                                                                                                                                                                                                                                                                                                                                                                                                                                    |  |  |                                                                         | IPR019284<br>(PFAM)                                                                                                                                                                                                                         |
|           |  | sugars, drugs, metabolites, oligosaccharides, amino acids | MMSR116_RS22290 | MFS transporter                              | MMLH_CUPPJ ame:<br>Full=Probable 4-<br>methylmuconolactone<br>transporter                                                                                                                                                                                                                                                                                                                                               | 1.0875658   | 434 | 5 | 2.72E-82 | 51.2%  | 2  | P:transport; F:transporter<br>activity                                                                                                                                                                                                                                                                                                                                                                                                                                                                                                                                                                                        |  |  |                                                                         | IPR014025<br>(PRINTS);<br>IPR011900<br>(TIGRFAM);<br>IPR002109<br>(PFAM);<br>G3DSA:3.40.30.<br>10 (GENE3D);<br>PTHR10168:SF1<br>80 (PANTHER);<br>PTHR10168<br>(PANTHER);<br>IPR002109<br>(PROSITE_PROFI<br>LES); IPR036249<br>(SUPERFAMILY) |
|           |  |                                                           | MMSR116_RS27205 | MFS transporter                              | YUSP_BACSU ame:<br>Full=Uncharacterized MFS-type<br>transporter                                                                                                                                                                                                                                                                                                                                                         | 1.368803508 | 490 | 5 | 1.78E-60 | 49.8%  | 7  | P:transmembrane transport; C:membrane;<br>C:integral component of membrane; P:response<br>to antibiotic; P:transport; C:plasma membrane;<br>F:transporter activity                                                                                                                                                                                                                                                                                                                                                                                                                                                            |  |  |                                                                         | IPR008258<br>(PFAM);<br>G3DSA:1.10.530<br>.10 (GENE3D);<br>IPR023346<br>(SUPERFAMILY)                                                                                                                                                       |
|           |  |                                                           | MMSR116_RS21120 | MFS transporter                              | YQJV_BACSU ame:<br>Full=Uncharacterized MFS-type<br>transporter                                                                                                                                                                                                                                                                                                                                                         | 1.63659724  | 398 | 3 | 1.36E-3  | 47.33% | 8  | P:transmembrane transport; C:membrane;<br>C:integral component of membrane; P:aldonate<br>transport; P:transport; F:organic anion<br>transmembrane transporter activity; C:plasma<br>membrane; F:transporter activity                                                                                                                                                                                                                                                                                                                                                                                                         |  |  |                                                                         | no IPS match                                                                                                                                                                                                                                |
|           |  |                                                           | MMSR116_RS07435 | MFS transporter                              | YDHP_ECOLI ame: Full=inner<br>membrane transport                                                                                                                                                                                                                                                                                                                                                                        | 1.284195567 | 391 | 5 | 2.51E-52 | 58.4%  | 1  | C:plasma membrane                                                                                                                                                                                                                                                                                                                                                                                                                                                                                                                                                                                                             |  |  |                                                                         | IPR007833<br>(PFAM)                                                                                                                                                                                                                         |
|           |  | carbohydrate transport uptake                             | MMSR116_RS15270 | PTS fructose transporter subunit IIA         | PTNAB_ECOLI ame: Full=PTS<br>system mannose-specific EIIB<br>component ame: Full=EIIAB-<br>Man ame: Full=EIII-Man<br>Includes: ame: Full=Mannose-<br>specific phosphotransferase<br>enzyme IIA component ame:<br>Full=PTS system mannose-<br>specific EIIB component<br>Includes: ame: Full=Mannose-<br>specific phosphotransferase<br>enzyme IIB component ame:<br>Full=PTS system mannose-<br>specific EIIB component | 1.275389799 | 133 | 5 | 6.94E-11 | 51.4%  | 4  | C:cytoplasm; C:integral component of<br>membrane; F:protein-N(P)-phosphohistidine-<br>sugar phosphotransferase activity; P:hexose<br>transport                                                                                                                                                                                                                                                                                                                                                                                                                                                                                |  |  | EC:1.8<br>.4.11                                                         | IPR002569<br>(PFAM);<br>IPR002569<br>(TIGRFAM);<br>IPR036509<br>(G3DSA:3.30.10<br>60.GENE3D);<br>PTHR42799:SF2<br>(PANTHER);<br>PTHR42799<br>(PANTHER);<br>IPR002569<br>(HAMAP);<br>IPR036509<br>(SUPERFAMILY)                              |

|  |  |                               |                 |                                                   |                                                                                                         |              |     |   |          |       |   |                                                                                                                                                                                                                              |  |  |                         |                                                                                                                                                                                                |
|--|--|-------------------------------|-----------------|---------------------------------------------------|---------------------------------------------------------------------------------------------------------|--------------|-----|---|----------|-------|---|------------------------------------------------------------------------------------------------------------------------------------------------------------------------------------------------------------------------------|--|--|-------------------------|------------------------------------------------------------------------------------------------------------------------------------------------------------------------------------------------|
|  |  | facilitates protein transport | MMSR116_RS16730 | nuclear transport factor 2 family protein         | ---NA---                                                                                                | 1.449285575  | 143 |   |          |       |   |                                                                                                                                                                                                                              |  |  |                         | no IPS match                                                                                                                                                                                   |
|  |  | amino acid                    | MMSR116_RS20220 | dicarboxylate/amino acid:cation symporter         | DCTA_GEOBB ame: Full=C4-dicarboxylate transport                                                         | 1.272086242  | 425 | 5 | 1.54E-76 | 61%   | 2 | P:dicarboxylic acid transport; C:membrane                                                                                                                                                                                    |  |  |                         | IPR011780 (TIGRFAM); G3DSA:3.40.50.1100 (GENE3D); G3DSA:3.40.50.1100 (GENE3D); IPR001926 (PFAM); PTHR43419 (PANTHER); IPR011780 (PTHR43419:PA NTH); IPR011780 (HAMAP); IPR036052 (SUPERFAMILY) |
|  |  | amino acid                    | MMSR116_RS15440 | dicarboxylate/amino acid:cation symporter         | DCTA_OCHA4 ame: Full=C4-dicarboxylate transport                                                         | -1.609513405 | 447 | 5 | 0.00E+00 | 85.2% | 5 | P:dicarboxylic acid transport; P:transmembrane transport; C:integral component of membrane; F:symporter activity; C:plasma membrane                                                                                          |  |  |                         | IPR036707 (G3DSA:3.30.10.70.GENE3D); IPR005527 (TIGRFAM); IPR005527 (PFAM); IPR005527 (PANTHER); PTHR33404:SF2 (PANTHER); IPR005527 (HAMAP); IPR036707 (SUPERFAMILY)                           |
|  |  | amino acid - leucine          | MMSR116_RS29515 | ABC transporter substrate-binding protein         | LIVK_ECOLI ame: Full=Leucine-specific-binding Short=L-BP Short=LS-BP Flags: Precursor                   | 1.549732529  | 393 | 5 | 1.38E-14 | 43.2% | 1 | P:amino acid transport                                                                                                                                                                                                       |  |  |                         | IPR017102 (PIRSF); IPR014710 (G3DSA:2.60.12.0.GENE3D); IPR013096 (PFAM); IPR011051 (SUPERFAMILY)                                                                                               |
|  |  | amino acid - glutamine        | MMSR116_RS29475 | ABC transporter substrate-binding protein         | GLNH_BACSU ame: Full=ABC transporter glutamine-binding Flags: Precursor                                 | 1.119526118  | 279 | 5 | 1.02E-19 | 47.6% | 9 | C:membrane; C:periplasmic space; P:ionotropic glutamate receptor signaling pathway; F:ionotropic glutamate receptor activity; P:transport; P:amino acid transport; C:plasma membrane; F:transporter activity; C:cell surface |  |  |                         | IPR021252 (PFAM)                                                                                                                                                                               |
|  |  | cobalamin - vit B (Co+N)      | MMSR116_RS08125 | ABC transporter substrate-binding protein         | BTUFA_HALSA ame: Full=Cobalamin-binding ame: Full=Vitamin B12-binding Flags: Precursor                  | -0.98222713  | 277 | 5 | 2.97E-10 | 42.6% | 8 | F:cobalamin binding; C:membrane; F:small molecule binding; C:outer membrane-bounded periplasmic space; C:periplasmic space; P:cobalamin transport; P:transport; C:plasma membrane                                            |  |  |                         | IPR036388 (G3DSA:1.10.10.10.GENE3D); G3DSA:3.90.79.10 (GENE3D); IPR000086 (PFAM); PTHR22769 (PANTHER); PTHR22769:SF5 9 (PANTHER); IPR036390 (SUPERFAMILY); IPR015797 (SUPERFAMILY)             |
|  |  | sulfate importer              | MMSR116_RS22370 | sulfate ABC transporter substrate-binding protein | SUBI_ECOLI ame: Full=Sulfate-binding ame: Full=Sulfate starvation-induced 2 Short=SSI2 Flags: Precursor | -1.344937858 | 345 | 5 | 1.4E-115 | 65%   | 4 | P:sulfur compound metabolic process; F:sulfate binding; C:outer membrane-bounded periplasmic space; P:transport                                                                                                              |  |  |                         | IPR007390 (PFAM); IPR007390 (PANTHER)                                                                                                                                                          |
|  |  | heme (Fe)                     | MMSR116_RS08115 | ABC transporter ATP-binding protein               | HMOV_PSEPK ame: Full=Hemin import ATP-binding                                                           | -1.165754767 | 271 | 5 | 1.21E-45 | 58%   | 3 | F:ATPase activity, coupled to transmembrane movement of substances; P:transport; C:plasma membrane                                                                                                                           |  |  | EC:3.4 .24; EC:3.6 .1.3 | IPR003593 (SMART); IPR000642 (PFAM); G3DSA:2.40.50.920 (GENE3D);                                                                                                                               |



|  |  |               |                 |                                        |                                                                          |              |     |   |               |       |    |                                                                                                                                                                                                                                                                                  |  |  |                                                                                                                                                                                                                                                                                                                                  |
|--|--|---------------|-----------------|----------------------------------------|--------------------------------------------------------------------------|--------------|-----|---|---------------|-------|----|----------------------------------------------------------------------------------------------------------------------------------------------------------------------------------------------------------------------------------------------------------------------------------|--|--|----------------------------------------------------------------------------------------------------------------------------------------------------------------------------------------------------------------------------------------------------------------------------------------------------------------------------------|
|  |  |               |                 |                                        |                                                                          |              |     |   |               |       |    |                                                                                                                                                                                                                                                                                  |  |  | G3DSA:1.10.8.6<br>O (GENE3D);<br>G3DSA:3.40.50.<br>300 (GENE3D);<br>IPR005936<br>(TIGRFAM);<br>G3DSA:1.20.58.<br>760 (GENE3D);<br>IPR011546<br>(PFAM);<br>IPR003959<br>(PFAM);<br>PTHR23076:SF9<br>3 (PANTHER);<br>PTHR23076<br>(PANTHER);<br>IPR005936<br>(HAMAP);<br>IPR027417<br>(SUPERFAMILY);<br>IPR037219<br>(SUPERFAMILY) |
|  |  | iron importer | MMSR116_RS08120 | iron ABC transporter permease          | YVRB_BACSU ame:<br>Full=Uncharacterized ABC<br>transporter permease      | -1.125429077 | 348 | 5 | 9.46E-9       | 60.2% | 9  | P:iron ion homeostasis; F:cobalamin transporter<br>activity; P:ion transport; C:membrane; C:integral<br>component of membrane; P:cobalamin<br>transport; P:transport; C:plasma membrane;<br>F:transporter activity                                                               |  |  | IPR020471<br>(PRINTS);<br>IPR023210<br>(PFAM);<br>IPR036812<br>(G3DSA:3.20.20.<br>GENE3D);<br>IPR020471<br>(PIRSF);<br>PTHR43827:SF3<br>(PANTHER);<br>PTHR43827<br>(PANTHER);<br>IPR036812<br>(SUPERFAMILY)                                                                                                                      |
|  |  |               | MMSR116_RS28065 | TonB-dependent siderophore<br>receptor | FCT_DICD3 ame:<br>Full=Ferrichrysobactin receptor<br>Flags: Precursor    | 1.83532312   | 780 | 5 | 1.28E-<br>100 | 50.6% | 2  | C:membrane; F:binding                                                                                                                                                                                                                                                            |  |  | G3DSA:1.10.10.<br>1550 (GENE3D);<br>IPR008807<br>(PFAM)                                                                                                                                                                                                                                                                          |
|  |  |               | MMSR116_RS13925 | TonB-dependent receptor                | YNCD_ECOLI ame:<br>Full=Probable -dependent<br>receptor Flags: Precursor | -1.748519161 | 856 | 5 | 2.04E-9       | 48.2% | 12 | F:cobalamin transporter activity; P:ion transport;<br>P:transmembrane transport; F:porin activity;<br>F:metal ion binding; C:membrane; C:integral<br>component of membrane; C:pore complex; C:cell<br>outer membrane; P:cobalamin transport;<br>F:receptor activity; P:transport |  |  | IPR001107<br>(PFAM)                                                                                                                                                                                                                                                                                                              |
|  |  |               | MMSR116_RS23315 | TonB-dependent siderophore<br>receptor | FCT_DICD3 ame:<br>Full=Ferrichrysobactin receptor<br>Flags: Precursor    | -1.047502856 | 639 | 5 | 2.65E-52      | 43.6% | 1  | F:binding                                                                                                                                                                                                                                                                        |  |  | IPR002295<br>(PRINTS);<br>IPR003115<br>(SMART);<br>IPR015840<br>(PIRSF);<br>G3DSA:3.90.153<br>0.30 (GENE3D);<br>G3DSA:3.40.50.<br>150 (GENE3D);<br>IPR002941<br>(PFAM);<br>IPR003115<br>(PFAM);<br>PTHR13370<br>(PANTHER);<br>PTHR13370:SF8<br>(PANTHER);<br>IPR029063<br>(SUPERFAMILY);<br>IPR036086<br>(SUPERFAMILY)           |
|  |  |               | MMSR116_RS21805 | TonB-dependent siderophore<br>receptor | FOXA_SALTS ame:<br>Full=Ferrioxamine B receptor<br>Flags: Precursor      | -1.511467015 | 727 | 5 | 1.81E-21      | 39%   | 1  | F:binding                                                                                                                                                                                                                                                                        |  |  | IPR009656<br>(PFAM);<br>IPR010915<br>(PIRSF);<br>IPR010915<br>(TIGRFAM);                                                                                                                                                                                                                                                         |

[illegible]

|                           |  |                                                                  |                 |                                             |                                                                                                                                                                                                 |              |     |   |          |       |   |                                                                                                                                                                                                                                                                                            |  |  |  |                                                                                                                                                                                            |
|---------------------------|--|------------------------------------------------------------------|-----------------|---------------------------------------------|-------------------------------------------------------------------------------------------------------------------------------------------------------------------------------------------------|--------------|-----|---|----------|-------|---|--------------------------------------------------------------------------------------------------------------------------------------------------------------------------------------------------------------------------------------------------------------------------------------------|--|--|--|--------------------------------------------------------------------------------------------------------------------------------------------------------------------------------------------|
|                           |  |                                                                  |                 |                                             |                                                                                                                                                                                                 |              |     |   |          |       |   |                                                                                                                                                                                                                                                                                            |  |  |  | (G3DSA:1.20.58-GENE3D);<br>IPR002583<br>(PFAM);<br>PTHR33398:SF1<br>(PANTHER);<br>IPR002583<br>(PANTHER);<br>IPR002583<br>(PRODOM);<br>IPR002583<br>(HAMAP);<br>IPR036510<br>(SUPERFAMILY) |
|                           |  |                                                                  | MMSR116_RS24035 | lipopolysaccharide biosynthesis protein     | WZXC_ECOLI ame: Full=Lipopolysaccharide biosynthesis                                                                                                                                            | -1.279064241 | 477 | 4 | 1.67E-29 | 44.5% | 1 | C:membrane                                                                                                                                                                                                                                                                                 |  |  |  | IPR006685<br>(PFAM);<br>PTHR30566<br>(PANTHER);<br>PTHR30566:SF5<br>(PANTHER);<br>IPR010920<br>(SUPERFAMILY)                                                                               |
|                           |  |                                                                  | MMSR116_RS20520 | capsule polysaccharide biosynthesis protein | KPSS5_ECOLX ame: Full=Capsule polysaccharide export                                                                                                                                             | -1.254505444 | 435 | 4 | 2.95E-60 | 48%   | 7 | P:polysaccharide transport; P:polysaccharide biosynthetic process; C:membrane; P:carbohydrate transport; P:nitrogen fixation; P:transport; C:plasma membrane                                                                                                                               |  |  |  | IPR038740<br>(PFAM);<br>IPR016181<br>(SUPERFAMILY)                                                                                                                                         |
|                           |  |                                                                  | MMSR116_RS14895 | group 1 glycosyl transferase                | MSHA_JONDD ame: Full=D-inositol 3-phosphate glycosyltransferase ame: Full=N-acetylglucosamine-inositol-phosphate N-acetylglucosaminyltransferase Short= c-ins-P N-acetylglucosaminyltransferase | -1.339501171 | 408 | 5 | 3.49E-11 | 42.8% | 6 | F:magnesium ion binding; F:transferase activity, transferring glycosyl groups; F:acetylglucosaminyltransferase activity; F:metal ion binding; F:transferase activity; P:mycothiol biosynthetic process                                                                                     |  |  |  | no IPS match                                                                                                                                                                               |
| Biofilm and cell adhesion |  | Biofilm and cell adhesion                                        | MMSR116_RS19060 | hypothetical protein                        | CSGA_SALTY ame: Full=Major curlin subunit ame: Full=Fimbrin SEF17 Flags: Precursor                                                                                                              | -1.247862243 | 695 | 3 | 1.22E-5  | 57%   | 4 | P:single-species biofilm formation; P:cell adhesion; C:pilus; P:amyloid fibril formation                                                                                                                                                                                                   |  |  |  | no IPS match                                                                                                                                                                               |
|                           |  | BIOFILM                                                          | MMSR116_RS21670 | hypothetical protein                        | ALGJ_PSEFL ame: Full=Probable alginate O-acetylase ame: Full=Alginate biosynthesis Flags: Precursor                                                                                             | 1.264019029  | 320 | 4 | 7.39E-9  | 45.5% | 7 | F:transferase activity, transferring acyl groups; C:membrane; P:alginic acid biosynthetic process; C:periplasmic space; P:alginic acid acetylation; F:transferase activity; C:plasma membrane                                                                                              |  |  |  | G3DSA:1.20.125.0.20 (GENE3D);<br>IPR011701<br>(PFAM);<br>PTHR43124:SF3<br>(PANTHER);<br>PTHR43124<br>(PANTHER);<br>IPR020846<br>(PROSITE_PROFILE);<br>IPR036259<br>(SUPERFAMILY)           |
|                           |  | cell adhesion                                                    | MMSR116_RS30445 | Flp family type IVb pilin                   | cell adhesion                                                                                                                                                                                   | -1.125668136 | 54  |   |          |       |   |                                                                                                                                                                                                                                                                                            |  |  |  | IPR009915<br>(PFAM);<br>G3DSA:1.20.120.1630<br>(GENE3D);<br>IPR033580<br>(PANTHER)                                                                                                         |
|                           |  | cell adhesion                                                    | MMSR116_RS12315 | outer membrane protein assembly factor BamA | BAMA_NEIMB ame: Full=Outer membrane assembly factor ame: Full=Outer membrane Omp85 Flags: Precursor                                                                                             | -1.194987442 | 856 | 5 | 2.67E-73 | 43.2% | 7 | P:membrane assembly; P:Gram-negative-bacterium-type cell outer membrane assembly; C:membrane; C:integral component of membrane; C:outer membrane; C:outer membrane; P:protein insertion into membrane                                                                                      |  |  |  | IPR010275<br>(PFAM);<br>IPR009045<br>(G3DSA:3.30.13.80.GENE3D);<br>IPR009045<br>(SUPERFAMILY)                                                                                              |
|                           |  | cell adhesion                                                    | MMSR116_RS22310 | outer membrane protein assembly factor BamE | BAME_VIBCH ame: Full=Outer membrane assembly factor Flags: Precursor                                                                                                                            | -1.147066215 | 165 | 5 | 6.07E-5  | 52.6% | 5 | P:Gram-negative-bacterium-type cell outer membrane assembly; C:membrane; C:cell outer membrane; C:outer membrane; P:protein insertion into membrane                                                                                                                                        |  |  |  | G3DSA:2.40.160.20 (GENE3D);<br>PTHR34001<br>(PANTHER);<br>IPR011250<br>(SUPERFAMILY)                                                                                                       |
| Pigments                  |  | Photosynthesis - light-independent protochlorophyllide reductase | MMSR116_RS21975 | ferredoxin:protochlorophyllide reductase    | BCHL_METRJ ame: Full=Light-independent protochlorophyllide reductase iron-sulfur ATP-binding                                                                                                    | 1.830028914  | 297 | 5 | 0.00E+00 | 96.2% | 8 | F:ATP binding; F:oxidoreductase activity, acting on the CH-group of donors, iron-sulfur protein as acceptor; F:metal ion binding; P:photosynthesis, dark reaction; P:light-independent bacteriochlorophyll biosynthetic process; P:oxidation-reduction process; F:4 iron, 4 sulfur cluster |  |  |  | no IPS match                                                                                                                                                                               |

|  |  |                                 |                 |                                            |                                                                                                                      |             |     |   |           |       |   |                                                                                                                                                                                                                     |                                                                              |                                                                                                                                                                                                                                                                                                                                                                                                                                                                                                                                                                                                              |
|--|--|---------------------------------|-----------------|--------------------------------------------|----------------------------------------------------------------------------------------------------------------------|-------------|-----|---|-----------|-------|---|---------------------------------------------------------------------------------------------------------------------------------------------------------------------------------------------------------------------|------------------------------------------------------------------------------|--------------------------------------------------------------------------------------------------------------------------------------------------------------------------------------------------------------------------------------------------------------------------------------------------------------------------------------------------------------------------------------------------------------------------------------------------------------------------------------------------------------------------------------------------------------------------------------------------------------|
|  |  |                                 |                 |                                            | Short=DPOR subunit L Short=LI-POR subunit L                                                                          |             |     |   |           |       |   |                                                                                                                                                                                                                     | binding; F:oxidoreductase activity, acting on iron-sulfur proteins as donors |                                                                                                                                                                                                                                                                                                                                                                                                                                                                                                                                                                                                              |
|  |  | Photosynthesis                  | MMSR116_RS09450 | photosystem reaction center subunit H      | ---NA---                                                                                                             | 1.440146213 | 113 |   |           |       |   |                                                                                                                                                                                                                     |                                                                              | IPR038696 (G3DSA:2.60.40. GENE3D); IPR010642 (PFAM)                                                                                                                                                                                                                                                                                                                                                                                                                                                                                                                                                          |
|  |  | bacteriochlorophyll             | MMSR116_RS21940 | bacteriochlorophyll/chlorophyll synthetase | BCHG_RHOS4 ame: Full=Bacteriochlorophyll synthase 33 kDa chain ame: Full=Geranylgeranyl bacteriochlorophyll synthase | 1.317214714 | 294 | 5 | 1.08E-108 | 61.6% | 4 | F:prenyltransferase activity; C:membrane; C:chloroplast thylakoid; P:bacteriochlorophyll biosynthetic process                                                                                                       | EC:1.1 .99.8; EC:1.1 .2.8                                                    | IPR018391 (SMART); G3DSA:2.140.10 .10 (GENE3D); IPR017512 (TIGRFAM); IPR002372 (PFAM); IPR002372 (PFAM); PTHR32303 (PANTHER); PTHR32303:SF1 6 (PANTHER); IPR011047 (SUPERFAMILY)                                                                                                                                                                                                                                                                                                                                                                                                                             |
|  |  | carotenoid biosynthetic process | MMSR116_RS09475 | cytochrome P450                            | LUT5_ARATH ame: Full= LUTEIN DEFICIENT chloroplastic ame: Full=Cytochrome P450 97A3 Flags: Precursor                 | 1.110792955 | 462 | 5 | 1.92E-52  | 49.4% | 6 | P:carotenoid biosynthetic process; F:oxidoreductase activity, acting on paired donors, with incorporation or reduction of molecular oxygen; C:membrane; C:chloroplast envelope; F:binding; F:monooxygenase activity | EC:2.7 .7.65; EC:3.1 .4.52                                                   | IPR000160 (SMART); IPR003660 (SMART); IPR000014 (SMART); IPR001633 (SMART); G3DSA:3.30.70. 270 (GENE3D); IPR035919 (G3DSA:3.20.20. GENE3D); PF12860 (PFAM); IPR001633 (PFAM); IPR000014 (PFAM); IPR003660 (PFAM); IPR024478 (PFAM); G3DSA:1.20.148 0.50 (GENE3D); G3DSA:3.30.450 .20 (GENE3D); IPR000160 (TIGRFAM); IPR000160 (PFAM); PTHR44757 (PANTHER); PTHR44757:SF2 (PANTHER); IPR003660 (PROSITE_PROFI LES); IPR000160 (PROSITE_PROFI LES); IPR001633 (PROSITE_PROFI LES); IPR035965 (SUPERFAMILY); IPR029787 (SUPERFAMILY); SSF158472 (SUPERFAMILY); IPR035965 (SUPERFAMILY); IPR035919 (SUPERFAMILY) |

|  |  |                                 |                 |                                      |                                                                                              |              |     |   |           |       |   |                                                                                                                                                                                                                                                                   |  |                                                                                                                                                                                                                                                                                                                     |
|--|--|---------------------------------|-----------------|--------------------------------------|----------------------------------------------------------------------------------------------|--------------|-----|---|-----------|-------|---|-------------------------------------------------------------------------------------------------------------------------------------------------------------------------------------------------------------------------------------------------------------------|--|---------------------------------------------------------------------------------------------------------------------------------------------------------------------------------------------------------------------------------------------------------------------------------------------------------------------|
|  |  | pigment precursor               | MMSR116_RS21930 | geranylgeranyl diphosphate reductase | BCHP_RHOCB ame: Full=Geranylgeranyl diphosphate reductase ame: Full=Geranylgeranyl reductase | 1.325018272  | 408 | 5 | 1.04E-121 | 54%   | 8 | P:chlorophyll biosynthetic process; F:oxidoreductase activity; C:membrane; C:chloroplast thylakoid; C:chloroplast envelope; F:binding; P:phospholipid metabolic process; P:terpenoid metabolic process                                                            |  | no IPS match                                                                                                                                                                                                                                                                                                        |
|  |  | chemotaxis                      | MMSR116_RS22055 | HAMP domain-containing protein       | MCP4_THEMA ame: Full=Methyl-accepting chemotaxis 4                                           | -1.290457648 | 579 | 5 | 5.11E-54  | 50%   | 6 | P:chemotaxis; P:signal transduction; C:membrane; C:integral component of membrane; F:signal transducer activity; C:plasma membrane                                                                                                                                |  | IPR010432 (PFAM)                                                                                                                                                                                                                                                                                                    |
|  |  | chemotaxis                      | MMSR116_RS26365 | chemotaxis phosphatase CheZ          | CHEZ_SHELP ame: Full=phosphatase ame: Full=Chemotaxis                                        | -1.02637435  | 177 | 2 | 3.61E-5   | 38%   | 9 | P:chemotaxis; F:phosphoprotein phosphatase activity; C:bacterial-type flagellum; P:archaeal or bacterial-type flagellum-dependent cell motility; C:cytoplasm; F:catalytic activity; P:protein dephosphorylation; P:regulation of chemotaxis; F:hydrolase activity |  | IPR000943 (PRINTS); G3DSA:1.20.140.160 (GENE3D); IPR009042 (PFAM); IPR007630 (PFAM); IPR012759 (TIGRFAM); IPR014284 (TIGRFAM); IPR007627 (PFAM); IPR000943 (PIRSF); G3DSA:1.20.120.1810 (GENE3D); PTHR30376:SF4 (PANTHER); PTHR30376 (PANTHER); IPR012759 (HAMAP); IPR013325 (SUPERFAMILY); IPR013324 (SUPERFAMILY) |
|  |  | chemotaxis                      | MMSR116_RS26370 | response regulator                   | CHEY_ENTCL ame: Full=Chemotaxis                                                              | -1.14629955  | 127 | 5 | 6.09E-43  | 71.2% | 8 | F:magnesium ion binding; P:chemotaxis; F:protein binding; F:acetyltransferase activity; P:internal peptidyl-lysine acetylation; P:phosphorelay signal transduction system; C:cytosol; P:bacterial-type flagellum-dependent cell motility                          |  | IPR004329 (PFAM); G3DSA:2.40.50.140 (GENE3D); IPR004329 (PANTHER); IPR004329 (HAMAP); IPR036127 (SUPERFAMILY)                                                                                                                                                                                                       |
|  |  | signal transduction             | MMSR116_RS00370 | histidine kinase                     | LOVHK_BRUA1 ame: Full=Blue-light-activated histidine kinase                                  | 1.13915372   | 239 | 5 | 7.3E-19   | 51.2% | 1 | P:cellular process                                                                                                                                                                                                                                                |  | no IPS match                                                                                                                                                                                                                                                                                                        |
|  |  | Signalling                      | MMSR116_RS25880 | GGDEF domain-containing protein      | VDCA_VIBCH ame: Full=Diguanylate cyclase Short=DGC                                           | -1.171911306 | 352 | 5 | 1.5E-46   | 55.6% | 6 | F:diguanylate cyclase activity; F:protein binding; P:negative regulation of cellular component movement; P:single-species submerged biofilm formation; P:single-organism process; C:plasma membrane                                                               |  | IPR001128 (PRINTS); IPR002401 (PRINTS); IPR001128 (PFAM); IPR036396 (G3DSA:1.10.63.0.GENE3D); PTHR24291 (PANTHER); PTHR24291:SF109 (PANTHER); IPR036396 (SUPERFAMILY)                                                                                                                                               |
|  |  | signal transduction,            | MMSR116_RS21395 | calcium-binding protein              | FRP3_NEIMB ame: Full=Iron-regulated                                                          | 1.072778802  | 174 | 5 | 6.81E-22  | 64.6% | 2 | C:membrane; P:multi-organism process                                                                                                                                                                                                                              |  | no IPS match                                                                                                                                                                                                                                                                                                        |
|  |  | signal transduction AMPc        | MMSR116_RS05500 | cyclic nucleotide-binding protein    | YCCS_ECOLI ame: Full=Inner membrane                                                          | 1.323197794  | 721 | 5 | 1.57E-5   | 44.4% | 3 | C:membrane; C:integral component of membrane; C:plasma membrane                                                                                                                                                                                                   |  | PTHR34001 (PANTHER); IPR011250 (SUPERFAMILY)                                                                                                                                                                                                                                                                        |
|  |  | regulatory role bind AMP or ATP | MMSR116_RS09735 | CBS domain-containing protein        | CBSX3_ARATH ame: Full=CBS domain-containing mitochondrial Flags: Precursor                   | 0.983207739  | 143 | 5 | 2.35E-17  | 56%   | 2 | F:metal ion binding; P:single-organism cellular process                                                                                                                                                                                                           |  | IPR013108 (PFAM); IPR011059                                                                                                                                                                                                                                                                                         |



|  |  |  |  |  |  |  |  |  |  |  |  |  |  |  |  |  |  |  |  |  |  |  |  |  |  |  |  |  |  |  |  |  |  |  |  |  |  |  |  |  |  |  |  |  |  |  |  |  |  |  |  |  |  |  |  |  |  |  |  |  |  |  |  |  |  |  |  |  |  |  |  |  |  |  |  |  |  |  |  |  |  |  |  |  |  |  |  |  |  |  |  |  |  |  |  |  |  |  |  |  |  |  |  |  |  |  |  |  |  |  |  |  |  |  |  |  |  |  |  |  |  |  |  |  |  |  |  |  |  |  |  |  |  |  |  |  |  |  |  |  |  |  |  |  |  |  |  |  |  |  |  |  |  |  |  |  |  |  |  |  |  |  |  |  |  |  |  |  |  |  |  |  |  |  |  |  |  |  |  |  |  |  |  |  |  |  |  |  |  |  |  |  |  |  |  |  |  |  |  |  |  |  |  |  |  |  |  |  |  |  |  |  |  |  |  |  |  |  |  |  |  |  |  |  |  |  |  |  |  |  |  |  |  |  |  |  |  |  |  |  |  |  |  |  |  |  |  |  |  |  |  |  |  |  |  |  |  |  |  |  |  |  |  |  |  |  |  |  |  |  |  |  |  |  |  |  |  |  |  |  |  |  |  |  |  |  |  |  |  |  |  |  |  |  |  |  |  |  |  |  |  |  |  |  |  |  |  |  |  |  |  |  |  |  |  |  |  |  |  |  |  |  |  |  |  |  |  |  |  |  |  |  |  |  |  |  |  |  |  |  |  |  |  |  |  |  |  |  |  |  |  |  |  |  |  |  |  |  |  |  |  |  |  |  |  |  |  |  |  |  |  |  |  |  |  |  |  |  |  |  |  |  |  |  |  |  |  |  |  |  |  |  |  |  |  |  |  |  |  |  |  |  |  |  |  |  |  |  |  |  |  |  |  |  |  |  |  |  |  |  |  |  |  |  |  |  |  |  |  |  |  |  |  |  |  |  |  |  |  |  |  |  |  |  |  |  |  |  |  |  |  |  |  |  |  |  |  |  |  |  |  |  |  |  |  |  |  |  |  |  |  |  |  |  |  |  |  |  |  |  |  |  |  |  |  |  |  |  |  |  |  |  |  |  |  |  |  |  |  |  |  |  |  |  |  |  |  |  |  |  |  |  |  |  |  |  |  |  |  |  |  |  |  |  |  |  |  |  |  |  |  |  |  |  |  |  |  |  |  |  |  |  |  |  |  |  |  |  |  |  |  |  |  |  |  |  |  |  |  |  |  |  |  |  |  |  |  |  |  |  |  |  |  |  |  |  |  |  |  |  |  |  |  |  |  |  |  |  |  |  |  |  |  |  |  |  |  |  |  |  |  |  |  |  |  |  |  |  |  |  |  |  |  |  |  |  |  |  |  |  |  |  |  |  |  |  |  |  |  |  |  |  |  |  |  |  |  |  |  |  |  |  |  |  |  |  |  |  |  |  |  |  |  |  |  |  |  |  |  |  |  |  |  |  |  |  |  |  |  |  |  |  |  |  |  |  |  |  |  |  |  |  |  |  |  |  |  |  |  |  |  |  |  |  |  |  |  |  |  |  |  |  |  |  |  |  |  |  |  |  |  |  |  |  |  |  |  |  |  |  |  |  |  |  |  |  |  |  |  |  |  |  |  |  |  |  |  |  |  |  |  |  |  |  |  |  |  |  |  |  |  |  |  |  |  |  |  |  |  |  |  |  |  |  |  |  |  |  |  |  |  |  |  |  |  |  |  |  |  |  |  |  |  |  |  |  |  |  |  |  |  |  |  |  |  |  |  |  |  |  |  |  |  |  |  |  |  |  |  |  |  |  |  |  |  |  |  |  |  |  |  |  |  |  |  |  |  |  |  |  |  |  |  |  |  |  |  |  |  |  |  |  |  |  |  |  |  |  |  |  |  |  |  |  |  |  |  |  |  |  |  |  |  |  |  |  |  |  |  |  |  |  |  |  |  |  |  |  |  |  |  |  |  |  |  |  |  |  |  |  |  |  |  |  |  |  |  |  |  |  |  |  |  |  |  |  |  |  |  |  |  |  |  |  |  |  |  |  |  |  |  |  |  |  |  |  |  |  |  |  |  |  |  |  |  |  |  |  |  |  |  |  |  |  |  |  |  |  |  |  |  |  |  |  |  |  |  |  |  |  |  |  |  |  |  |  |  |  |  |  |  |  |  |  |  |  |  |  |  |  |  |  |  |  |  |  |  |  |  |  |  |  |  |  |  |  |  |  |  |  |  |  |  |  |  |  |  |  |  |  |  |  |  |  |  |  |  |  |  |  |  |  |  |  |  |  |  |  |  |  |  |  |  |  |  |  |  |  |  |  |  |  |  |  |  |  |  |  |  |  |  |  |  |  |  |  |  |  |  |  |  |  |  |  |  |  |  |  |  |  |  |  |  |  |  |  |  |  |  |  |  |  |  |  |  |  |  |  |  |  |  |  |  |  |  |  |  |  |  |  |  |  |  |  |  |  |  |  |  |  |  |  |  |  |  |  |  |  |  |  |  |  |  |  |  |  |  |  |  |  |  |  |  |  |  |  |  |  |  |  |  |  |  |  |  |  |  |  |  |  |  |  |  |  |  |  |  |  |  |  |  |  |  |  |  |  |  |  |  |  |  |  |  |  |  |  |  |  |  |  |  |  |  |  |  |  |  |  |  |  |  |  |  |  |  |  |  |  |  |  |  |  |  |  |  |  |  |  |  |  |  |  |  |  |  |  |  |  |  |  |  |  |  |  |  |  |  |  |  |  |  |  |  |  |  |  |  |  |  |  |  |  |  |  |  |  |  |  |  |  |  |  |  |  |  |  |  |  |  |  |  |  |  |  |  |  |  |  |  |  |  |  |  |  |  |  |  |  |  |  |  |  |  |  |  |  |  |  |  |  |  |  |  |  |  |  |  |  |  |  |  |  |  |  |  |  |  |  |  |  |  |  |  |  |  |  |  |  |  |  |  |  |  |  |  |  |  |  |  |  |  |  |  |  |  |  |  |  |  |  |  |  |  |  |  |  |  |  |  |  |  |  |  |  |  |  |  |  |  |  |  |  |  |  |  |
|--|--|--|--|--|--|--|--|--|--|--|--|--|--|--|--|--|--|--|--|--|--|--|--|--|--|--|--|--|--|--|--|--|--|--|--|--|--|--|--|--|--|--|--|--|--|--|--|--|--|--|--|--|--|--|--|--|--|--|--|--|--|--|--|--|--|--|--|--|--|--|--|--|--|--|--|--|--|--|--|--|--|--|--|--|--|--|--|--|--|--|--|--|--|--|--|--|--|--|--|--|--|--|--|--|--|--|--|--|--|--|--|--|--|--|--|--|--|--|--|--|--|--|--|--|--|--|--|--|--|--|--|--|--|--|--|--|--|--|--|--|--|--|--|--|--|--|--|--|--|--|--|--|--|--|--|--|--|--|--|--|--|--|--|--|--|--|--|--|--|--|--|--|--|--|--|--|--|--|--|--|--|--|--|--|--|--|--|--|--|--|--|--|--|--|--|--|--|--|--|--|--|--|--|--|--|--|--|--|--|--|--|--|--|--|--|--|--|--|--|--|--|--|--|--|--|--|--|--|--|--|--|--|--|--|--|--|--|--|--|--|--|--|--|--|--|--|--|--|--|--|--|--|--|--|--|--|--|--|--|--|--|--|--|--|--|--|--|--|--|--|--|--|--|--|--|--|--|--|--|--|--|--|--|--|--|--|--|--|--|--|--|--|--|--|--|--|--|--|--|--|--|--|--|--|--|--|--|--|--|--|--|--|--|--|--|--|--|--|--|--|--|--|--|--|--|--|--|--|--|--|--|--|--|--|--|--|--|--|--|--|--|--|--|--|--|--|--|--|--|--|--|--|--|--|--|--|--|--|--|--|--|--|--|--|--|--|--|--|--|--|--|--|--|--|--|--|--|--|--|--|--|--|--|--|--|--|--|--|--|--|--|--|--|--|--|--|--|--|--|--|--|--|--|--|--|--|--|--|--|--|--|--|--|--|--|--|--|--|--|--|--|--|--|--|--|--|--|--|--|--|--|--|--|--|--|--|--|--|--|--|--|--|--|--|--|--|--|--|--|--|--|--|--|--|--|--|--|--|--|--|--|--|--|--|--|--|--|--|--|--|--|--|--|--|--|--|--|--|--|--|--|--|--|--|--|--|--|--|--|--|--|--|--|--|--|--|--|--|--|--|--|--|--|--|--|--|--|--|--|--|--|--|--|--|--|--|--|--|--|--|--|--|--|--|--|--|--|--|--|--|--|--|--|--|--|--|--|--|--|--|--|--|--|--|--|--|--|--|--|--|--|--|--|--|--|--|--|--|--|--|--|--|--|--|--|--|--|--|--|--|--|--|--|--|--|--|--|--|--|--|--|--|--|--|--|--|--|--|--|--|--|--|--|--|--|--|--|--|--|--|--|--|--|--|--|--|--|--|--|--|--|--|--|--|--|--|--|--|--|--|--|--|--|--|--|--|--|--|--|--|--|--|--|--|--|--|--|--|--|--|--|--|--|--|--|--|--|--|--|--|--|--|--|--|--|--|--|--|--|--|--|--|--|--|--|--|--|--|--|--|--|--|--|--|--|--|--|--|--|--|--|--|--|--|--|--|--|--|--|--|--|--|--|--|--|--|--|--|--|--|--|--|--|--|--|--|--|--|--|--|--|--|--|--|--|--|--|--|--|--|--|--|--|--|--|--|--|--|--|--|--|--|--|--|--|--|--|--|--|--|--|--|--|--|--|--|--|--|--|--|--|--|--|--|--|--|--|--|--|--|--|--|--|--|--|--|--|--|--|--|--|--|--|--|--|--|--|--|--|--|--|--|--|--|--|--|--|--|--|--|--|--|--|--|--|--|--|--|--|--|--|--|--|--|--|--|--|--|--|--|--|--|--|--|--|--|--|--|--|--|--|--|--|--|--|--|--|--|--|--|--|--|--|--|--|--|--|--|--|--|--|--|--|--|--|--|--|--|--|--|--|--|--|--|--|--|--|--|--|--|--|--|--|--|--|--|--|--|--|--|--|--|--|--|--|--|--|--|--|--|--|--|--|--|--|--|--|--|--|--|--|--|--|--|--|--|--|--|--|--|--|--|--|--|--|--|--|--|--|--|--|--|--|--|--|--|--|--|--|--|--|--|--|--|--|--|--|--|--|--|--|--|--|--|--|--|--|--|--|--|--|--|--|--|--|--|--|--|--|--|--|--|--|--|--|--|--|--|--|--|--|--|--|--|--|--|--|--|--|--|--|--|--|--|--|--|--|--|--|--|--|--|--|--|--|--|--|--|--|--|--|--|--|--|--|--|--|--|--|--|--|--|--|--|--|--|--|--|--|--|--|--|--|--|--|--|--|--|--|--|--|--|--|--|--|--|--|--|--|--|--|--|--|--|--|--|--|--|--|--|--|--|--|--|--|--|--|--|--|--|--|--|--|--|--|--|--|--|--|--|--|--|--|--|--|--|--|--|--|--|--|--|--|--|--|--|--|--|--|--|--|--|--|--|--|--|--|--|--|--|--|--|--|--|--|--|--|--|--|--|--|--|--|--|--|--|--|--|--|--|--|--|--|--|--|--|--|--|--|--|--|--|--|--|--|--|--|--|--|--|--|--|--|--|--|--|--|--|--|--|--|--|--|--|--|--|--|--|--|--|--|--|--|--|--|--|--|--|--|--|--|--|--|--|--|--|--|--|--|--|--|--|--|--|--|--|--|--|--|--|--|--|--|--|--|--|--|--|--|--|--|--|--|--|--|--|--|--|--|--|--|--|--|--|--|--|--|--|--|--|--|--|--|--|--|--|--|--|--|--|--|--|--|--|--|--|--|--|--|--|--|--|--|--|--|--|--|--|--|--|--|--|--|--|--|--|--|--|--|--|--|--|--|--|--|--|--|--|--|--|--|--|--|--|--|--|--|--|--|--|--|--|--|--|--|--|--|--|--|--|--|--|--|--|--|--|--|--|--|--|--|--|--|--|--|--|--|--|--|--|--|--|--|--|--|--|--|--|--|--|--|--|--|--|--|--|--|--|--|--|--|--|--|--|--|--|--|--|--|--|--|--|--|--|--|--|--|--|--|--|--|--|--|--|--|--|--|--|--|--|--|--|--|--|--|--|--|--|--|--|--|--|--|--|--|
|  |  |  |  |  |  |  |  |  |  |  |  |  |  |  |  |  |  |  |  |  |  |  |  |  |  |  |  |  |  |  |  |  |  |  |  |  |  |  |  |  |  |  |  |  |  |  |  |  |  |  |  |  |  |  |  |  |  |  |  |  |  |  |  |  |  |  |  |  |  |  |  |  |  |  |  |  |  |  |  |  |  |  |  |  |  |  |  |  |  |  |  |  |  |  |  |  |  |  |  |  |  |  |  |  |  |  |  |  |  |  |  |  |  |  |  |  |  |  |  |  |  |  |  |  |  |  |  |  |  |  |  |  |  |  |  |  |  |  |  |  |  |  |  |  |  |  |  |  |  |  |  |  |  |  |  |  |  |  |  |  |  |  |  |  |  |  |  |  |  |  |  |  |  |  |  |  |  |  |  |  |  |  |  |  |  |  |  |  |  |  |  |  |  |  |  |  |  |  |  |  |  |  |  |  |  |  |  |  |  |  |  |  |  |  |  |  |  |  |  |  |  |  |  |  |  |  |  |  |  |  |  |  |  |  |  |  |  |  |  |  |  |  |  |  |  |  |  |  |  |  |  |  |  |  |  |  |  |  |  |  |  |  |  |  |  |  |  |  |  |  |  |  |  |  |  |  |  |  |  |  |  |  |  |  |  |  |  |  |  |  |  |  |  |  |  |  |  |  |  |  |  |  |  |  |  |  |  |  |  |  |  |  |  |  |  |  |  |  |  |  |  |  |  |  |  |  |  |  |  |  |  |  |  |  |  |  |  |  |  |  |  |  |  |  |  |  |  |  |  |  |  |  |  |  |  |  |  |  |  |  |  |  |  |  |  |  |  |  |  |  |  |  |  |  |  |  |  |  |  |  |  |  |  |  |  |  |  |  |  |  |  |  |  |  |  |  |  |  |  |  |  |  |  |  |  |  |  |  |  |  |  |  |  |  |  |  |  |  |  |  |  |  |  |  |  |  |  |  |  |  |  |  |  |  |  |  |  |  |  |  |  |  |  |  |  |  |  |  |  |  |  |  |  |  |  |  |  |  |  |  |  |  |  |  |  |  |  |  |  |  |  |  |  |  |  |  |  |  |  |  |  |  |  |  |  |  |  |  |  |  |  |  |  |  |  |  |  |  |  |  |  |  |  |  |  |  |  |  |  |  |  |  |  |  |  |  |  |  |  |  |  |  |  |  |  |  |  |  |  |  |  |  |  |  |  |  |  |  |  |  |  |  |  |  |  |  |  |  |  |  |  |  |  |  |  |  |  |  |  |  |  |  |  |  |  |  |  |  |  |  |  |  |  |  |  |  |  |  |  |  |  |  |  |  |  |  |  |  |  |  |  |  |  |  |  |  |  |  |  |  |  |  |  |  |  |  |  |  |  |  |  |  |  |  |  |  |  |  |  |  |  |  |  |  |  |  |  |  |  |  |  |  |  |  |  |  |  |  |  |  |  |  |  |  |  |  |  |  |  |  |  |  |  |  |  |  |  |  |  |  |  |  |  |  |  |  |  |  |  |  |  |  |  |  |  |  |  |  |  |  |  |  |  |  |  |  |  |  |  |  |  |  |  |  |  |  |  |  |  |  |  |  |  |  |  |  |  |  |  |  |  |  |  |  |  |  |  |  |  |  |  |  |  |  |  |  |  |  |  |  |  |  |  |  |  |  |  |  |  |  |  |  |  |  |  |  |  |  |  |  |  |  |  |  |  |  |  |  |  |  |  |  |  |  |  |  |  |  |  |  |  |  |  |  |  |  |  |  |  |  |  |  |  |  |  |  |  |  |  |  |  |  |  |  |  |  |  |  |  |  |  |  |  |  |  |  |  |  |  |  |  |  |  |  |  |  |  |  |  |  |  |  |  |  |  |  |  |  |  |  |  |  |  |  |  |  |  |  |  |  |  |  |  |  |  |  |  |  |  |  |  |  |  |  |  |  |  |  |  |  |  |  |  |  |  |  |  |  |  |  |  |  |  |  |  |  |  |  |  |  |  |  |  |  |  |  |  |  |  |  |  |  |  |  |  |  |  |  |  |  |  |  |  |  |  |  |  |  |  |  |  |  |  |  |  |  |  |  |  |  |  |  |  |  |  |  |  |  |  |  |  |  |  |  |  |  |  |  |  |  |  |  |  |  |  |  |  |  |  |  |  |  |  |  |  |  |  |  |  |  |  |  |  |  |  |  |  |  |  |  |  |  |  |  |  |  |  |  |  |  |  |  |  |  |  |  |  |  |  |  |  |  |  |  |  |  |  |  |  |  |  |  |  |  |  |  |  |  |  |  |  |  |  |  |  |  |  |  |  |  |  |  |  |  |  |  |  |  |  |  |  |  |  |  |  |  |  |  |  |  |  |  |  |  |  |  |  |  |  |  |  |  |  |  |  |  |  |  |  |  |  |  |  |  |  |  |  |  |  |  |  |  |  |  |  |  |  |  |  |  |  |  |  |  |  |  |  |  |  |  |  |  |  |  |  |  |  |  |  |  |  |  |  |  |  |  |  |  |  |  |  |  |  |  |  |  |  |  |  |  |  |  |  |  |  |  |  |  |  |  |  |  |  |  |  |  |  |  |  |  |  |  |  |  |  |  |  |  |  |  |  |  |  |  |  |  |  |  |  |  |  |  |  |  |  |  |  |  |  |  |  |  |  |  |  |  |  |  |  |  |  |  |  |  |  |  |  |  |  |  |  |  |  |  |  |  |  |  |  |  |  |  |  |  |  |  |  |  |  |  |  |  |  |  |  |  |  |  |  |  |  |  |  |  |  |  |  |  |  |  |  |  |  |  |  |  |  |  |  |  |  |  |  |  |  |  |  |  |  |  |  |  |  |  |  |  |  |  |  |  |  |  |  |  |  |  |  |  |  |  |  |  |  |  |  |  |  |  |  |  |  |  |  |  |  |  |  |  |  |  |  |  |  |  |  |  |  |  |  |  |  |  |  |  |  |  |  |  |  |  |  |  |  |  |  |  |  |  |  |  |  |  |  |  |  |  |  |  |  |  |  |  |  |  |  |  |  |  |  |  |  |  |  |  |  |  |  |  |  |  |  |  |  |  |  |  |  |  |  |  |  |  |  |  |  |
|--|--|--|--|--|--|--|--|--|--|--|--|--|--|--|--|--|--|--|--|--|--|--|--|--|--|--|--|--|--|--|--|--|--|--|--|--|--|--|--|--|--|--|--|--|--|--|--|--|--|--|--|--|--|--|--|--|--|--|--|--|--|--|--|--|--|--|--|--|--|--|--|--|--|--|--|--|--|--|--|--|--|--|--|--|--|--|--|--|--|--|--|--|--|--|--|--|--|--|--|--|--|--|--|--|--|--|--|--|--|--|--|--|--|--|--|--|--|--|--|--|--|--|--|--|--|--|--|--|--|--|--|--|--|--|--|--|--|--|--|--|--|--|--|--|--|--|--|--|--|--|--|--|--|--|--|--|--|--|--|--|--|--|--|--|--|--|--|--|--|--|--|--|--|--|--|--|--|--|--|--|--|--|--|--|--|--|--|--|--|--|--|--|--|--|--|--|--|--|--|--|--|--|--|--|--|--|--|--|--|--|--|--|--|--|--|--|--|--|--|--|--|--|--|--|--|--|--|--|--|--|--|--|--|--|--|--|--|--|--|--|--|--|--|--|--|--|--|--|--|--|--|--|--|--|--|--|--|--|--|--|--|--|--|--|--|--|--|--|--|--|--|--|--|--|--|--|--|--|--|--|--|--|--|--|--|--|--|--|--|--|--|--|--|--|--|--|--|--|--|--|--|--|--|--|--|--|--|--|--|--|--|--|--|--|--|--|--|--|--|--|--|--|--|--|--|--|--|--|--|--|--|--|--|--|--|--|--|--|--|--|--|--|--|--|--|--|--|--|--|--|--|--|--|--|--|--|--|--|--|--|--|--|--|--|--|--|--|--|--|--|--|--|--|--|--|--|--|--|--|--|--|--|--|--|--|--|--|--|--|--|--|--|--|--|--|--|--|--|--|--|--|--|--|--|--|--|--|--|--|--|--|--|--|--|--|--|--|--|--|--|--|--|--|--|--|--|--|--|--|--|--|--|--|--|--|--|--|--|--|--|--|--|--|--|--|--|--|--|--|--|--|--|--|--|--|--|--|--|--|--|--|--|--|--|--|--|--|--|--|--|--|--|--|--|--|--|--|--|--|--|--|--|--|--|--|--|--|--|--|--|--|--|--|--|--|--|--|--|--|--|--|--|--|--|--|--|--|--|--|--|--|--|--|--|--|--|--|--|--|--|--|--|--|--|--|--|--|--|--|--|--|--|--|--|--|--|--|--|--|--|--|--|--|--|--|--|--|--|--|--|--|--|--|--|--|--|--|--|--|--|--|--|--|--|--|--|--|--|--|--|--|--|--|--|--|--|--|--|--|--|--|--|--|--|--|--|--|--|--|--|--|--|--|--|--|--|--|--|--|--|--|--|--|--|--|--|--|--|--|--|--|--|--|--|--|--|--|--|--|--|--|--|--|--|--|--|--|--|--|--|--|--|--|--|--|--|--|--|--|--|--|--|--|--|--|--|--|--|--|--|--|--|--|--|--|--|--|--|--|--|--|--|--|--|--|--|--|--|--|--|--|--|--|--|--|--|--|--|--|--|--|--|--|--|--|--|--|--|--|--|--|--|--|--|--|--|--|--|--|--|--|--|--|--|--|--|--|--|--|--|--|--|--|--|--|--|--|--|--|--|--|--|--|--|--|--|--|--|--|--|--|--|--|--|--|--|--|--|--|--|--|--|--|--|--|--|--|--|--|--|--|--|--|--|--|--|--|--|--|--|--|--|--|--|--|--|--|--|--|--|--|--|--|--|--|--|--|--|--|--|--|--|--|--|--|--|--|--|--|--|--|--|--|--|--|--|--|--|--|--|--|--|--|--|--|--|--|--|--|--|--|--|--|--|--|--|--|--|--|--|--|--|--|--|--|--|--|--|--|--|--|--|--|--|--|--|--|--|--|--|--|--|--|--|--|--|--|--|--|--|--|--|--|--|--|--|--|--|--|--|--|--|--|--|--|--|--|--|--|--|--|--|--|--|--|--|--|--|--|--|--|--|--|--|--|--|--|--|--|--|--|--|--|--|--|--|--|--|--|--|--|--|--|--|--|--|--|--|--|--|--|--|--|--|--|--|--|--|--|--|--|--|--|--|--|--|--|--|--|--|--|--|--|--|--|--|--|--|--|--|--|--|--|--|--|--|--|--|--|--|--|--|--|--|--|--|--|--|--|--|--|--|--|--|--|--|--|--|--|--|--|--|--|--|--|--|--|--|--|--|--|--|--|--|--|--|--|--|--|--|--|--|--|--|--|--|--|--|--|--|--|--|--|--|--|--|--|--|--|--|--|--|--|--|--|--|--|--|--|--|--|--|--|--|--|--|--|--|--|--|--|--|--|--|--|--|--|--|--|--|--|--|--|--|--|--|--|--|--|--|--|--|--|--|--|--|--|--|--|--|--|--|--|--|--|--|--|--|--|--|--|--|--|--|--|--|--|--|--|--|--|--|--|--|--|--|--|--|--|--|--|--|--|--|--|--|--|--|--|--|--|--|--|--|--|--|--|--|--|--|--|--|--|--|--|--|--|--|--|--|--|--|--|--|--|--|--|--|--|--|--|--|--|--|--|--|--|--|--|--|--|--|--|--|--|--|--|--|--|--|--|--|--|--|--|--|--|--|--|--|--|--|--|--|--|--|--|--|--|--|--|--|--|--|--|--|--|--|--|--|--|--|--|--|--|--|--|--|--|--|--|--|--|--|--|--|--|--|--|--|--|--|--|--|--|--|--|--|--|--|--|--|--|--|--|--|--|--|--|--|--|--|--|--|--|--|--|--|--|--|--|--|--|--|--|--|--|--|--|--|--|--|--|--|--|--|--|--|--|--|--|--|--|--|--|--|--|--|--|--|--|--|--|--|--|--|--|--|--|--|--|--|--|--|--|--|--|--|--|--|--|--|--|--|--|--|--|--|--|--|--|--|--|--|--|--|--|--|--|--|--|--|--|--|--|--|--|--|--|--|--|--|--|--|--|--|--|--|--|--|--|--|--|--|--|--|--|--|--|--|--|--|--|--|--|--|--|--|--|--|--|--|--|--|--|--|--|--|--|--|--|--|--|--|--|--|--|--|--|--|--|--|--|--|--|

|              |  |                                                                                          |                 |                                                                     |                                                                                                   |             |     |   |          |       |   |                                                                                                                                                                  |  |  |                                                                                                                                                                                                                                                                                                                      |
|--------------|--|------------------------------------------------------------------------------------------|-----------------|---------------------------------------------------------------------|---------------------------------------------------------------------------------------------------|-------------|-----|---|----------|-------|---|------------------------------------------------------------------------------------------------------------------------------------------------------------------|--|--|----------------------------------------------------------------------------------------------------------------------------------------------------------------------------------------------------------------------------------------------------------------------------------------------------------------------|
|              |  |                                                                                          |                 |                                                                     |                                                                                                   |             |     |   |          |       |   |                                                                                                                                                                  |  |  | (PFAM);<br>PTHR30483<br>(PANTHER);<br>IPR028082<br>(SUPERFAMILY)                                                                                                                                                                                                                                                     |
|              |  | Anti oxidant system                                                                      | MMSR116_RS16640 | protein-methionine-sulfoxide<br>reductase catalytic subunit<br>MsrP | MSRP_PCCP ame: Full= -<br>methionine-sulfoxide reductase<br>catalytic subunit Flags:<br>Precursor | 1.276085261 | 316 | 5 | 2.53E-87 | 65.4% | 2 | F:oxidoreductase activity;<br>P:metabolic process                                                                                                                |  |  | no IPS match                                                                                                                                                                                                                                                                                                         |
|              |  |                                                                                          | MMSR116_RS25875 | iron-sulfur cluster assembly<br>accessory protein                   | ISAM1_ARATH ame: Full=Iron-<br>sulfur assembly -like<br>mitochondrial Flags: Precursor            | 1.574298856 | 125 | 5 | 4.02E-36 | 70.4% | 3 | P:response to magnetism;<br>C:mitochondrion;<br>F:binding                                                                                                        |  |  | G3DSA:3.40.190<br>.10 (GENE3D);<br>IPR015168<br>(PFAM);<br>G3DSA:3.40.190<br>.10 (GENE3D);<br>PTHR30024<br>(PANTHER);<br>PTHR30024:SF3<br>0 (PANTHER);<br>SF53850<br>(SUPERFAMILY)                                                                                                                                   |
|              |  |                                                                                          | MMSR116_RS13660 | iron-sulfur cluster assembly<br>accessory protein                   | ERPA_RUTMC ame: Full=Iron-<br>sulfur cluster insertion                                            | 1.544263394 | 108 | 5 | 3.13E-30 | 64.2% | 1 | F:binding                                                                                                                                                        |  |  | no IPS match                                                                                                                                                                                                                                                                                                         |
|              |  |                                                                                          | MMSR116_RS09760 | iron-sulfur cluster assembly<br>scaffold protein                    | ISCU_THEMA ame: Full=Iron-<br>sulfur cluster assembly scaffold<br>ame: Full=Sulfur acceptor       | 1.234439956 | 147 | 5 | 1.91E-8  | 47%   | 1 | F:binding                                                                                                                                                        |  |  | G3DSA:3.40.109<br>0.10 (GENE3D);<br>IPR002641<br>(PFAM);<br>PTHR14226<br>(PANTHER);<br>PTHR14226:SF2<br>9 (PANTHER);<br>IPR002641<br>(PROSITE_PROFI<br>LES); IPR016035<br>(SUPERFAMILY)                                                                                                                              |
|              |  | iron-sulfur (Fe-S)<br>cluster assembly<br>factor that<br>facilitates [2Fe-2S]<br>cluster | MMSR116_RS10375 | glutaredoxin 3                                                      | GLRX_PSEAE ame:<br>Full=Glutaredoxin                                                              | 1.122817368 | 89  | 5 | 2.81E-31 | 68%   | 5 | F:protein disulfide oxidoreductase activity;<br>F:glutathione binding; C:cytosol; P:single-<br>organism cellular process; P:single-organism<br>metabolic process |  |  | IPR010292<br>(PIRSF);<br>IPR010292<br>(PFAM);<br>IPR010292<br>(PANTHER);<br>PTHR37952:SF2<br>(PANTHER)                                                                                                                                                                                                               |
|              |  |                                                                                          | MMSR116_RS19155 | Fe-S cluster assembly protein<br>SufB                               | Y074_SYNY3 ame:<br>Full=UPF0051 slr0074                                                           | 1.173724852 | 489 | 5 | 0.00E+00 | 79.4% | 3 | C:chloroplast; C:cyanelle;<br>P:iron-sulfur cluster<br>assembly                                                                                                  |  |  | IPR000595<br>(SMART);<br>IPR012318<br>(SMART);<br>IPR000595<br>(PFAM);<br>IPR036388<br>(G3DSA:1.10.10.<br>GENE3D);<br>IPR012318<br>(PFAM);<br>IPR014710<br>(G3DSA:2.60.12<br>0.GENE3D);<br>PTHR24567<br>(PANTHER);<br>IPR012318<br>(PROSITE_PROFI<br>LES); IPR018490<br>(SUPERFAMILY);<br>IPR036390<br>(SUPERFAMILY) |
|              |  | iron detoxification<br>and storage                                                       | MMSR116_RS22705 | ferritin-like domain-containing<br>protein                          | YCIE_ECOLI ame: Full=                                                                             | 1.511943    | 169 | 2 | 6.53E-20 | 50%   | 1 | P:cellular response to DNA<br>damage stimulus                                                                                                                    |  |  | no IPS match                                                                                                                                                                                                                                                                                                         |
|              |  | iron detoxification<br>and storage                                                       | MMSR116_RS18390 | ferritin-like domain-containing<br>protein                          | ---NA---                                                                                          | 1.414686519 | 164 |   |          |       |   |                                                                                                                                                                  |  |  | no IPS match                                                                                                                                                                                                                                                                                                         |
| Host defence |  | host defence                                                                             | MMSR116_RS07060 | cupin domain-containing<br>protein                                  | ---NA---                                                                                          | 1.165978966 | 146 |   |          |       |   |                                                                                                                                                                  |  |  | G3DSA:1.20.58.<br>660 (GENE3D);<br>IPR007420<br>(PFAM)                                                                                                                                                                                                                                                               |



|  |                          |                    |                 |                                                   |                                                                                                                                                                      |              |     |   |         |       |   |                                                                                                                                        |  |  |                                                                                                                                                                                                                                                                                                                                                                                                                                     |
|--|--------------------------|--------------------|-----------------|---------------------------------------------------|----------------------------------------------------------------------------------------------------------------------------------------------------------------------|--------------|-----|---|---------|-------|---|----------------------------------------------------------------------------------------------------------------------------------------|--|--|-------------------------------------------------------------------------------------------------------------------------------------------------------------------------------------------------------------------------------------------------------------------------------------------------------------------------------------------------------------------------------------------------------------------------------------|
|  |                          | Antitoxin          | MMSR116_RS02995 | type II toxin-antitoxin system<br>Phd/YefM family | When bound to their toxin partners, they can bind DNA via the N terminus and repress the expression of operons containing genes encoding the toxin and the antitoxin | 2.029313361  | 84  |   |         |       |   |                                                                                                                                        |  |  | IPR004090 (PRINTS);<br>IPR003660 (SMART);<br>IPR004089 (SMART);<br>IPR033480 (SMART);<br>IPR033480 (PFAM);<br>IPR004089 (PFAM);<br>G3DSA:3.30.450.20 (GENE3D);<br>G3DSA:1.10.287.950 (GENE3D);<br>IPR003660 (PFAM);<br>G3DSA:1.10.8.500 (GENE3D);<br>PTHR32089 (PANTHER);<br>PTHR32089:SF92 (PANTHER);<br>IPR004089 (PROSITE_PROFILES);<br>IPR003660 (PROSITE_PROFILES);<br>IPR000727 (PROSITE_PROFILES);<br>SSF58104 (SUPERFAMILY) |
|  |                          | Antitoxin          | MMSR116_RS12905 | antitoxin                                         | VPB22_MYCTU ame:<br>Full=Antitoxin 22                                                                                                                                | 1.118844273  | 80  | 1 | 7.49E-2 | 55%   | 2 | P:positive regulation of translation; P:growth                                                                                         |  |  | G3DSA:2.160.20.100 (GENE3D);<br>IPR001646 (PFAM);<br>G3DSA:2.160.20.80 (GENE3D);<br>SSF141571 (SUPERFAMILY)                                                                                                                                                                                                                                                                                                                         |
|  |                          | virulence - stress | MMSR116_RS01175 | invasion-associated locus B family protein        | ---NA---                                                                                                                                                             | -1.346599581 | 259 |   |         |       |   |                                                                                                                                        |  |  | IPR014027 (SMART);<br>IPR014026 (PFAM);<br>G3DSA:3.40.50.720 (GENE3D);<br>IPR001732 (PFAM);<br>G3DSA:3.40.50.720 (GENE3D);<br>IPR028357 (PIRSF);<br>IPR017476 (PIRSF);<br>G3DSA:1.20.5.100 (GENE3D);<br>IPR014027 (PFAM);<br>IPR017476 (TIGRFAM);<br>PTHR43750:SF3 (PANTHER);<br>PTHR43750 (PANTHER);<br>PSS1257 (PROSITE_PROFILES);<br>IPR008927 (SUPERFAMILY);<br>IPR036220 (SUPERFAMILY);<br>IPR036291 (SUPERFAMILY)             |
|  | Cleavage of Xf cell wall |                    | MMSR116_RS27065 | amidohydrolase                                    | HIPO_CAMJE ame:<br>Full=Hippurate hydrolase ame:<br>Full=Benzoylelglycine                                                                                            | 1.200078563  | 385 | 5 | 5.6E-84 | 56.4% | 5 | C:intracellular membrane-bounded organelle;<br>P:metabolic process; C:endomembrane system;<br>C:cytoplasmic part; F:hydrolase activity |  |  | IPR012349 (G3DSA:2.30.110.GENE3D);<br>IPR002563                                                                                                                                                                                                                                                                                                                                                                                     |

|  |                             |  |                 |                                                      |                                                                                                                                                                                                    |              |     |   |          |        |    |                                                                                                                                                                                                                                                                                                                                                                    |  |  |  |  |                                                                                                                                                                                                                            |
|--|-----------------------------|--|-----------------|------------------------------------------------------|----------------------------------------------------------------------------------------------------------------------------------------------------------------------------------------------------|--------------|-----|---|----------|--------|----|--------------------------------------------------------------------------------------------------------------------------------------------------------------------------------------------------------------------------------------------------------------------------------------------------------------------------------------------------------------------|--|--|--|--|----------------------------------------------------------------------------------------------------------------------------------------------------------------------------------------------------------------------------|
|  |                             |  |                 |                                                      | amidohydrolase ame:<br>Full=Hippuricase                                                                                                                                                            |              |     |   |          |        |    |                                                                                                                                                                                                                                                                                                                                                                    |  |  |  |  | (PFAM);<br>PTHR43567<br>(PANTHER);<br>PTHR43567:SF1<br>(PANTHER);<br>SSF50475<br>(SUPERFAMILY)                                                                                                                             |
|  | Cleavage of<br>Xf cell wall |  | MMSR116_RS27230 | alpha/beta hydrolase                                 | YN93_YEAST ame:<br>Full=Uncharacterized hydrolase<br>YNR064C                                                                                                                                       | 1.056267904  | 322 | 5 | 4.98E-70 | 46.4%  | 1  | F:epoxide hydrolase<br>activity                                                                                                                                                                                                                                                                                                                                    |  |  |  |  | IPR018762<br>(PFAM);<br>G3DSA:1.10.287<br>.130 (GENE3D);<br>IPR036890<br>(G3DSA:3.30.56<br>5.GENE3D)                                                                                                                       |
|  | Cleavage of<br>Xf cell wall |  | MMSR116_RS27470 | alpha/beta hydrolase                                 | YFHM_BACSU ame: Full=AB<br>hydrolase superfamily                                                                                                                                                   | 1.506332266  | 285 | 5 | 6.99E-80 | 55.6%  | 8  | P:biological_process; F:catalytic activity;<br>C:membrane; C:integral component of<br>membrane; C:extracellular region;<br>C:cellular_component; F:molecular_function;<br>F:hydrolase activity                                                                                                                                                                     |  |  |  |  | IPR000788<br>(PRINTS);<br>IPR013344<br>(TIGRFAM);<br>IPR013678<br>(PFAM);<br>G3DSA:3.20.70.<br>20 (GENE3D);<br>IPR000788<br>(PFAM);<br>PTHR43371<br>(PANTHER);<br>IPR029072<br>(SUPERFAMILY);<br>SSF51998<br>(SUPERFAMILY) |
|  | Cleavage of<br>Xf cell wall |  | MMSR116_RS01255 | cell wall hydrolase SleB                             | SLEB_OCEIH ame: Full=Spore<br>cortex-lytic enzyme Short=SCLF<br>Flags: Precursor                                                                                                                   | -1.325453939 | 201 | 3 | 1.67E-4  | 50.33% | 6  | P:spore germination; F:catalytic activity; P:cell<br>wall organization; C:intracellular immature<br>spore; P:sporulation resulting in formation of a<br>cellular spore; F:hydrolase activity                                                                                                                                                                       |  |  |  |  | IPR013153<br>(SMART);<br>IPR013153<br>(PFAM);<br>IPR010650<br>(PFAM);<br>IPR016230<br>(PIRSF);<br>PTHR30267<br>(PANTHER);<br>IPR027417<br>(SUPERFAMILY)                                                                    |
|  | Cleavage of<br>Xf cell wall |  | MMSR116_RS03180 | glycoside hydrolase                                  | LYSM1_STRGL ame:<br>Full=Lysozyme M1 ame:<br>Full=1,4-beta-N-<br>acetylmuramidase M1 Flags:<br>Precursor                                                                                           | -1.104893825 | 294 | 5 | 2.64E-32 | 50.2%  | 12 | P:cell wall macromolecule catabolic process; P:carbohydrate<br>metabolic process; P:cytolysis; C:extracellular space;<br>F:catalytic activity; P:peptidoglycan catabolic process;<br>P:metabolic process; C:extracellular region; P:defense<br>response to bacterium; F:lysozyme activity; F:hydrolase<br>activity; F:hydrolase activity, acting on glycosyl bonds |  |  |  |  | IPR029039<br>(G3DSA:3.40.50.<br>GENE3D);<br>IPR005025<br>(PFAM);<br>PTHR30543:SF1<br>(PANTHER);<br>PTHR30543<br>(PANTHER);<br>IPR029039<br>(SUPERFAMILY)                                                                   |
|  | Cleavage of<br>Xf cell wall |  | MMSR116_RS14565 | hypothetical protein                                 | MLTB_ECOLI ame:<br>Full=Membrane-bound lytic<br>murein transglycosylase B ame:<br>Full=35 kDa soluble lytic<br>transglycosylase ame:<br>Full=Murein hydrolase B ame:<br>Full=SR35 Flags: Precursor | -1.049543614 | 264 | 1 | 3.44E-15 | 49%    | 2  | P:peptidoglycan<br>biosynthetic process;<br>F:lytic transglycosylase<br>activity                                                                                                                                                                                                                                                                                   |  |  |  |  | IPR012910<br>(PFAM);<br>IPR000531<br>(PFAM);<br>IPR037066<br>(G3DSA:2.170.1<br>30.GENE3D);<br>PTHR32552:SF4<br>1 (PANTHER);<br>PTHR32552<br>(PANTHER);<br>SSF56935<br>(SUPERFAMILY)                                        |
|  |                             |  | MMSR116_RS03845 | lytic transglycosylase domain-<br>containing protein | EXLYS_BPDPK ame:<br>Full=Peptidoglycan hydrolase<br>gp181 ame: Full=Gene product<br>181 Short=Gp181                                                                                                | -1.172796613 | 427 | 1 | 1.7E-22  | 52%    | 1  | P:entry into host                                                                                                                                                                                                                                                                                                                                                  |  |  |  |  | PR00421<br>(PRINTS);<br>IPR005746<br>(PIRSF);<br>IPR005746<br>(TIGRFAM);<br>G3DSA:3.40.30.<br>10 (GENE3D);<br>IPR013766<br>(PFAM);                                                                                         |



|                    |  |  |                 |                                      |                                                                                                                                                                                                              |              |     |   |         |        |    |                                                                                                                                                                                                                                                                                                                                                                                                                                                                |                                                                                                                                                                                                                                                                                                                                                              |                                                                                                                                                                                        |
|--------------------|--|--|-----------------|--------------------------------------|--------------------------------------------------------------------------------------------------------------------------------------------------------------------------------------------------------------|--------------|-----|---|---------|--------|----|----------------------------------------------------------------------------------------------------------------------------------------------------------------------------------------------------------------------------------------------------------------------------------------------------------------------------------------------------------------------------------------------------------------------------------------------------------------|--------------------------------------------------------------------------------------------------------------------------------------------------------------------------------------------------------------------------------------------------------------------------------------------------------------------------------------------------------------|----------------------------------------------------------------------------------------------------------------------------------------------------------------------------------------|
|                    |  |  |                 |                                      |                                                                                                                                                                                                              |              |     |   |         |        |    |                                                                                                                                                                                                                                                                                                                                                                                                                                                                |                                                                                                                                                                                                                                                                                                                                                              | IPR036188<br>(G3DSA:3.50.50.50.GENE3D);<br>IPR023753<br>(PFAM);<br>PTHR43256<br>(PANTHER);<br>PTHR43256:SF1<br>(PANTHER);<br>IPR016156<br>(SUPERFAMILY);<br>IPR036188<br>(SUPERFAMILY) |
| Unknown<br>fuction |  |  | MMSR116_RS27330 | DUF2934 domain-containing<br>protein | ATPF2_RHOFT ame: Full=ATP<br>synthase subunit b 2 ame:<br>Full=ATP synthase F(0) sector<br>subunit b 2 ame: Full=ATPase<br>subunit I 2 ame: Full=F-type<br>ATPase subunit b 2 Short=F-<br>ATPase subunit b 2 | -1.387436964 | 132 | 1 | 7.49E-2 | 75%    | 12 | P:ion transport; P:proton transport; F:hydrogen ion<br>transmembrane transporter activity; C:proton-transporting<br>ATP synthase complex, coupling factor F(o); C:membrane;<br>C:integral component of membrane; P:ATP biosynthetic<br>process; P:transport; C:plasma membrane; P:ATP synthesis<br>coupled proton transport; P:plasma membrane ATP<br>synthesis coupled proton transport; F:proton-transporting<br>ATP synthase activity, rotational mechanism |                                                                                                                                                                                                                                                                                                                                                              | IPR032807<br>(PFAM);<br>IPR003856<br>(PFAM);<br>PTHR32309<br>(PANTHER);<br>PTHR32309:SF1<br>3 (PANTHER)                                                                                |
|                    |  |  | MMSR116_RS14885 | DUF1150 domain-containing<br>protein | --NA--                                                                                                                                                                                                       | 1.126227657  | 94  |   |         |        |    |                                                                                                                                                                                                                                                                                                                                                                                                                                                                | IPR000531<br>(PFAM);<br>IPR036942<br>(G3DSA:2.40.170.0.GENE3D);<br>IPR012910<br>(PFAM);<br>IPR010105<br>(TIGRFAM);<br>IPR037066<br>(G3DSA:2.170.130.GENE3D);<br>PTHR32552<br>(PANTHER);<br>PTHR32552:SF70 (PANTHER);<br>SSF56935<br>(SUPERFAMILY)                                                                                                            |                                                                                                                                                                                        |
|                    |  |  | MMSR116_RS12650 | DUF1465 domain-containing<br>protein | --NA--                                                                                                                                                                                                       | 1.645032759  | 176 |   |         |        |    |                                                                                                                                                                                                                                                                                                                                                                                                                                                                | G3DSA:2.170.150.20 (GENE3D);<br>IPR002579<br>(TIGRFAM);<br>IPR002579<br>(PFAM);<br>PTHR43234<br>(PANTHER);<br>IPR002579<br>(PROSITE_PROFILES); IPR011057<br>(SUPERFAMILY)                                                                                                                                                                                    |                                                                                                                                                                                        |
|                    |  |  | MMSR116_RS12470 | DUF2076 domain-containing<br>protein | Y170_BUCBRecName:<br>Full=Uncharacterized protein<br>bbp_170; AltName: Full=yba2                                                                                                                             | 1.633019249  | 255 | 3 | 3.61E-8 | 60.67% |    |                                                                                                                                                                                                                                                                                                                                                                                                                                                                | IPR000674<br>(SMART);<br>G3DSA:3.30.365.10 (GENE3D);<br>IPR012368<br>(PIRSF);<br>G3DSA:3.30.365.10 (GENE3D);<br>G3DSA:3.30.365.10 (GENE3D);<br>G3DSA:3.30.365.10 (GENE3D);<br>G3DSA:3.90.1170.50 (GENE3D);<br>IPR008274<br>(PFAM);<br>PTHR11908:SF2<br>(PANTHER);<br>PTHR11908<br>(PANTHER);<br>IPR006311<br>(PROSITE_PROFILES); IPR037165<br>(SUPERFAMILY); |                                                                                                                                                                                        |

|  |  |  |                 |                                   |                                                                       |             |     |   |               |     |  |  |  |  |  |  |                                                                                                                                                                                                                                                                                                                                            |
|--|--|--|-----------------|-----------------------------------|-----------------------------------------------------------------------|-------------|-----|---|---------------|-----|--|--|--|--|--|--|--------------------------------------------------------------------------------------------------------------------------------------------------------------------------------------------------------------------------------------------------------------------------------------------------------------------------------------------|
|  |  |  |                 |                                   |                                                                       |             |     |   |               |     |  |  |  |  |  |  | IPR037165<br>(SUPERFAMILY)                                                                                                                                                                                                                                                                                                                 |
|  |  |  | MMSR116_RS07015 | DUF1203 domain-containing protein | ---NA---                                                              | 2.395699669 | 159 |   |               |     |  |  |  |  |  |  | IPR036444<br>(G3DSA:1.20.90.<br>GENE3D);<br>P551257<br>(PROSITE_PROFI<br>LES); IPR036444<br>(SUPERFAMILY)                                                                                                                                                                                                                                  |
|  |  |  | MMSR116_RS07710 | DUF2852 domain-containing protein | ---NA---                                                              | 1.602143222 | 154 |   |               |     |  |  |  |  |  |  | IPR019734<br>(SMART);<br>IPR011990<br>(G3DSA:1.25.40.<br>GENE3D);<br>PF13414<br>(PFAM);<br>IPR011990<br>(G3DSA:1.25.40.<br>GENE3D);<br>IPR011990<br>(G3DSA:1.25.40.<br>GENE3D);<br>IPR001440<br>(PFAM);<br>PTHR44858<br>(PANTHER);<br>IPR013026<br>(PROSITE_PROFI<br>LES); IPR019734<br>(PROSITE_PROFI<br>LES); IPR011990<br>(SUPERFAMILY) |
|  |  |  | MMSR116_RS28610 | DUF2735 domain-containing protein | GSTL_RHILE ame:<br>Full=Glutamine synthetase<br>translation inhibitor | 2.147338058 | 59  | 1 | 1.75E-3       | 45% |  |  |  |  |  |  | no IPS match                                                                                                                                                                                                                                                                                                                               |
|  |  |  | MMSR116_RS08695 | DUF2157 domain-containing protein | ---NA---                                                              | 1.359178063 | 445 |   |               |     |  |  |  |  |  |  | no IPS match                                                                                                                                                                                                                                                                                                                               |
|  |  |  | MMSR116_RS27575 | DUF1285 domain-containing protein | ---NA---                                                              | 1.208819124 | 194 |   |               |     |  |  |  |  |  |  | IPR000537<br>(PFAM);<br>G3DSA:1.20.120<br>.1780<br>(GENE3D);<br>IPR006372<br>(TIGRFAM);<br>G3DSA:1.10.357<br>.140 (GENE3D);<br>PTHR42723<br>(PANTHER)                                                                                                                                                                                      |
|  |  |  | MMSR116_RS09950 | DUF179 domain-containing protein  | Y6268_METS4 ame:<br>Full=UPF0301 M446_6268                            | 1.09269248  | 195 | 5 | 3.43E-<br>108 | 80% |  |  |  |  |  |  | IPR001623<br>(SMART);<br>IPR036869<br>(G3DSA:1.10.28<br>7.GENE3D);<br>IPR001623<br>(PFAM);<br>IPR007791<br>(PFAM);<br>IPR029024<br>(G3DSA:1.10.36<br>80.GENE3D);<br>IPR001623<br>(PROSITE_PROFI<br>LES); IPR029024<br>(SUPERFAMILY);<br>IPR036869<br>(SUPERFAMILY)                                                                         |
|  |  |  | MMSR116_RS20455 | DUF3597 domain-containing protein | ---NA---                                                              | 1.116917454 | 137 |   |               |     |  |  |  |  |  |  | IPR000825<br>(PFAM);<br>IPR010231<br>(TIGRFAM);<br>PTHR30508<br>(PANTHER);<br>PTHR30508:SF1<br>(PANTHER);                                                                                                                                                                                                                                  |

|                         |  |  |                 |                                            |                                                                               |              |     |   |          |        |   |                                                                                   |  |  |                 |                                                                                                                                                                                                           |
|-------------------------|--|--|-----------------|--------------------------------------------|-------------------------------------------------------------------------------|--------------|-----|---|----------|--------|---|-----------------------------------------------------------------------------------|--|--|-----------------|-----------------------------------------------------------------------------------------------------------------------------------------------------------------------------------------------------------|
|                         |  |  |                 |                                            |                                                                               |              |     |   |          |        |   |                                                                                   |  |  |                 | IPR037284<br>(SUPERFAMILY)                                                                                                                                                                                |
|                         |  |  | MMSR116_RS26380 | DUF2093 domain-containing protein          | ---NA---                                                                      | 1.921268462  | 72  |   |          |        |   |                                                                                   |  |  |                 | IPR003918<br>(PRINTS);<br>IPR001750<br>(PFAM);<br>PTHR42703<br>(PANTHER)                                                                                                                                  |
|                         |  |  | MMSR116_RS26135 | DUF937 domain-containing protein           | YIDB_ECOLIRecName:<br>Full=Uncharacterized protein<br>YidB                    | 1.103027937  | 235 | 1 | 9.4E-9   | 60%    |   |                                                                                   |  |  |                 | no IPS match                                                                                                                                                                                              |
|                         |  |  | MMSR116_RS25990 | DUF2794 domain-containing protein          | ---NA---                                                                      | 1.082722343  | 124 |   |          |        |   |                                                                                   |  |  |                 | IPR001623<br>(PRINTS);<br>IPR001623<br>(SMART);<br>IPR036869<br>(G3DSA:1.10.28<br>7.GENE3D);<br>IPR001623<br>(PFAM);<br>IPR001623<br>(PROSITE_PROFI<br>LES); IPR036869<br>(SUPERFAMILY)                   |
|                         |  |  | MMSR116_RS20055 | DUF4926 domain-containing protein          | ---NA---                                                                      | 1.47341565   | 83  |   |          |        |   |                                                                                   |  |  |                 | IPR036444<br>(G3DSA:1.20.90.<br>GENE3D);<br>IPR036444<br>(SUPERFAMILY)                                                                                                                                    |
|                         |  |  | MMSR116_RS22250 | DUF465 domain-containing protein           | ---NA---                                                                      | 1.881405117  | 60  |   |          |        |   |                                                                                   |  |  |                 | no IPS match                                                                                                                                                                                              |
|                         |  |  | MMSR116_RS25415 | DUF1508 domain-containing protein          | Y1088_NEIMB ame:<br>Full=UPF0339 NMB1088                                      | 1.091554947  | 61  | 5 | 4.34E-15 | 69%    |   |                                                                                   |  |  |                 | IPR000182<br>(PFAM);<br>G3DSA:3.40.630<br>.30 (GENE3D);<br>PTHR43441\$F1<br>(PANTHER);<br>PTHR43441<br>(PANTHER);<br>IPR000182<br>(PROSITE_PROFI<br>LES); IPR016181<br>(SUPERFAMILY)                      |
|                         |  |  | MMSR116_RS13505 | DUF882 domain-containing protein           | YCBK_ECOS7RecName:<br>Full=Uncharacterized protein<br>YcbK; Flags: Precursor  | -1.44148514  | 481 | 3 | 4.63E-28 | 58.33% | 2 | C:membrane; C:integral<br>component of membrane                                   |  |  | EC:2.7<br>.7.65 | IPR000160<br>(SMART);<br>IPR000160<br>(TIGRFAM);<br>G3DSA:3.30.70.<br>270 (GENE3D);<br>IPR000160<br>(PFAM);<br>PTHR45138<br>(PANTHER);<br>IPR000160<br>(PROSITE_PROFI<br>LES); IPR029787<br>(SUPERFAMILY) |
|                         |  |  | MMSR116_RS14240 | pentapeptide repeat-<br>containing protein | PIP82_SALTY ame:<br>Full=Secreted effector 2 ame:<br>Full=Type III effector 2 | 1.419673342  | 266 | 5 | 2.06E-19 | 50.8%  | 4 | C:membrane;<br>C:extracellular region;<br>P:pathogenesis; C:host cell<br>membrane |  |  |                 | G3DSA:3.75.10.<br>10 (GENE3D);<br>IPR033195<br>(PANTHER);<br>SF55909<br>(SUPERFAMILY)                                                                                                                     |
|                         |  |  | MMSR116_RS09630 | band 7 protein                             | ---NA---                                                                      | 2.353796332  | 325 |   |          |        |   |                                                                                   |  |  |                 | no IPS match                                                                                                                                                                                              |
| Hypothetical<br>protein |  |  | MMSR116_RS03055 | hypothetical protein                       | FLGE_BRUAB ame:<br>Full=Flagellar hook                                        | -1.352325453 | 424 | 5 | 1.1E-30  | 48%    | 1 | C:cell part                                                                       |  |  | EC:1.8<br>.4.11 | IPR002569<br>(PFAM);<br>IPR036509<br>(G3DSA:3.30.10<br>60.GENE3D);<br>IPR002569<br>(TIGRFAM);<br>PTHR42799                                                                                                |

|  |  |  |                 |                      |        |              |     |  |  |  |  |  |  |                |                                                                                                                                                                                                                                                                                                                                                                                                                                                                                                                                                    |
|--|--|--|-----------------|----------------------|--------|--------------|-----|--|--|--|--|--|--|----------------|----------------------------------------------------------------------------------------------------------------------------------------------------------------------------------------------------------------------------------------------------------------------------------------------------------------------------------------------------------------------------------------------------------------------------------------------------------------------------------------------------------------------------------------------------|
|  |  |  |                 |                      |        |              |     |  |  |  |  |  |  |                | (PANTHER);<br>PTHR42799:SF2<br>(PANTHER);<br>IPR002569<br>(HAMAP);<br>IPR036509<br>(SUPERFAMILY)                                                                                                                                                                                                                                                                                                                                                                                                                                                   |
|  |  |  | MMSR116_RS24385 | hypothetical protein | --NA-- | 1.248287421  | 118 |  |  |  |  |  |  |                | IPR003494<br>(SMART);<br>IPR020823<br>(TIGRFAM);<br>G3DSA:3.30.149<br>0.110<br>(GENE3D);<br>IPR020823<br>(PIRSF);<br>G3DSA:3.30.420<br>.40 (GENE3D);<br>IPR003494<br>(PFAM);<br>G3DSA:3.90.640<br>.10 (GENE3D);<br>G3DSA:3.30.420<br>.40 (GENE3D);<br>PF14450<br>(PFAM);<br>PTHR32432<br>(PANTHER);<br>PTHR32432:SF4<br>(PANTHER);<br>IPR020823<br>(HAMAP);<br>SSF53067<br>(SUPERFAMILY);<br>SSF53067<br>(SUPERFAMILY)                                                                                                                             |
|  |  |  | MMSR116_RS24380 | hypothetical protein | --NA-- | -1.329257911 | 376 |  |  |  |  |  |  |                | IPR001270<br>(PRINTS);<br>IPR003593<br>(SMART);<br>IPR019489<br>(SMART);<br>IPR019489<br>(PFAM);<br>IPR013461<br>(TIGRFAM);<br>G3DSA:1.10.8.6<br>0 (GENE3D);<br>IPR004176<br>(PFAM);<br>G3DSA:3.40.50.<br>300 (GENE3D);<br>IPR003959<br>(PFAM);<br>IPR036628<br>(G3DSA:1.10.17<br>80.GENE3D);<br>G3DSA:3.40.50.<br>300 (GENE3D);<br>G3DSA:1.10.8.6<br>0 (GENE3D);<br>IPR003959<br>(PFAM);<br>PTHR11638:SF1<br>11 (PANTHER);<br>PTHR11638<br>(PANTHER);<br>IPR027417<br>(SUPERFAMILY);<br>IPR036628<br>(SUPERFAMILY);<br>IPR027417<br>(SUPERFAMILY) |
|  |  |  | MMSR116_RS24360 | hypothetical protein | --NA-- | 3.055545399  | 96  |  |  |  |  |  |  | EC:3.3<br>.1.1 | IPR015878<br>(SMART);<br>IPR000043                                                                                                                                                                                                                                                                                                                                                                                                                                                                                                                 |

|  |  |  |                 |                      |                                       |              |     |   |           |       |  |  |  |                                                                                                                                                                                                                                                                                                 |
|--|--|--|-----------------|----------------------|---------------------------------------|--------------|-----|---|-----------|-------|--|--|--|-------------------------------------------------------------------------------------------------------------------------------------------------------------------------------------------------------------------------------------------------------------------------------------------------|
|  |  |  |                 |                      |                                       |              |     |   |           |       |  |  |  | (SMART);<br>G3DSA:3.40.50.1480 (GENE3D);<br>G3DSA:3.40.50.720 (GENE3D);<br>IPR015878 (PFAM);<br>IPR000043 (PFAM);<br>IPR000043 (PIRSF);<br>IPR000043 (TIGRFAM);<br>PTHR23420:SF0 (PANTHER);<br>IPR000043 (PANTHER);<br>IPR034373 (HAMAP);<br>SSF52283 (SUPERFAMILY);<br>IPR036291 (SUPERFAMILY) |
|  |  |  | MMSR116_RS24215 | hypothetical protein | Y6755_BRADU ame: Full=UPF0229 bil6755 | 0.885553514  | 433 | 5 | 4.96E-167 | 66.8% |  |  |  | IPR000454 (PRINTS);<br>IPR002379 (PFAM);<br>IPR005953 (TIGRFAM);<br>IPR038662 (G3DSA:1.20.20. GENE3D);<br>IPR000454 (PANTHER);<br>IPR000454 (HAMAP);<br>IPR035921 (SUPERFAMILY)                                                                                                                 |
|  |  |  | MMSR116_RS24205 | hypothetical protein | ---NA---                              | 0.99370564   | 147 |   |           |       |  |  |  | IPR002327 (PRINTS);<br>IPR009056 (PFAM);<br>IPR036909 (G3DSA:1.10.76 0.GENE3D);<br>PTHR11961:SF2 2 (PANTHER);<br>IPR002327 (PANTHER);<br>IPR009056 (PROSITE_PROFILES); IPR036909 (SUPERFAMILY)                                                                                                  |
|  |  |  | MMSR116_RS24150 | hypothetical protein | ---NA---                              | 1.879551619  | 84  |   |           |       |  |  |  | no IPS match                                                                                                                                                                                                                                                                                    |
|  |  |  | MMSR116_RS15245 | hypothetical protein | ---NA---                              | 1.152258942  | 66  |   |           |       |  |  |  | no IPS match                                                                                                                                                                                                                                                                                    |
|  |  |  | MMSR116_RS13960 | hypothetical protein | ---NA---                              | -1.303916069 | 117 |   |           |       |  |  |  | IPR001845 (PRINTS);<br>IPR001845 (SMART);<br>IPR036388 (G3DSA:1.10.10. GENE3D);<br>IPR013216 (PFAM);<br>G3DSA:3.40.50.150 (GENE3D);<br>IPR001845 (PFAM);<br>PTHR43464:SF1 7 (PANTHER);<br>PTHR43464 (PANTHER);                                                                                  |



|  |  |  |                 |                      |          |             |     |  |  |  |  |  |  |               |                                                                                                                                                                                                                                                           |
|--|--|--|-----------------|----------------------|----------|-------------|-----|--|--|--|--|--|--|---------------|-----------------------------------------------------------------------------------------------------------------------------------------------------------------------------------------------------------------------------------------------------------|
|  |  |  |                 |                      |          |             |     |  |  |  |  |  |  |               | IPR001845<br>(PROSITE_PROFI<br>LES); IPR036390<br>(SUPERFAMILY);<br>IPR029063<br>(SUPERFAMILY)                                                                                                                                                            |
|  |  |  | MMSR116_RS12625 | hypothetical protein | ---NA--- | 1.233121186 | 129 |  |  |  |  |  |  |               | IPR001041<br>(PFAM);<br>G3DSA:1.10.150<br>.120 (GENE3D);<br>IPR012675<br>(G3DSA:3.10.20.<br>GENE3D);<br>IPR002888<br>(PFAM);<br>PTHR44379<br>(PANTHER);<br>IPR001041<br>(PROSITE_PROFI<br>LES); IPR036010<br>(SUPERFAMILY);<br>IPR036884<br>(SUPERFAMILY) |
|  |  |  | MMSR116_RS12455 | hypothetical protein | ---NA--- | 1.246085478 | 63  |  |  |  |  |  |  |               | IPR010287<br>(PFAM);<br>IPR012347<br>(G3DSA:1.20.12<br>60.GENE3D);<br>PTHR30565<br>(PANTHER);<br>PTHR30565:SF1<br>(PANTHER);<br>IPR009078<br>(SUPERFAMILY)                                                                                                |
|  |  |  | MMSR116_RS11690 | hypothetical protein | ---NA--- | 1.4822949   | 224 |  |  |  |  |  |  |               | IPR019949<br>(TIGRFAM);<br>IPR036661<br>(G3DSA:3.20.20.<br>GENE3D);<br>IPR011251<br>(PFAM);<br>PTHR30137:SF6<br>(PANTHER);<br>PTHR30137<br>(PANTHER);<br>IPR036661<br>(SUPERFAMILY)                                                                       |
|  |  |  | MMSR116_RS05605 | hypothetical protein | ---NA--- | 1.452271212 | 148 |  |  |  |  |  |  |               | G3DSA:3.40.190<br>.10 (GENE3D);<br>G3DSA:3.40.190<br>.10 (GENE3D);<br>PF13531<br>(PFAM);<br>IPR005669<br>(TIGRFAM);<br>IPR005669<br>(PANTHER);<br>SSF53850<br>(SUPERFAMILY)                                                                               |
|  |  |  | MMSR116_RS05655 | hypothetical protein | ---NA--- | 1.058976227 | 157 |  |  |  |  |  |  | EC:1.9<br>7.1 | IPR013785<br>(G3DSA:3.20.20.<br>GENE3D);<br>IPR001155<br>(PFAM);<br>PTHR22893<br>(PANTHER);<br>PTHR22893:SF1<br>4 (PANTHER);<br>SSF51395<br>(SUPERFAMILY)                                                                                                 |
|  |  |  | MMSR116_RS31300 | hypothetical protein | ---NA--- | 1.883643499 | 91  |  |  |  |  |  |  |               | IPR037873<br>(G3DSA:3.30.14<br>50.GENE3D);<br>IPR007450<br>(PFAM);<br>IPR026592                                                                                                                                                                           |

|  |  |  |                 |                      |          |             |     |  |  |  |  |  |  |  |  |                                                                                                                                                                                                                                                                                                   |
|--|--|--|-----------------|----------------------|----------|-------------|-----|--|--|--|--|--|--|--|--|---------------------------------------------------------------------------------------------------------------------------------------------------------------------------------------------------------------------------------------------------------------------------------------------------|
|  |  |  |                 |                      |          |             |     |  |  |  |  |  |  |  |  | (PANTHER);<br>PSS1257<br>(PROSITE_PROFI<br>LES)                                                                                                                                                                                                                                                   |
|  |  |  | MMSR116_RS05660 | hypothetical protein | ---NA--- | 1.286525316 | 71  |  |  |  |  |  |  |  |  | G3DSA:1.20.125<br>0.20 (GENE3D);<br>IPR011701<br>(PFAM);<br>PTHR23508<br>(PANTHER);<br>PTHR23508:SF2<br>O (PANTHER);<br>IPR020846<br>(PROSITE_PROFI<br>LES); IPR036259<br>(SUPERFAMILY)                                                                                                           |
|  |  |  | MMSR116_RS05705 | hypothetical protein | ---NA--- | 1.562666018 | 105 |  |  |  |  |  |  |  |  | no IPS match                                                                                                                                                                                                                                                                                      |
|  |  |  | MMSR116_RS03700 | hypothetical protein | ---NA--- | 1.234141878 | 121 |  |  |  |  |  |  |  |  | IPR009394<br>(PFAM);<br>IPR011856<br>(G3DSA:3.40.13<br>50.GENE3D);<br>IPR009394<br>(PIRSF)                                                                                                                                                                                                        |
|  |  |  | MMSR116_RS27000 | hypothetical protein | ---NA--- | 2.647016966 | 69  |  |  |  |  |  |  |  |  | PR00091<br>(PRINTS);<br>IPR005971<br>(TIGRFAM);<br>IPR000392<br>(PFAM);<br>IPR000392<br>(PIRSF);<br>G3DSA:3.40.50.<br>300 (GENE3D);<br>IPR000392<br>(PANTHER);<br>IPR005971<br>(PTHR42864:PA<br>NTH);<br>IPR005971<br>(HAMAP);<br>IPR000392<br>(PROSITE_PROFI<br>LES); IPR027417<br>(SUPERFAMILY) |
|  |  |  | MMSR116_RS27595 | hypothetical protein | ---NA--- | 1.186874323 | 209 |  |  |  |  |  |  |  |  | PR00420<br>(PRINTS);<br>IPR011777<br>(TIGRFAM);<br>IPR023753<br>(PFAM);<br>IPR010253<br>(TIGRFAM);<br>IPR002938<br>(PFAM);<br>IPR036188<br>(G3DSA:3.50.50.<br>GENE3D);<br>PTHR42685<br>(PANTHER);<br>IPR036188<br>(SUPERFAMILY)                                                                   |
|  |  |  | MMSR116_RS28235 | hypothetical protein | ---NA--- | 1.439558942 | 87  |  |  |  |  |  |  |  |  | no IPS match                                                                                                                                                                                                                                                                                      |
|  |  |  | MMSR116_RS28525 | hypothetical protein | ---NA--- | 1.162851911 | 112 |  |  |  |  |  |  |  |  | G3DSA:3.30.9.1<br>O (GENE3D);<br>IPR036188<br>(G3DSA:3.50.50.<br>GENE3D);<br>IPR006076<br>(PFAM);<br>PTHR13847<br>(PANTHER);                                                                                                                                                                      |

|  |  |  |                 |                      |                                                                                |              |     |   |          |     |  |  |  |  |                                                                                                                                                                                                                                                                                                     |
|--|--|--|-----------------|----------------------|--------------------------------------------------------------------------------|--------------|-----|---|----------|-----|--|--|--|--|-----------------------------------------------------------------------------------------------------------------------------------------------------------------------------------------------------------------------------------------------------------------------------------------------------|
|  |  |  |                 |                      |                                                                                |              |     |   |          |     |  |  |  |  | PTHR13847:SF250 (PANTHER); IPR036188 (SUPERFAMILY); SSF54373 (SUPERFAMILY)                                                                                                                                                                                                                          |
|  |  |  | MMSR116_RS28545 | hypothetical protein | ---NA---                                                                       | 2.196266531  | 79  |   |          |     |  |  |  |  | no IPS match                                                                                                                                                                                                                                                                                        |
|  |  |  | MMSR116_RS29570 | hypothetical protein | ---NA---                                                                       | 1.633520361  | 60  |   |          |     |  |  |  |  | IPR009009 (PFAM); IPR012997 (TIGRFAM); IPR036908 (G3DSA:2.40.40.GENE3D); PTHR34183 (PANTHER); PTHR34183:SF1 (PANTHER); IPR034718 (HAMAP); IPR036908 (SUPERFAMILY)                                                                                                                                   |
|  |  |  | MMSR116_RS08700 | hypothetical protein | ---NA---                                                                       | 1.494512997  | 223 |   |          |     |  |  |  |  | no IPS match                                                                                                                                                                                                                                                                                        |
|  |  |  | MMSR116_RS08860 | hypothetical protein | CHPT_BRUA2 ame: Full=phosphotransferase ame: Full=Histidine phosphotransferase | -1.269531231 | 241 | 1 | 1.54E-29 | 62% |  |  |  |  | IPR006680 (PFAM); G3DSA:3.20.20.140 (GENE3D); IPR011059 (G3DSA:2.30.40.GENE3D); PTHR11271:SF37 (PANTHER); PTHR11271 (PANTHER); IPR032466 (SUPERFAMILY); IPR011059 (SUPERFAMILY)                                                                                                                     |
|  |  |  | MMSR116_RS08915 | hypothetical protein | ---NA---                                                                       | 2.019291405  | 87  |   |          |     |  |  |  |  | IPR011105 (PFAM); G3DSA:1.10.10.2520 (GENE3D); PSS1257 (PROSITE_PROFILES)                                                                                                                                                                                                                           |
|  |  |  | MMSR116_RS09420 | hypothetical protein | ---NA---                                                                       | 2.256621725  | 89  |   |          |     |  |  |  |  | no IPS match                                                                                                                                                                                                                                                                                        |
|  |  |  | MMSR116_RS09830 | hypothetical protein | ---NA---                                                                       | -1.19589816  | 74  |   |          |     |  |  |  |  | IPR001650 (SMART); IPR014001 (SMART); IPR011545 (PFAM); G3DSA:3.40.50.300 (GENE3D); G3DSA:3.40.50.300 (GENE3D); IPR001650 (PFAM); PTHR24031:SF349 (PANTHER); PTHR24031 (PANTHER); IPR001650 (PROSITE_PROFILES); IPR014014 (PROSITE_PROFILES); IPR014001 (PROSITE_PROFILES); IPR027417 (SUPERFAMILY) |

|  |  |  |                 |                      |          |             |     |  |  |  |  |  |  |  |  |                                                                                                                                                                                                                                                                   |
|--|--|--|-----------------|----------------------|----------|-------------|-----|--|--|--|--|--|--|--|--|-------------------------------------------------------------------------------------------------------------------------------------------------------------------------------------------------------------------------------------------------------------------|
|  |  |  | MMSR116_RS05495 | hypothetical protein | ---NA--- | 2.272628587 | 75  |  |  |  |  |  |  |  |  | IPR038162<br>(G3DSA:2.60.40.<br>GENE3D);<br>IPR013783<br>(G3DSA:2.60.40.<br>GENE3D);<br>IPR014880<br>(PFAM);<br>IPR030831<br>(TIGRFAM);<br>IPR032711<br>(PFAM);<br>IPR014756<br>(SUPERFAMILY)                                                                     |
|  |  |  | MMSR116_RS05550 | hypothetical protein | ---NA--- | 1.252647944 | 77  |  |  |  |  |  |  |  |  | G3DSA:3.40.50.<br>10610<br>(GENE3D);<br>IPR005586<br>(PFAM);<br>PTHR36698<br>(PANTHER);<br>PTHR36698.SF3<br>(PANTHER);<br>PSS1257<br>(PROSITE_PROFI<br>LES); SSF159594<br>(SUPERFAMILY)                                                                           |
|  |  |  | MMSR116_RS26110 | hypothetical protein | ---NA--- | 1.250887845 | 82  |  |  |  |  |  |  |  |  | IPR026569<br>(PFAM);<br>IPR037147<br>(G3DSA:2.30.17<br>O.GENE3D);<br>IPR001383<br>(TIGRFAM);<br>IPR026569<br>(PANTHER);<br>IPR001383<br>(HAMAP);<br>IPR034704<br>(SUPERFAMILY)                                                                                    |
|  |  |  | MMSR116_RS24515 | hypothetical protein | ---NA--- | 1.926636403 | 92  |  |  |  |  |  |  |  |  | IPR001453<br>(SMART);<br>IPR001453<br>(TIGRFAM);<br>IPR012245<br>(PIRSF);<br>IPR001453<br>(PFAM);<br>IPR036425<br>(G3DSA:3.40.98<br>O.GENE3D);<br>IPR013484<br>(TIGRFAM);<br>IPR012245<br>(PANTHER);<br>PTHR43232.SF3<br>(PANTHER);<br>IPR036425<br>(SUPERFAMILY) |
|  |  |  | MMSR116_RS24580 | hypothetical protein | ---NA--- | 1.166874756 | 152 |  |  |  |  |  |  |  |  | G3DSA:1.20.125<br>0.20 (GENE3D);<br>IPR011701<br>(PFAM);<br>PTHR23501<br>(PANTHER);<br>PTHR23501.SF9<br>8 (PANTHER);<br>IPR020846<br>(PROSITE_PROFI<br>LES); IPR036259<br>(SUPERFAMILY)                                                                           |
|  |  |  | MMSR116_RS24620 | hypothetical protein | ---NA--- | 1.610033884 | 122 |  |  |  |  |  |  |  |  | IPR005511<br>(PRINTS);<br>IPR011042<br>(G3DSA:2.120.1<br>O.GENE3D);                                                                                                                                                                                               |

|  |  |  |                 |                      |          |              |     |  |  |  |  |  |  |                  |                                                                                                                                                                                                                                  |
|--|--|--|-----------------|----------------------|----------|--------------|-----|--|--|--|--|--|--|------------------|----------------------------------------------------------------------------------------------------------------------------------------------------------------------------------------------------------------------------------|
|  |  |  |                 |                      |          |              |     |  |  |  |  |  |  |                  | IPR013658<br>(PFAM);<br>PTHR10907:SF7<br>6 (PANTHER);<br>PTHR10907<br>(PANTHER);<br>SSF63829<br>(SUPERFAMILY)                                                                                                                    |
|  |  |  | MMSR116_RS00460 | hypothetical protein | ---NA--- | 1.090119398  | 183 |  |  |  |  |  |  |                  | IPR005814<br>(PFAM);<br>IPR015422<br>(G3DSA:3.90.11<br>50.GENE3D);<br>IPR015421<br>(G3DSA:3.40.64<br>0.GENE3D);<br>IPR005814<br>(PIRSF);<br>PTHR42684<br>(PANTHER);<br>PTHR42684:SF4<br>(PANTHER);<br>IPR015424<br>(SUPERFAMILY) |
|  |  |  | MMSR116_RS23765 | hypothetical protein | ---NA--- | 1.783529633  | 85  |  |  |  |  |  |  |                  | IPR021866<br>(PFAM);<br>IPR038396<br>(G3DSA:3.40.50.<br>GENE3D);<br>IPR036513<br>(SUPERFAMILY)                                                                                                                                   |
|  |  |  | MMSR116_RS23515 | hypothetical protein | ---NA--- | 1.922385956  | 69  |  |  |  |  |  |  |                  | no IPS match                                                                                                                                                                                                                     |
|  |  |  | MMSR116_RS22285 | hypothetical protein | ---NA--- | 1.463654622  | 164 |  |  |  |  |  |  |                  | PR00313<br>(PRINTS);<br>IPR011049<br>(G3DSA:2.150.1<br>0.GENE3D);<br>IPR011049<br>(G3DSA:2.150.1<br>0.GENE3D);<br>IPR001343<br>(PFAM);<br>IPR011049<br>(SUPERFAMILY)                                                             |
|  |  |  | MMSR116_RS22270 | hypothetical protein | ---NA--- | 1.0386519    | 156 |  |  |  |  |  |  |                  | IPR018044<br>(PRINTS);<br>G3DSA:3.40.710<br>.10 (GENE3D);<br>IPR001967<br>(PFAM);<br>PTHR21581<br>(PANTHER);<br>PTHR21581:SF2<br>0 (PANTHER);<br>IPR012338<br>(SUPERFAMILY)                                                      |
|  |  |  | MMSR116_RS21810 | hypothetical protein | ---NA--- | -1.755563283 | 488 |  |  |  |  |  |  |                  | IPR011547<br>(PFAM);<br>IPR001902<br>(PANTHER);<br>PTHR11814:SF1<br>84 (PANTHER)                                                                                                                                                 |
|  |  |  | MMSR116_RS01880 | hypothetical protein | ---NA--- | 1.084167517  | 107 |  |  |  |  |  |  |                  | IPR025737<br>(PFAM)                                                                                                                                                                                                              |
|  |  |  | MMSR116_RS17280 | hypothetical protein | ---NA--- | -0.986908344 | 66  |  |  |  |  |  |  | EC:1.1<br>.1.244 | G3DSA:3.40.50.<br>1970 (GENE3D);<br>IPR001670<br>(PFAM);<br>G3DSA:1.20.109<br>0.10 (GENE3D);<br>PTHR11496:SF9<br>3 (PANTHER);<br>PTHR11496                                                                                       |

|  |  |  |                 |                      |          |             |     |  |  |  |  |  |  |                                                        |                                                                                                                                                                                                                                                                 |
|--|--|--|-----------------|----------------------|----------|-------------|-----|--|--|--|--|--|--|--------------------------------------------------------|-----------------------------------------------------------------------------------------------------------------------------------------------------------------------------------------------------------------------------------------------------------------|
|  |  |  |                 |                      |          |             |     |  |  |  |  |  |  |                                                        | (PANTHER);<br>SSF56796<br>(SUPERFAMILY)                                                                                                                                                                                                                         |
|  |  |  | MMSR116_RS16960 | hypothetical protein | ---NA--- | 1.63936624  | 81  |  |  |  |  |  |  | EC:1.2<br>.1.27;<br>EC:1.2<br>.1.3;<br>EC:1.2<br>.1.18 | IPR016163<br>(G3DSA:3.40.30<br>9.GENE3D);<br>IPR010061<br>(TIGRFAM);<br>IPR016162<br>(G3DSA:3.40.60<br>5.GENE3D);<br>IPR015590<br>(PFAM);<br>PTHR43866:SF4<br>(PANTHER);<br>IPR010061<br>(PANTHER);<br>IPR016161<br>(SUPERFAMILY)                               |
|  |  |  | MMSR116_RS01210 | hypothetical protein | ---NA--- | 1.55011465  | 107 |  |  |  |  |  |  | EC:2.3<br>.1.30                                        | IPR010493<br>(SMART);<br>G3DSA:2.160.10<br>.10 (GENE3D);<br>IPR001451<br>(PFAM);<br>IPR010493<br>(PFAM);<br>IPR005881<br>(TIGRFAM);<br>G3DSA:1.10.313<br>0.10 (GENE3D);<br>PTHR42811<br>(PANTHER);<br>PTHR42811:SF4<br>(PANTHER);<br>IPR011004<br>(SUPERFAMILY) |
|  |  |  | MMSR116_RS01035 | hypothetical protein | ---NA--- | 1.268237081 | 85  |  |  |  |  |  |  |                                                        | IPR032568<br>(PFAM)                                                                                                                                                                                                                                             |
|  |  |  | MMSR116_RS30720 | hypothetical protein | ---NA--- | 1.023119833 | 177 |  |  |  |  |  |  |                                                        | PR00173<br>(PRINTS);<br>IPR001991<br>(PFAM);<br>IPR036458<br>(G3DSA:1.10.38<br>60.GENE3D);<br>PTHR42865<br>(PANTHER);<br>IPR033380<br>(PTHR42865:PA<br>NTH);<br>PS51257<br>(PROSITE_PROFI<br>LES); IPR036458<br>(SUPERFAMILY)                                   |
|  |  |  | MMSR116_RS04135 | hypothetical protein | ---NA--- | 2.258050102 | 83  |  |  |  |  |  |  |                                                        | IPR002347<br>(PRINTS);<br>SM00822<br>(SMART);<br>IPR002347<br>(PFAM);<br>G3DSA:3.40.50.<br>720 (GENE3D);<br>PTHR43391:SF2<br>7 (PANTHER);<br>PTHR43391<br>(PANTHER);<br>IPR036291<br>(SUPERFAMILY)                                                              |
|  |  |  | MMSR116_RS21675 | hypothetical protein | ---NA--- | 1.913339653 | 74  |  |  |  |  |  |  |                                                        | IPR010287<br>(PFAM);<br>IPR012347<br>(G3DSA:1.20.12<br>60.GENE3D);<br>PTHR30565:SF9                                                                                                                                                                             |

|             |  |  |                 |                      |                                                                                |             |     |   |          |     |   |                                                 |  |  |                                                                                                                                                                                        |
|-------------|--|--|-----------------|----------------------|--------------------------------------------------------------------------------|-------------|-----|---|----------|-----|---|-------------------------------------------------|--|--|----------------------------------------------------------------------------------------------------------------------------------------------------------------------------------------|
|             |  |  |                 |                      |                                                                                |             |     |   |          |     |   |                                                 |  |  | (PANTHER);<br>PTHR30565<br>(PANTHER);<br>IPR009078<br>(SUPERFAMILY)                                                                                                                    |
|             |  |  | MMSR116_RS01705 | hypothetical protein | ---NA---                                                                       | 1.846789278 | 112 |   |          |     |   |                                                 |  |  | G3DSA:1.10.10.1550 (GENE3D);<br>IPR008807<br>(PFAM)                                                                                                                                    |
|             |  |  | MMSR116_RS20310 | hypothetical protein | ---NA---                                                                       | 1.168804326 | 83  |   |          |     |   |                                                 |  |  | no IPS match                                                                                                                                                                           |
|             |  |  | MMSR116_RS16365 | hypothetical protein | ---NA---                                                                       | 1.81994079  | 191 |   |          |     |   |                                                 |  |  | IPR019626<br>(PFAM)                                                                                                                                                                    |
|             |  |  | MMSR116_RS17490 | hypothetical protein | ---NA---                                                                       | 1.495317871 | 69  |   |          |     |   |                                                 |  |  | no IPS match                                                                                                                                                                           |
|             |  |  | MMSR116_RS02920 | hypothetical protein | CREA_ECO57 ame: Full= ame:<br>Full=Catabolite regulation A<br>Flags: Precursor | 1.076792398 | 174 | 1 | 3.21E-44 | 73% | 1 | C:cytosol                                       |  |  | IPR036812<br>(G3DSA:3.20.20. GENE3D);<br>IPR023210<br>(PFAM);<br>PTHR43364:SF5<br>(PANTHER);<br>PTHR43364<br>(PANTHER);<br>IPR036812<br>(SUPERFAMILY)                                  |
| Total : 273 |  |  | MMSR116_RS25090 | hypothetical protein | Y6063_BRADURecName:<br>Full=Uncharacterized protein<br>bli6063                 | 1.02680165  | 193 | 1 | 6.4E-12  | 52% | 2 | C:membrane; C:integral<br>component of membrane |  |  | IPR035903<br>(G3DSA:2.60.30<br>0.GENE3D);<br>IPR016092<br>(TIGRFAM);<br>IPR000361<br>(PFAM);<br>PTHR10072<br>(PANTHER);<br>PTHR10072:SF4<br>1 (PANTHER);<br>IPR035903<br>(SUPERFAMILY) |

**Table S6.** Trends in genes detected in transcriptome and secretome of *Mm*.

| locustag        | Mm co PPT | Mm PPT | Mm co TPM | Mm TPM  | Proteome ratio | Transcriptome ratio |
|-----------------|-----------|--------|-----------|---------|----------------|---------------------|
| MMSR116_RS00865 | 0.77      | 0.57   | 728.51    | 963.17  | 1.34           | 0.76                |
| MMSR116_RS07030 | 15.95     | 7.50   | 1089.62   | 798.16  | <b>2.13</b>    | <b>1.37</b>         |
| MMSR116_RS09540 | 4.37      | 4.28   | 498.57    | 365.07  | <b>1.02</b>    | <b>1.37</b>         |
| MMSR116_RS09940 | 3.24      | 3.42   | 2579.86   | 2656.27 | <b>0.95</b>    | <b>0.97</b>         |
| MMSR116_RS11970 | 29.55     | 7.01   | 1366.25   | 924.46  | <b>4.22</b>    | <b>1.48</b>         |
| MMSR116_RS12040 | 36.86     | 44.59  | 2830.85   | 5132.78 | <b>0.83</b>    | <b>0.55</b>         |
| MMSR116_RS12140 | 52.76     | 40.74  | 438.22    | 287.88  | <b>1.30</b>    | <b>1.52</b>         |
| MMSR116_RS14980 | 2.14      | 0.86   | 1204.83   | 770.74  | <b>2.50</b>    | <b>1.56</b>         |
| MMSR116_RS16505 | 61.05     | 63.26  | 3970.14   | 1868.01 | 0.97           | 2.13                |
| MMSR116_RS16515 | 39.97     | 80.68  | 851.35    | 325.67  | 0.50           | 2.61                |
| MMSR116_RS20185 | 18.62     | 9.75   | 1020.18   | 511.39  | <b>1.91</b>    | <b>1.99</b>         |
| MMSR116_RS20190 | 500.33    | 4.73   | 750.15    | 364.23  | <b>105.85</b>  | <b>2.06</b>         |
| MMSR116_RS20370 | 1.72      | 1.32   | 1195.88   | 1176.25 | <b>1.30</b>    | <b>1.02</b>         |
| MMSR116_RS20480 | 0.68      | 0.40   | 986.09    | 556.53  | <b>1.70</b>    | <b>1.77</b>         |
| MMSR116_RS23965 | 177.41    | 155.80 | 4759.12   | 1408.80 | <b>1.14</b>    | <b>3.38</b>         |
| MMSR116_RS25265 | 0.91      | 8.87   | 7347.90   | 6676.29 | 0.10           | 1.10                |
| MMSR116_RS27490 | 7.80      | 8.40   | 1630.13   | 651.58  | 0.93           | 2.50                |
| MMSR116_RS29630 | 1.04      | 0.78   | 685.73    | 440.28  | <b>1.34</b>    | <b>1.56</b>         |

**Table S7.** Trends in genes detected in transcriptome and secretome of *Xf*.

| Name    | Xfp co PPT | Xfp PPT | Xfp co TPM | Xfp TPM | Proteome ratio | Transcriptome ratio |
|---------|------------|---------|------------|---------|----------------|---------------------|
| XF_0082 | 51.32      | 412.41  | 532.21     | 211.85  | 0.12           | 2.51                |
| XF_0239 | 10.53      | 85.24   | 2093.05    | 820.72  | 0.12           | 2.55                |
| XF_0343 | 9348.55    | 8742.67 | 9529.04    | 3071.42 | <b>1.07</b>    | <b>3.10</b>         |
| XF_0357 | 12.81      | 418.63  | 122.54     | 37.11   | 0.03           | 3.30                |
| XF_0363 | 1417.21    | 8918.05 | 2884.86    | 1283.20 | 0.16           | 2.25                |
| XF_0550 | 6.44       | 48.98   | 243.94     | 98.69   | 0.13           | 2.47                |



|         |          |          |          |         |             |             |
|---------|----------|----------|----------|---------|-------------|-------------|
| XF_0565 | 71.36    | 984.90   | 418.32   | 171.10  | 0.07        | 2.44        |
| XF_0615 | 61.55    | 363.02   | 4395.44  | 949.56  | 0.17        | 4.63        |
| XF_0644 | 68.80    | 1381.47  | 1074.85  | 343.43  | 0.05        | 3.13        |
| XF_0668 | 1677.88  | 1028.33  | 185.32   | 90.44   | <b>1.63</b> | <b>2.05</b> |
| XF_0820 | 1.79     | 58.67    | 207.96   | 100.37  | 0.03        | 2.07        |
| XF_0898 | 506.33   | 7945.16  | 244.59   | 80.36   | 0.06        | 3.04        |
| XF_0964 | 322.86   | 3283.51  | 968.03   | 373.94  | 0.10        | 2.59        |
| XF_0975 | 305.53   | 3196.04  | 288.67   | 93.58   | 0.10        | 3.08        |
| XF_1011 | 626.44   | 424.26   | 57.71    | 25.68   | <b>1.48</b> | <b>2.25</b> |
| XF_1026 | 3049.67  | 1983.71  | 411.67   | 185.12  | <b>1.54</b> | <b>2.22</b> |
| XF_1219 | 31781.85 | 11249.77 | 4035.89  | 1526.69 | <b>2.83</b> | <b>2.64</b> |
| XF_1547 | 28782.96 | 24207.11 | 1588.22  | 712.88  | <b>1.19</b> | <b>2.23</b> |
| XF_1649 | 35.39    | 298.43   | 13.21    | 11.48   | 0.12        | 1.15        |
| XF_1803 | 18342.24 | 18835.12 | 24109.20 | 6849.07 | 0.97        | 3.52        |
| XF_1840 | 57.67    | 654.97   | 1408.53  | 389.58  | 0.09        | 3.62        |
| XF_1851 | 46.44    | 453.28   | 582.00   | 286.41  | 0.10        | 2.03        |
| XF_1887 | 23.62    | 248.56   | 425.54   | 204.34  | 0.10        | 2.08        |
| XF_1897 | 20.51    | 388.34   | 266.98   | 100.61  | 0.05        | 2.65        |
| XF_1981 | 1140.33  | 1261.49  | 644.08   | 298.78  | 0.90        | 2.16        |
| XF_2237 | 846.58   | 832.74   | 328.55   | 116.71  | <b>1.02</b> | <b>2.82</b> |
| XF_2340 | 15.16    | 139.73   | 943.47   | 251.21  | 0.11        | 3.76        |
| XF_2349 | 1305.60  | 1257.60  | 349.46   | 238.69  | <b>1.04</b> | <b>1.46</b> |
| XF_2407 | 20.56    | 123.74   | 94.64    | 45.78   | 0.17        | 2.07        |
| XF_2586 | 12.86    | 499.25   | 262.23   | 91.39   | 0.03        | 2.87        |
| XF_2713 | 28.79    | 271.38   | 153.78   | 75.45   | 0.11        | 2.04        |
| XF_2775 | 0.38     | 3.42     | 8.57     | 5.76    | 0.11        | 1.49        |

---
